# Supplementary material for: PreBötzinger complex neurons drive respiratory modulation of blood pressure and heart rate
Source: eLife. 2020 Jun 15;9:e57288. doi: 10.7554/eLife.57288 (PMC7326498; doi:10.7554/eLife.57288)
Supplement: Figure 2—source data 1. [file elife-57288-fig2-data1.xlsx]

## Sheet: Fig 2
	HR (bpm)			Delta 20Hz stim vs Control (%)		RSA (bpm)			Delta 20Hz stim vs Control (%)
	Control	20Hz stim	Recovery			Control	20Hz stim	Recovery
	218.551	136.37	225.167	-0.376028		1.5461	0	3.7113	-1
	298.133	94.0281	305.887	-0.68461		9.99508	0.689831	10.5872	-0.930983
	304.742	237.41	289.814	-0.220949		8.12361	4.09983	10.1874	-0.495319
	219.558	182.891	222.826	-0.167005		1.45415	1.14998	1.22648	-0.209174
	374.522	202.617	365.946	-0.459		13.5885	2.1803	16.1554	-0.839548
One Way Repeated Measures Analysis of Variance						One Way Repeated Measures Analysis of Variance
Normality Test (Shapiro-Wilk) Passed (P = 0.767)						Normality Test (Shapiro-Wilk) Passed (P = 0.999)
Equal Variance Test: Passed (P = 0.226)						Equal Variance Test: Passed (P = 0.134)
Comparison		P					P
Control vs 20Hz stim		0.009					0.046
20Hz stim vs Recovery		0.006					0.022
Control vs Recovery		0.966					0.472
