# Supplementary material for: PreBötzinger complex neurons drive respiratory modulation of blood pressure and heart rate
Source: eLife. 2020 Jun 15;9:e57288. doi: 10.7554/eLife.57288 (PMC7326498; doi:10.7554/eLife.57288)
Supplement: Figure 3—source data 1. [file elife-57288-fig3-data1.xlsx]

## Sheet: Fig3C part1
Subjects	Stim frequency	Apnea duration (s)	Number of missed resp cycles			Apnea duration (s)
20160506a - 6347s	20Hz	14.567	2.7599			Friedman Repeated Measures Analysis of Variance on Ranks
20160506b - 3690s	20Hz	21.7116	1.5568
20160510a - 5200s	20Hz	9.8475	1.4845
20160510b - 4120s	20Hz	15.3978	1.605
20160511a - 2930s	20Hz	16.5334	2.4837			Dependent Variable: Apnea duration (s)
20160511b - 2880s	20Hz	16.48	1.8738
20160513a - 3740s	20Hz	13.7606	2.4624			Normality Test (Shapiro-Wilk)	Failed	(P < 0.050)
20160513b - 3480s	20Hz	12.8875	0.6948
20160623a - 4070s	20Hz	22.3206	2.4639			Group	N	Missing	Median	0.25	0.75
20160623b - 2200s	20Hz	13.6029	0.6601			20Hz	12	0	14.982	13.066	20.417
20160706a - 2800s	20Hz	21.9438	2.4567			10Hz	12	1	15.707	6.752	31.771
20160706b - 2590s	20Hz	11.3731	2.3509			50Hz	12	3	5.681	1.859	6.668
20160506a - 6347s	10Hz	5.7093	0.7253			5Hz	12	3	8.824	3.081	10.045
20160506b - 3690s	10Hz	70.3458	11.4607
20160510a - 5200s	10Hz	4.8527	0.6765
20160510b - 4120s	10Hz					Chi-square= 20.700 with 3 degrees of freedom. (P = <0.001)
20160511a - 2930s	10Hz	27.1898	4.9193
20160511b - 2880s	10Hz	27.3789	4.2487			The differences in the median values among the treatment groups are greater than would be expected by chance; there is a statistically significant difference (P = <0.001)
20160513a - 3740s	10Hz	15.7071	2.8014
20160513b - 3480s	10Hz	12.6484	0.7297			To isolate the group or groups that differ from the others use a multiple comparison procedure.
20160623a - 4070s	10Hz	34.2979	5.0721
20160623b - 2200s	10Hz	10.8015	0.4082
20160706a - 2800s	10Hz	31.771	5.1154			All Pairwise Multiple Comparison Procedures (Tukey Test):
20160706b - 2590s	10Hz	6.7516	1.0971
20160506a - 6347s	50Hz					Comparison	Diff of Ranks	q	P<0.05
20160506b - 3690s	50Hz					10Hz vs 50Hz	20	5.477	Yes
20160510a - 5200s	50Hz	2.6445	-0.3457			10Hz vs 5Hz	14	3.834	Yes
20160510b - 4120s	50Hz					10Hz vs 20Hz	2	0.548	No
20160511a - 2930s	50Hz	7.0741	0.5617			20Hz vs 50Hz	18	4.93	Yes
20160511b - 2880s	50Hz	6.2623	0.2285			20Hz vs 5Hz	12	3.286	No
20160513a - 3740s	50Hz	5.6635	0.3481			5Hz vs 50Hz	6	1.643	No
20160513b - 3480s	50Hz	5.6805	-0.2116
20160623a - 4070s	50Hz	1.0733	-0.8407
20160623b - 2200s	50Hz	7.8758	-0.0115			Note: The multiple comparisons on ranks do not include an adjustment for ties.
20160706a - 2800s	50Hz	5.7724	0.5433
20160706b - 2590s	50Hz	1.0182	-0.6521
20160506a - 6347s	5Hz	3.9004	-0.0749			Number of missed resp cycles
20160506b - 3690s	5Hz					Friedman Repeated Measures Analysis of Variance on Ranks
20160510a - 5200s	5Hz	2.0679	-0.2759
20160510b - 4120s	5Hz
20160511a - 2930s	5Hz	9.5218	1.2615
20160511b - 2880s	5Hz	12.6569	1.6587			Dependent Variable: Number resp cycles missed
20160513a - 3740s	5Hz	9.6052	1.3487
20160513b - 3480s	5Hz					Normality Test (Shapiro-Wilk)	Failed	(P < 0.050)
20160623a - 4070s	5Hz	10.4849	0.3955
20160623b - 2200s	5Hz	8.824	0.2484			Group	N	Missing	Median	0.25	0.75
20160706a - 2800s	5Hz	6.383	0.6615			20Hz	12	0	2.112	1.503	2.463
20160706b - 2590s	5Hz	2.2623	-0.2234			10Hz	12	1	2.801	0.725	5.072
						50Hz	12	3	-0.0115	-0.499	0.446
						5Hz	12	3	0.396	-0.149	1.305
						Chi-square= 21.750 with 3 degrees of freedom. (P = <0.001)
						The differences in the median values among the treatment groups are greater than would be expected by chance; there is a statistically significant difference (P = <0.001)
						To isolate the group or groups that differ from the others use a multiple comparison procedure.
						All Pairwise Multiple Comparison Procedures (Tukey Test):
						Comparison	Diff of Ranks	q	P<0.05
						10Hz vs 50Hz	21	5.751	Yes
						10Hz vs 5Hz	13	3.56	No
						10Hz vs 20Hz	2	0.548	Do Not Test
						20Hz vs 50Hz	19	5.203	Yes
						20Hz vs 5Hz	11	3.012	Do Not Test
						5Hz vs 50Hz	8	2.191	No
						Note: The multiple comparisons on ranks do not include an adjustment for ties.
						A result of "Do Not Test" occurs for a comparison when no significant difference is found between the two rank sums that enclose that comparison. For example, if you had four rank sums sorted in order, and found no significant difference between rank sums 4 vs. 2, then you would not test 4 vs. 3 and 3 vs. 2, but still test 4 vs. 1 and 3 vs. 1 (4 vs. 3 and 3 vs. 2 are enclosed by 4 vs. 2: 4 3 2 1)…

## Sheet: Fig3C part2 and S1A
Subject	Stim period	Stim frequency	resp freq	Insp amplitude	Insp duration			Resp freq							Insp amplitude							Insp duration
20160506a	Before	5Hz	14.2302	7.704	1.4016			Friedman Repeated Measures Analysis of Variance on Ranks							Friedman Repeated Measures Analysis of Variance on Ranks							One Way Repeated Measures Analysis of Variance
20160510a	Before	5Hz	21.0116	6.14	1.0308
20160511a	Before	5Hz	14.2506	9.187	0.9805			Dependent Variable: PNA Freq							Dependent Variable: PNA amplitude							Dependent Variable: Insp Duration (s)
20160511b	Before	5Hz	12.6035	11.211	0.9742
20160513a	Before	5Hz	14.6711	4.5481	1.0559			Normality Test (Shapiro-Wilk)	Passed	(P = 0.561)					Normality Test (Shapiro-Wilk)	Failed	(P < 0.050)					Normality Test (Shapiro-Wilk)	Passed	(P = 0.522)
20160623a	Before	5Hz	7.9858	2.301	1.5462			Equal Variance Test:	Failed	(P < 0.050)					Group	N	Missing	Median	0.25	0.75		Equal Variance Test:	Passed	(P = 0.102)
20160623b	Before	5Hz	8.4889	7.002	1.4393										Before	9	0	6.14	3.564	8.445
20160706a	Before	5Hz	15.6185	5.182	1.5148			Group	N	Missing	Median	0.25	0.75		During	9	0	3.209	2.008	4.852		Treatment Name	N	Missing	Mean	Std Dev	SEM
20160706b	Before	5Hz	20.5958	2.579	1.4016			Before	9	0	14.251	10.546	18.107		After	9	0	6.172	3.652	8.298		Before	9	0	1.261	0.243	0.0811
20160506a	During	5Hz	28.9215	3.209	0.6223			During	9	0	25.046	11.479	30.031									During	9	0	0.87	0.269	0.0897
								After	9	0	14.618	10.769	19.45									After	9	0	1.258	0.258	0.0859
20160510a	During	5Hz	28.5196	5.1814	0.9177										Chi-square= 14.000 with 2 degrees of freedom. P(est.)= <0.001 P(exact)= <0.001
																						Source of Variation	DF	SS	MS	F	P
20160511a	During	5Hz	14.7522	4.523	0.836			Chi-square= 6.889 with 2 degrees of freedom. P(est.)= 0.032 P(exact)= 0.031							The differences in the median values among the treatment groups are greater than would be expected by chance; there is a statistically significant difference (P = <0.001)							Between Subjects	8	1.192	0.149
20160511b	During	5Hz	31.14	2.864	0.5908																	Between Treatments	2	0.908	0.454	18.558	<0.001
20160513a	During	5Hz	34.7318	1.646	0.6788			The differences in the median values among the treatment groups are greater than would be expected by chance; there is a statistically significant difference (P = 0.031)							To isolate the group or groups that differ from the others use a multiple comparison procedure.							Residual	16	0.391	0.0245
																						Total	26	2.491
20160623a	During	5Hz	7.3442	2.047	1.2068			To isolate the group or groups that differ from the others use a multiple comparison procedure.
20160623b	During	5Hz	8.2062	5.763	1.3828										All Pairwise Multiple Comparison Procedures (Tukey Test):							The differences in the mean values among the treatment groups are greater than would be expected by chance; there is a statistically significant difference (P = <0.001). To isolate the group or groups that differ from the others use a multiple comparison procedure.
20160706a	During	5Hz	24.0899	3.366	0.7165
20160706b	During	5Hz	25.0464	1.968	0.8799			All Pairwise Multiple Comparison Procedures (Tukey Test):							Comparison	Diff of Ranks	q	P<0.05				Power of performed test with alpha = 0.050: 0.999
20160506a	After	5Hz	14.618	7.701	1.3702										After vs During	15	5	Yes
								Comparison	Diff of Ranks	q	P<0.05				After vs Before	3	1	No
20160510a	After	5Hz	21.6191	6.172	1.0559			During vs Before	11	3.667	Yes				Before vs During	12	4	Yes				All Pairwise Multiple Comparison Procedures (Holm-Sidak method):
								During vs After	4	1.333	No											Overall significance level = 0.05
20160511a	After	5Hz	14.3605	8.895	0.9742			After vs Before	7	2.333	No
20160511b	After	5Hz	13.0486	11.616	0.9805										Note: The multiple comparisons on ranks do not include an adjustment for ties.							Comparisons for factor: Stim period
20160513a	After	5Hz	16.0176	4.5677	0.9868																	Comparison	Diff of Means	t	P	P<0.050
								Note: The multiple comparisons on ranks do not include an adjustment for ties.														Before vs. During	0.39	5.295	<0.001	Yes
20160623a	After	5Hz	8.49	2.11	1.6153																	After vs. During	0.388	5.257	<0.001	Yes
20160623b	After	5Hz	8.4175	7.268	1.4268																	Before vs. After	0.00279	0.0379	0.97	No
20160706a	After	5Hz	17.7126	5.483	1.5336
20160706b	After	5Hz	21.1881	2.737	1.3765
Subject	Stim period	Stim frequency	resp freq	Insp amplitude	Insp duration
20160506a	Before	10Hz	18.1317	7.644	1.2319			resp freq							Insp amplitude							Insp duration
20160506b	Before	10Hz	10.6281	2.728	0.9353			Friedman Repeated Measures Analysis of Variance on Ranks							Friedman Repeated Measures Analysis of Variance on Ranks							One Way Repeated Measures Analysis of Variance
20160510a	Before	10Hz	20.7294	6.106	1.0107
20160511a	Before	10Hz	13.0622	12.15	0.9994
20160511b	Before	10Hz	11.5024	10.777	0.9679			Dependent Variable: PNA Freq							Dependent Variable: PNA amplitude							Dependent Variable: Insp Duration (s)
20160513a	Before	10Hz	14.5212	4.6051	1.0434
20160513b	Before	10Hz	8.2051	6.629	1.1251			Normality Test (Shapiro-Wilk)	Failed	(P < 0.050)					Normality Test (Shapiro-Wilk)	Failed	(P < 0.050)					Normality Test (Shapiro-Wilk)	Passed	(P = 0.252)
20160623a	Before	10Hz	10.6225	2.348	1.4331
20160623b	Before	10Hz	7.8223	7.564	1.6028			Group	N	Missing	Median	0.25	0.75		Group	N	Missing	Median	0.25	0.75		Equal Variance Test:	Passed	(P = 0.110)
20160706a	Before	10Hz	11.5491	5.05	1.5148			Before	11	0	11.549	10.622	18.132		Before	11	0	6.106	2.728	7.644
20160706b	Before	10Hz	18.6365	2.22	1.5462			During	11	0	8.991	4.533	16.032		During	11	0	2.681	1.882	4.622		Treatment Name	N	Missing	Mean	Std Dev	SEM
20160506a	During	10Hz	40.7306	2.389	0.6688			After	11	0	14.293	11.194	20.695		After	11	0	5.979	3.282	7.532		Before	11	0	1.219	0.257	0.0776
20160506b	During	10Hz	0	0	0																	During	11	0	0.917	0.407	0.123
20160510a	During	10Hz	22.6961	4.622	0.9604																	After	11	0	1.204	0.253	0.0762
								Chi-square= 4.909 with 2 degrees of freedom. (P = 0.086)							Chi-square= 17.636 with 2 degrees of freedom. (P = <0.001)
20160511a	During	10Hz	8.9905	8.218	1.0497																	Source of Variation	DF	SS	MS	F	P
20160511b	During	10Hz	15.1589	2.681	0.704			The differences in the median values among the treatment groups are not great enough to exclude the possibility that the difference is due to random sampling variability; there is not a statistically significant difference (P = 0.086)							The differences in the median values among the treatment groups are greater than would be expected by chance; there is a statistically significant difference (P = <0.001)							Between Subjects	10	2.289	0.229
20160513a	During	10Hz	16.0318	1.917	0.8799																	Between Treatments	2	0.638	0.319	9.508	0.001
20160513b	During	10Hz	7.0811	4.935	0.9742										To isolate the group or groups that differ from the others use a multiple comparison procedure.							Residual	20	0.671	0.0336
20160623a	During	10Hz	1.6976	1.774	1.4519																	Total	32	3.599
20160623b	During	10Hz	6.2944	3.47	1.5336
20160706a	During	10Hz	4.5333	3.085	0.8297										All Pairwise Multiple Comparison Procedures (Tukey Test):							The differences in the mean values among the treatment groups are greater than would be expected by chance; there is a statistically significant difference (P = 0.001). To isolate the group or groups that differ from the others use a multiple comparison procedure.
20160706b	During	10Hz	14.0911	1.882	1.0308
20160506a	After	10Hz	20.6955	7.532	1.242										Comparison	Diff of Ranks	q	P<0.05				Power of performed test with alpha = 0.050: 0.947
20160506b	After	10Hz	11.1937	3.282	0.8448										Before vs During	19	5.729	Yes
20160510a	After	10Hz	21.6658	5.9795	1.0207										Before vs After	5	1.508	No
															After vs During	14	4.221	Yes				All Pairwise Multiple Comparison Procedures (Holm-Sidak method):
20160511a	After	10Hz	14.2934	11.823	0.9931																	Overall significance level = 0.05
20160511b	After	10Hz	11.9833	10.761	0.9805
20160513a	After	10Hz	15.438	4.3474	1.0434										Note: The multiple comparisons on ranks do not include an adjustment for ties.							Comparisons for factor: Stim period
20160513b	After	10Hz	8.256	6.102	1.1376																	Comparison	Diff of Means	t	P	P<0.050
20160623a	After	10Hz	11.243	2.175	1.4268																	Before vs. During	0.302	3.872	0.003	Yes
20160623b	After	10Hz	7.6417	6.465	1.5651																	After vs. During	0.287	3.673	0.003	Yes
20160706a	After	10Hz	14.7066	5.4564	1.5336																	Before vs. After	0.0155	0.199	0.844	No
20160706b	After	10Hz	20.7298	2.282	1.4519
Subject	Stim period	Stim frequency	resp freq	Insp amplitude	Insp duration
20160506a	Before	20Hz	15.4867	7.936	1.1917			resp freq							Insp amplitude							Insp duration
20160506b	Before	20Hz	7.0657	6.09	0.9742			One Way Repeated Measures Analysis of Variance							One Way Repeated Measures Analysis of Variance							One Way Repeated Measures Analysis of Variance
20160510a	Before	20Hz	15.138	5.742	1.1188
20160510b	Before	20Hz	10.1509	9.117	0.9202
20160511a	Before	20Hz	12.6424	13.45	1.0874
20160511b	Before	20Hz	10.4627	10.865	1.0434			Dependent Variable: PNA Freq							Dependent Variable: PNA amplitude							Dependent Variable: Insp Duration (s)
20160513a	Before	20Hz	15.0969	4.8258	1.0182
20160513b	Before	20Hz	7.8902	6.11	1.1502			Normality Test (Shapiro-Wilk)	Passed	(P = 0.193)					Normality Test (Shapiro-Wilk)	Passed	(P = 0.629)					Normality Test (Shapiro-Wilk)	Passed	(P = 0.842)
20160623a	Before	20Hz	9.3112	2.006	1.5148
20160623b	Before	20Hz	7.3225		1.6405			Equal Variance Test:	Passed	(P = 0.069)					Equal Variance Test:	Passed	(P = 0.820)					Equal Variance Test:	Passed	(P = 0.153)
20160706a	Before	20Hz	9.4514	5.56	1.6279
20160706b	Before	20Hz	17.6778	2.071	1.5085			Treatment Name	N	Missing	Mean	Std Dev	SEM		Treatment Name	N	Missing	Mean	Std Dev	SEM		Treatment Name	N	Missing	Mean	Std Dev	SEM
20160506a	During	20Hz	10.3367	6.707	1.1062			Before	12	0	11.475	3.613	1.043		Before	11	0	6.707	3.467	1.045		Before	11	0	1.196	0.242	0.073
20160506b	During	20Hz	7.3091	4.025	0.7354			During	12	0	11.166	3.252	0.939		During	11	0	5.594	3.363	1.014		During	11	0	1.126	0.209	0.063
20160510a	During	20Hz	15.2728	2.74	1.1942			After	12	0	12.108	3.802	1.097		After	11	0	6.529	3.09	0.932		After	11	0	1.188	0.226	0.0682
20160510b	During	20Hz	12.3361	8.888	0.9956
20160511a	During	20Hz	10.2883	11.691	1.0937			Source of Variation	DF	SS	MS	F	P		Source of Variation	DF	SS	MS	F	P		Source of Variation	DF	SS	MS	F	P
20160511b	During	20Hz	9.8528	10.067	0.9994			Between Subjects	11	378.639	34.422				Between Subjects	10	322.535	32.254				Between Subjects	10	1.454	0.145
20160513a	During	20Hz	15.7909	4.0283	1.0245			Between Treatments	2	5.539	2.77	1.515	0.242		Between Treatments	2	7.866	3.933	12.575	<0.001		Between Treatments	2	0.0319	0.016	4.03	0.034
20160513b	During	20Hz	8.9086	5.59	1.0434			Residual	22	40.207	1.828				Residual	20	6.255	0.313				Residual	20	0.0792	0.00396
20160623a	During	20Hz	11.4801	1.884	1.3639			Total	35	424.386					Total	32	336.657					Total	32	1.566
20160623b	During	20Hz	7.6896		1.4645
20160706a	During	20Hz	7.9771	4.196	1.3953			The differences in the mean values among the treatment groups are not great enough to exclude the possibility that the difference is due to random sampling variability; there is not a statistically significant difference (P = 0.242).							The differences in the mean values among the treatment groups are greater than would be expected by chance; there is a statistically significant difference (P = <0.001). To isolate the group or groups that differ from the others use a multiple comparison procedure.							The differences in the mean values among the treatment groups are greater than would be expected by chance; there is a statistically significant difference (P = 0.034). To isolate the group or groups that differ from the others use a multiple comparison procedure.
20160706b	During	20Hz	16.7508	1.714	1.4393
20160506a	After	20Hz	16.6313	8.065	1.2068			Power of performed test with alpha = 0.050: 0.120							Power of performed test with alpha = 0.050: 0.989							Power of performed test with alpha = 0.050: 0.515
20160506b	After	20Hz	8.2556	5.7335	0.9554
20160510a	After	20Hz	15.0748	5.263	1.1188			The power of the performed test (0.120) is below the desired power of 0.800.
20160510b	After	20Hz	10.2904	8.937	0.9151			Less than desired power indicates you are less likely to detect a difference when one actually exists. Negative results should be interpreted cautiously.							All Pairwise Multiple Comparison Procedures (Holm-Sidak method):							All Pairwise Multiple Comparison Procedures (Holm-Sidak method):
20160511a	After	20Hz	13.5298	11.542	1.1816										Overall significance level = 0.05							Overall significance level = 0.05
20160511b	After	20Hz	10.5633	10.668	1.0685
20160513a	After	20Hz	14.8661	5.113	0.9742										Comparisons for factor: Stim period							Comparisons for factor: Stim period
20160513b	After	20Hz	7.9892	6.836	1.1251										Comparison	Diff of Means	t	P	P<0.050			Comparison	Diff of Means	t	P	P<0.050
20160623a	After	20Hz	9.6348	2.008	1.5148										Before vs. During	1.113	4.667	<0.001	Yes			Before vs. During	0.0695	2.589	0.052	No
20160623b	After	20Hz	7.6047		1.6153										After vs. During	0.935	3.923	0.002	Yes			After vs. During	0.0618	2.304	0.063	No
20160706a	After	20Hz	11.3004	5.517	1.5588										Before vs. After	0.177	0.744	0.465	No			Before vs. After	0.00766	0.285	0.778	No
20160706b	After	20Hz	19.56	2.138	1.4519
Subject	Stim period	Stim frequency	resp freq	Insp amplitude	Insp duration
20160510a	Before	50Hz	14.8454	5.5082	1.1666			resp freq							Insp amplitude							Insp duration
								One Way Repeated Measures Analysis of Variance							One Way Repeated Measures Analysis of Variance							One Way Repeated Measures Analysis of Variance
20160511a	Before	50Hz	13.246	9.716	1.0245
20160511b	Before	50Hz	11.77	10.982	0.9931
20160513a	Before	50Hz	14.2822	4.5762	1.0119
20160513b	Before	50Hz	8.3273	6.094	1.1502			Dependent Variable: PNA Freq							Dependent Variable: PNA amplitude							Dependent Variable: Insp Duration (s)
20160623a	Before	50Hz	8.9029	1.875	1.4205
20160623b	Before	50Hz	7.5309	6.788	1.6028			Normality Test (Shapiro-Wilk)	Passed	(P = 0.345)					Normality Test (Shapiro-Wilk)	Passed	(P = 0.675)					Normality Test (Shapiro-Wilk)	Passed	(P = 0.994)
20160706a	Before	50Hz	16.0412	5.2767	1.4645
20160706b	Before	50Hz	20.5018	2.863	1.4079			Equal Variance Test:	Passed	(P = 0.521)					Equal Variance Test:	Passed	(P = 0.298)					Equal Variance Test:	Passed	(P = 0.278)
								Treatment Name	N	Missing	Mean	Std Dev	SEM		Treatment Name	N	Missing	Mean	Std Dev	SEM		Treatment Name	N	Missing	Mean	Std Dev	SEM
20160510a	During	50Hz	13.7109	5.1583	1.2722			Before	9	0	12.828	4.189	1.396		Before	9	0	5.964	2.935	0.978		Before	9	0	1.249	0.228	0.0759
								During	9	0	12.606	3.875	1.292		During	9	0	5.777	2.741	0.914		During	9	0	1.313	0.223	0.0744
20160511a	During	50Hz	12.3313	9.104	1.0057			After	9	0	12.987	4.198	1.399		After	9	0	5.995	2.899	0.966		After	9	0	1.264	0.23	0.0766
20160511b	During	50Hz	12.773	10.239	1.2256
20160513a	During	50Hz	15.0417	4.41	1.0748			Source of Variation	DF	SS	MS	F	P		Source of Variation	DF	SS	MS	F	P		Source of Variation	DF	SS	MS	F	P
20160513b	During	50Hz	9.0581	5.895	1.1439			Between Subjects	8	394.589	49.324				Between Subjects	8	195.503	24.438				Between Subjects	8	1.184	0.148
20160623a	During	50Hz	8.7478	1.906	1.6468			Between Treatments	2	0.659	0.33	0.759	0.484		Between Treatments	2	0.249	0.125	2.795	0.091		Between Treatments	2	0.0202	0.0101	3.15	0.07
20160623b	During	50Hz	7.7763	7.258	1.5651			Residual	16	6.946	0.434				Residual	16	0.713	0.0446				Residual	16	0.0513	0.00321
20160706a	During	50Hz	13.5886	5.33	1.4645			Total	26	402.193					Total	26	196.466					Total	26	1.256
20160706b	During	50Hz	20.4226	2.697	1.4205
								The differences in the mean values among the treatment groups are not great enough to exclude the possibility that the difference is due to random sampling variability; there is not a statistically significant difference (P = 0.484).							The differences in the mean values among the treatment groups are not great enough to exclude the possibility that the difference is due to random sampling variability; there is not a statistically significant difference (P = 0.091).							The differences in the mean values among the treatment groups are not great enough to exclude the possibility that the difference is due to random sampling variability; there is not a statistically significant difference (P = 0.070).
20160510a	After	50Hz	15.2665	5.4889	1.1464			Power of performed test with alpha = 0.050: 0.049							Power of performed test with alpha = 0.050: 0.310							Power of performed test with alpha = 0.050: 0.366
20160511a	After	50Hz	13.5582	9.596	1.0497			The power of the performed test (0.049) is below the desired power of 0.800.							The power of the performed test (0.310) is below the desired power of 0.800.							The power of the performed test (0.366) is below the desired power of 0.800.
20160511b	After	50Hz	12.1887	11.06	1.0622			Less than desired power indicates you are less likely to detect a difference when one actually exists. Negative results should be interpreted cautiously.							Less than desired power indicates you are less likely to detect a difference when one actually exists. Negative results should be interpreted cautiously.							Less than desired power indicates you are less likely to detect a difference when one actually exists. Negative results should be interpreted cautiously.
20160513a	After	50Hz	15.2683	4.6748	0.9931
20160513b	After	50Hz	8.157	6.148	1.1439
20160623a	After	50Hz	8.2212	2.137	1.5525
20160623b	After	50Hz	8.2386	6.833	1.5462
20160706a	After	50Hz	15.6473	5.2496	1.5022
20160706b	After	50Hz	20.3335	2.766	1.3828

## Sheet: Fig3D and S1C
Subject	Stim period	Stim frequency	Non-resp VNA		Non-resp VNA
20160506a	Before	20Hz	1.79		One Way Repeated Measures Analysis of Variance
20160506b	Before	20Hz	3.29
20160510b	Before	20Hz	0.87
20160511a	Before	20Hz	1.98		Dependent Variable: Non-resp intVNA
20160511b	Before	20Hz	1.401
20160513a	Before	20Hz	1.776		Normality Test (Shapiro-Wilk)	Passed	(P = 0.834)
					Equal Variance Test:	Passed	(P = 0.759)
					Treatment Name	N	Missing	Mean	Std Dev	SEM
					Before	6	0	1.851	0.808	0.33
20160506a	Peak inc during	20Hz	3.4706		Peak inc during	6	0	3	1.174	0.479
20160506b	Peak inc during	20Hz	4.875		End during	6	0	2.431	1.055	0.431
					After	6	0	1.831	0.819	0.334
20160510b	Peak inc during	20Hz	1.3759
20160511a	Peak inc during	20Hz	3.1769		Source of Variation	DF	SS	MS	F	P
20160511b	Peak inc during	20Hz	2.3501		Between Subjects	5	18.267	3.653
20160513a	Peak inc during	20Hz	2.754		Between Treatments	3	5.564	1.855	34.689	<0.001
					Residual	15	0.802	0.0535
					Total	23	24.634
					The differences in the mean values among the treatment groups are greater than would be expected by chance; there is a statistically significant difference (P = <0.001). To isolate the group or groups that differ from the others use a multiple comparison procedure.
20160506a	End during	20Hz	2.6008		Power of performed test with alpha = 0.050: 1.000
20160506b	End during	20Hz	4.1657
20160510b	End during	20Hz	1.1533		All Pairwise Multiple Comparison Procedures (Holm-Sidak method):
20160511a	End during	20Hz	2.8389		Overall significance level = 0.05
20160511b	End during	20Hz	1.6031
20160513a	End during	20Hz	2.2229		Comparisons for factor: Stim period
					Comparison	Diff of Means	t	P	P<0.050
					Peak inc during vs. After	1.17	8.761	<0.001	Yes
					Peak inc during vs. Before	1.149	8.609	<0.001	Yes
					End during vs. After	0.6	4.494	0.002	Yes
					End during vs. Before	0.58	4.342	0.002	Yes
20160506a	After	20Hz	1.7271		Peak inc during vs. End during	0.57	4.267	0.001	Yes
20160506b	After	20Hz	3.29		Before vs. After	0.0203	0.152	0.881	No
20160510b	After	20Hz	0.87
20160511a	After	20Hz	1.98
20160511b	After	20Hz	1.314
20160513a	After	20Hz	1.804
Subject	Stim period	Stim frequency	Non-resp VNA
20160506a	Before	10Hz	1.8123		Non-resp VNA 10Hz
20160506b	Before	10Hz	3.35		One Way Repeated Measures Analysis of Variance
20160511a	Before	10Hz	1.86
20160511b	Before	10Hz	1.287		Dependent Variable: Non-resp intVNA
20160513a	Before	10Hz	1.807
					Normality Test (Shapiro-Wilk)	Passed	(P = 0.977)
					Equal Variance Test:	Passed	(P = 0.793)
					Treatment Name	N	Missing	Mean	Std Dev	SEM
20160506a	Peak inc during	10Hz	2.6927		Before	5	0	2.023	0.778	0.348
20160506b	Peak inc during	10Hz	4.36		Peak inc during	5	0	2.986	0.84	0.376
					End during	5	0	2.661	0.867	0.388
					After	5	0	2.011	0.787	0.352
20160511a	Peak inc during	10Hz	3.0955
20160511b	Peak inc during	10Hz	2.1369		Source of Variation	DF	SS	MS	F	P
20160513a	Peak inc during	10Hz	2.6435		Between Subjects	4	10.542	2.636
					Between Treatments	3	3.515	1.172	76.007	<0.001
					Residual	12	0.185	0.0154
					Total	19	14.242
					The differences in the mean values among the treatment groups are greater than would be expected by chance; there is a statistically significant difference (P = <0.001). To isolate the group or groups that differ from the others use a multiple comparison procedure.
20160506a	End during	10Hz	2.6727
20160506b	End during	10Hz	4.0251		Power of performed test with alpha = 0.050: 1.000
20160511a	End during	10Hz	2.6263		All Pairwise Multiple Comparison Procedures (Holm-Sidak method):
20160511b	End during	10Hz	1.6406		Overall significance level = 0.05
20160513a	End during	10Hz	2.3414
					Comparisons for factor: Stim period
					Comparison	Diff of Means	t	P	P<0.050
					Peak inc during vs. After	0.975	12.414	<0.001	Yes
					Peak inc during vs. Before	0.962	12.258	<0.001	Yes
					End during vs. After	0.65	8.281	<0.001	Yes
20160506a	After	10Hz	1.86		End during vs. Before	0.638	8.125	<0.001	Yes
20160506b	After	10Hz	3.35		Peak inc during vs. End during	0.324	4.133	0.003	Yes
					Before vs. After	0.0123	0.156	0.878	No
20160511a	After	10Hz	1.78
20160511b	After	10Hz	1.258
20160513a	After	10Hz	1.807
Subject	Stim period	Stim frequency	Non-resp VNA		Non-resp VNA 50Hz
20160511a	Before	50Hz	2.04		One Way Repeated Measures Analysis of Variance
20160511b	Before	50Hz	1.26
20160513a	Before	50Hz	1.843
					Dependent Variable: Non-resp intVNA
					Normality Test (Shapiro-Wilk)	Passed	(P = 0.315)
					Equal Variance Test:	Passed	(P = 0.997)
					Treatment Name	N	Missing	Mean	Std Dev	SEM
					Before	3	0	1.714	0.406	0.234
20160511a	Peak inc during	50Hz	3.4181		Peak inc during	3	0	2.507	0.88	0.508
20160511b	Peak inc during	50Hz	1.6628		End during	3	0	2.22	0.901	0.52
20160513a	Peak inc during	50Hz	2.4406		After	3	0	1.737	0.471	0.272
					Source of Variation	DF	SS	MS	F	P
					Between Subjects	2	3.362	1.681
					Between Treatments	3	1.345	0.448	4.619	0.053
					Residual	6	0.582	0.097
					Total	11	5.289
					The differences in the mean values among the treatment groups are not great enough to exclude the possibility that the difference is due to random sampling variability; there is not a statistically significant difference (P = 0.053).
20160511a	End during	50Hz	3.203		Power of performed test with alpha = 0.050: 0.498
20160511b	End during	50Hz	1.4332
20160513a	End during	50Hz	2.0236		The power of the performed test (0.498) is below the desired power of 0.800.
					Less than desired power indicates you are less likely to detect a difference when one actually exists. Negative results should be interpreted cautiously.
20160511a	After	50Hz	2.08
20160511b	After	50Hz	1.2
20160513a	After	50Hz	1.932
Subject	Stim period	Stim frequency	Non-resp VNA		Non-resp VNA 5Hz
20160506a	Before	5Hz	1.71		One Way Repeated Measures Analysis of Variance
20160511a	Before	5Hz	1.9913		Dependent Variable: Non-resp intVNA
20160511b	Before	5Hz	1.223
20160513a	Before	5Hz	1.877		Normality Test (Shapiro-Wilk)	Passed	(P = 0.737)
					Equal Variance Test:	Passed	(P = 0.822)
					Treatment Name	N	Missing	Mean	Std Dev	SEM
					Before	4	0	1.7	0.339	0.169
20160506a	Peak inc during	5Hz	2.5087		Peak inc during	4	0	2.47	0.478	0.239
					End during	4	0	2.187	0.507	0.253
					After	4	0	1.715	0.356	0.178
20160511a	Peak inc during	5Hz	2.9075		Source of Variation	DF	SS	MS	F	P
20160511b	Peak inc during	5Hz	1.7963		Between Subjects	3	2.102	0.701
20160513a	Peak inc during	5Hz	2.6691		Between Treatments	3	1.704	0.568	64.955	<0.001
					Residual	9	0.0787	0.00874
					Total	15	3.885
					The differences in the mean values among the treatment groups are greater than would be expected by chance; there is a statistically significant difference (P = <0.001). To isolate the group or groups that differ from the others use a multiple comparison procedure.
20160506a	End during	5Hz	2.2009		Power of performed test with alpha = 0.050: 1.000
					All Pairwise Multiple Comparison Procedures (Holm-Sidak method):
20160511a	End during	5Hz	2.7294		Overall significance level = 0.05
20160511b	End during	5Hz	1.5083
20160513a	End during	5Hz	2.3097		Comparisons for factor: Stim period
					Comparison	Diff of Means	t	P	P<0.050
					Peak inc during vs. Before	0.77	11.647	<0.001	Yes
					Peak inc during vs. After	0.755	11.425	<0.001	Yes
					End during vs. Before	0.487	7.361	<0.001	Yes
					End during vs. After	0.472	7.139	<0.001	Yes
20160506a	After	5Hz	1.71		Peak inc during vs. End during	0.283	4.285	0.004	Yes
					After vs. Before	0.0147	0.222	0.829	No
20160511a	After	5Hz	2.05
20160511b	After	5Hz	1.223
20160513a	After	5Hz	1.877
Subject	Stim period	Stim frequency	Post-I VNA		Post-I VNA 5Hz
20160506a	Before	5Hz	4.7326		One Way Repeated Measures Analysis of Variance
20160511a	Before	5Hz	3.6317		Dependent Variable: Post-I VNA amplitude
20160511b	Before	5Hz	2.1736
20160513a	Before	5Hz	2.8251		Normality Test (Shapiro-Wilk)	Passed	(P = 0.592)
					Equal Variance Test:	Passed	(P = 0.165)
					Treatment Name	N	Missing	Mean	Std Dev	SEM
					Before	4	0	3.341	1.103	0.552
20160506a	During	5Hz	2.9		During	4	0	2.363	0.464	0.232
					After	4	0	3.29	1.019	0.509
					Source of Variation	DF	SS	MS	F	P
20160511a	During	5Hz	2.46		Between Subjects	3	6.624	2.208
20160511b	During	5Hz	1.774		Between Treatments	2	2.424	1.212	9.241	0.015
20160513a	During	5Hz	2.318		Residual	6	0.787	0.131
					Total	11	9.836
					The differences in the mean values among the treatment groups are greater than would be expected by chance; there is a statistically significant difference (P = 0.015). To isolate the group or groups that differ from the others use a multiple comparison procedure.
					Power of performed test with alpha = 0.050: 0.801
20160506a	After	5Hz	4.4987
					All Pairwise Multiple Comparison Procedures (Holm-Sidak method):
					Overall significance level = 0.05
20160511a	After	5Hz	3.6574
20160511b	After	5Hz	2.1294		Comparisons for factor: Stim period
20160513a	After	5Hz	2.8755		Comparison	Diff of Means	t	P	P<0.050
					Before vs. During	0.978	3.818	0.026	Yes
					After vs. During	0.927	3.62	0.022	Yes
					Before vs. After	0.0506	0.197	0.85	No
Subject	Stim period	Stim frequency	Post-I VNA		Post-I VNA 10Hz
20160506a	Before	10Hz	3.9355		One Way Repeated Measures Analysis of Variance
20160506b	Before	10Hz	4.4021
20160511a	Before	10Hz	3.2064		Dependent Variable: Post-I VNA amplitude
20160511b	Before	10Hz	2.3818
20160513a	Before	10Hz	2.8177		Normality Test (Shapiro-Wilk)	Passed	(P = 0.098)
					Equal Variance Test:	Passed	(P = 0.828)
					Treatment Name	N	Missing	Mean	Std Dev	SEM
					Before	5	0	3.349	0.82	0.367
20160506a	During	10Hz	2.9022		During	5	0	2	1.185	0.53
20160506b	During	10Hz	0		After	4	0	3.448	0.864	0.432
					Source of Variation	DF	SS	MS	F	P
20160511a	During	10Hz	2.64		Between Subjects	4	2.683	0.671
20160511b	During	10Hz	1.846		Between Treatments	2	6.188	3.094	2.753	0.131
20160513a	During	10Hz	2.61		Residual	7	7.866	1.124
					Total	13	16.809	1.293
					The differences in the mean values among the treatment groups are not great enough to exclude the possibility that the difference is due to random sampling variability; there is not a statistically significant difference (P = 0.131).
					Power of performed test with alpha = 0.050: 0.249
20160506a	After	10Hz	3.7083
20160506b	After	10Hz	4.4323		The power of the performed test (0.249) is below the desired power of 0.800.
					Less than desired power indicates you are less likely to detect a difference when one actually exists. Negative results should be interpreted cautiously.
20160511a	After	10Hz	3.2877		Expected Mean Squares:
20160511b	After	10Hz	2.3635		Approximate DF Residual = 7.000
					Expected MS(Subj) = var(res) + 2.750 var(Subj)
					Expected MS(Treatment) = var(res) + var(Treatment)
					Expected MS(Residual) = var(res)
Subject	Stim period	Stim frequency	Post-I VNA		Post-I VNA 20Hz
20160506a	Before	20Hz	4.2079		One Way Repeated Measures Analysis of Variance
20160506b	Before	20Hz	4.8786
20160510b	Before	20Hz	1.3025
20160511a	Before	20Hz	3.063		Dependent Variable: Post-I VNA amplitude
20160511b	Before	20Hz	2.6193
20160513a	Before	20Hz	2.7423		Normality Test (Shapiro-Wilk)	Passed	(P = 0.832)
					Equal Variance Test:	Passed	(P = 0.607)
					Treatment Name	N	Missing	Mean	Std Dev	SEM
					Before	6	0	3.136	1.263	0.516
20160506a	During	20Hz	4.1571		During	6	0	3.238	1.242	0.507
20160506b	During	20Hz	4.8914		After	6	0	3.116	1.233	0.504
20160510b	During	20Hz	1.3425		Source of Variation	DF	SS	MS	F	P
20160511a	During	20Hz	3.49		Between Subjects	5	23.202	4.64
20160511b	During	20Hz	2.614		Between Treatments	2	0.0521	0.026	2.771	0.11
20160513a	During	20Hz	2.936		Residual	10	0.094	0.0094
					Total	17	23.348
					The differences in the mean values among the treatment groups are not great enough to exclude the possibility that the difference is due to random sampling variability; there is not a statistically significant difference (P = 0.110).
					Power of performed test with alpha = 0.050: 0.279
20160506a	After	20Hz	3.9993
20160506b	After	20Hz	4.8764		The power of the performed test (0.279) is below the desired power of 0.800.
					Less than desired power indicates you are less likely to detect a difference when one actually exists. Negative results should be interpreted cautiously.
20160510b	After	20Hz	1.3089
20160511a	After	20Hz	3.1968
20160511b	After	20Hz	2.5288
20160513a	After	20Hz	2.7846
Subject	Stim period	Stim frequency	Post-I VNA		Post-I VNA 50Hz
20160511a	Before	50Hz	3.5466		One Way Repeated Measures Analysis of Variance
20160511b	Before	50Hz	2.3682
20160513a	Before	50Hz	2.8546
					Dependent Variable: Post-I VNA amplitude
					Normality Test (Shapiro-Wilk)	Passed	(P = 0.787)
					Equal Variance Test:	Passed	(P = 0.536)
					Treatment Name	N	Missing	Mean	Std Dev	SEM
					Before	3	0	2.923	0.592	0.342
20160511a	During	50Hz	3.91		During	3	0	2.922	0.918	0.53
20160511b	During	50Hz	2.096		After	3	0	2.888	0.629	0.363
20160513a	During	50Hz	2.761
					Source of Variation	DF	SS	MS	F	P
					Between Subjects	2	3.048	1.524
					Between Treatments	2	0.00241	0.00121	0.0371	0.964
					Residual	4	0.13	0.0325
					Total	8	3.18
					The differences in the mean values among the treatment groups are not great enough to exclude the possibility that the difference is due to random sampling variability; there is not a statistically significant difference (P = 0.964).
					Power of performed test with alpha = 0.050: 0.051
20160511a	After	50Hz	3.5452
20160511b	After	50Hz	2.2908		The power of the performed test (0.051) is below the desired power of 0.800.
20160513a	After	50Hz	2.8282		Less than desired power indicates you are less likely to detect a difference when one actually exists. Negative results should be interpreted cautiously.

## Sheet: Fig3E and S1D
Subject	Stim period	Stim frequency	HR		HR 5Hz
20160506a	Before	5Hz	299.015		Friedman Repeated Measures Analysis of Variance on Ranks
20160506b	Before	5Hz
20160510a	Before	5Hz	292.442
20160510b	Before	5Hz
20160511a	Before	5Hz	340.915		Dependent Variable: HR
20160511b	Before	5Hz	322.349
20160513a	Before	5Hz	388.805		Normality Test (Shapiro-Wilk)	Failed	(P < 0.050)
20160513b	Before	5Hz
20160623a	Before	5Hz	214.627		Group	N	Missing	Median	0.25	0.75
20160623b	Before	5Hz	338.908		Before	9	0	322.349	291.371	339.911
20160706a	Before	5Hz	290.301		Peak inc during	9	0	178.581	162.123	205.72
20160706b	Before	5Hz	329.522		End during	9	0	202.208	139.69	229.435
20160506a	Peak inc during	5Hz	191.089		After	9	0	322.249	291.421	339.833
20160506b	Peak inc during	5Hz
20160510a	Peak inc during	5Hz	174.961
20160510b	Peak inc during	5Hz			Chi-square= 23.267 with 3 degrees of freedom. (P = <0.001)
20160511a	Peak inc during	5Hz	169.25
20160511b	Peak inc during	5Hz	178.581		The differences in the median values among the treatment groups are greater than would be expected by chance; there is a statistically significant difference (P = <0.001)
20160513a	Peak inc during	5Hz	275.244
20160513b	Peak inc during	5Hz			To isolate the group or groups that differ from the others use a multiple comparison procedure.
20160623a	Peak inc during	5Hz	95.4069
20160623b	Peak inc during	5Hz	220.351
20160706a	Peak inc during	5Hz	154.997		All Pairwise Multiple Comparison Procedures (Tukey Test):
20160706b	Peak inc during	5Hz	186.084
20160506a	End during	5Hz	202.208		Comparison	Diff of Ranks	q	P<0.05
20160506b	End during	5Hz			After vs Peak inc during	22	5.68	Yes
20160510a	End during	5Hz	77.5275		After vs End during	15	3.873	Yes
20160510b	End during	5Hz			After vs Before	1	0.258	No
20160511a	End during	5Hz	215.748		Before vs Peak inc during	21	5.422	Yes
20160511b	End during	5Hz	207.25		Before vs End during	14	3.615	No
20160513a	End during	5Hz	286.212		End during vs Peak inc during	7	1.807	No
20160513b	End during	5Hz
20160623a	End during	5Hz	105.38
20160623b	End during	5Hz	243.123		Note: The multiple comparisons on ranks do not include an adjustment for ties.
20160706a	End during	5Hz	174
20160706b	End during	5Hz	201.858
20160506a	After	5Hz	301.838
20160506b	After	5Hz
20160510a	After	5Hz	293.879
20160510b	After	5Hz
20160511a	After	5Hz	339.18
20160511b	After	5Hz	322.249
20160513a	After	5Hz	382.802
20160513b	After	5Hz
20160623a	After	5Hz	216.995
20160623b	After	5Hz	340.486
20160706a	After	5Hz	288.964
20160706b	After	5Hz	330.137
Subject	Stim period	Stim frequency	HR		HR 10Hz
20160506a	Before	10Hz	327.556		One Way Repeated Measures Analysis of Variance
20160506b	Before	10Hz	367.512
20160510a	Before	10Hz	293.437
20160510b	Before	10Hz
20160511a	Before	10Hz	353.177		Dependent Variable: HR
20160511b	Before	10Hz	325.347
20160513a	Before	10Hz	393.274		Normality Test (Shapiro-Wilk)	Passed	(P = 0.726)
20160513b	Before	10Hz	375.701
20160623a	Before	10Hz	252.989		Equal Variance Test:	Passed	(P = 0.264)
20160623b	Before	10Hz	315.08
20160706a	Before	10Hz	310.034		Treatment Name	N	Missing	Mean	Std Dev	SEM
20160706b	Before	10Hz	332.437		Before	11	0	331.504	39.917	12.036
20160506a	Peak inc during	10Hz	179.793		Peak inc during	11	0	137.865	40.591	12.239
20160506b	Peak inc during	10Hz	159.193		End during	11	0	176.061	67.655	20.399
20160510a	Peak inc during	10Hz	118.873		After	11	0	329.848	40.48	12.205
20160510b	Peak inc during	10Hz
20160511a	Peak inc during	10Hz	142.075		Source of Variation	DF	SS	MS	F	P
20160511b	Peak inc during	10Hz	177.452		Between Subjects	10	73584.7	7358.47
20160513a	Peak inc during	10Hz	199.906		Between Treatments	3	339977	113326	162.017	<0.001
20160513b	Peak inc during	10Hz	142.978		Residual	30	20984.1	699.47
20160623a	Peak inc during	10Hz	77.874		Total	43	434546
20160623b	Peak inc during	10Hz	71.6601
20160706a	Peak inc during	10Hz	127.77		The differences in the mean values among the treatment groups are greater than would be expected by chance; there is a statistically significant difference (P = <0.001). To isolate the group or groups that differ from the others use a multiple comparison procedure.
20160706b	Peak inc during	10Hz	118.935
20160506a	End during	10Hz	277.325		Power of performed test with alpha = 0.050: 1.000
20160506b	End during	10Hz	163.896
20160510a	End during	10Hz	123.525
20160510b	End during	10Hz			All Pairwise Multiple Comparison Procedures (Holm-Sidak method):
20160511a	End during	10Hz	187.709		Overall significance level = 0.05
20160511b	End during	10Hz	196.281
20160513a	End during	10Hz	266.048		Comparisons for factor: Stim period
20160513b	End during	10Hz	257.12		Comparison	Diff of Means	t	P	P<0.050
20160623a	End during	10Hz	94.5725		Before vs. Peak inc during	193.639	17.171	<0.001	Yes
20160623b	End during	10Hz	83.3185		After vs. Peak inc during	191.983	17.024	<0.001	Yes
20160706a	End during	10Hz	147.123		Before vs. End during	155.443	13.784	<0.001	Yes
20160706b	End during	10Hz	139.755		After vs. End during	153.786	13.637	<0.001	Yes
20160506a	After	10Hz	336.79		End during vs. Peak inc during	38.197	3.387	0.004	Yes
20160506b	After	10Hz	363.799		Before vs. After	1.656	0.147	0.884	No
20160510a	After	10Hz	287
20160510b	After	10Hz
20160511a	After	10Hz	351.676
20160511b	After	10Hz	328.135
20160513a	After	10Hz	377.013
20160513b	After	10Hz	376.749
20160623a	After	10Hz	240.589
20160623b	After	10Hz	323.698
20160706a	After	10Hz	309.195
20160706b	After	10Hz	333.677
Subject	Stim period	Stim frequency	HR		HR 20Hz
20160506a	Before	20Hz	311.952		Friedman Repeated Measures Analysis of Variance on Ranks
20160506b	Before	20Hz	374.445
20160510a	Before	20Hz	270.71
20160510b	Before	20Hz	252.435
20160511a	Before	20Hz	354.147		Dependent Variable: HR
20160511b	Before	20Hz	335.446
20160513a	Before	20Hz	392.189		Normality Test (Shapiro-Wilk)	Passed	(P = 0.580)
20160513b	Before	20Hz	372.722
20160623a	Before	20Hz	237.044		Equal Variance Test:	Failed	(P < 0.050)
20160623b	Before	20Hz	264.83
20160706a	Before	20Hz	297.045		Group	N	Missing	Median	0.25	0.75
20160706b	Before	20Hz	327.744		Before	12	0	319.848	266.3	368.078
20160506a	Peak inc during	20Hz	147.698		Peak inc during	12	0	93.31	77.972	123.538
20160506b	Peak inc during	20Hz	91.9827		End during	12	0	212.696	132.684	237.408
20160510a	Peak inc during	20Hz	93.3364		After	12	0	327.744	279.706	368.004
20160510b	Peak inc during	20Hz	112.226
20160511a	Peak inc during	20Hz	75.6129
20160511b	Peak inc during	20Hz	93.2831		Chi-square= 32.500 with 3 degrees of freedom. (P = <0.001)
20160513a	Peak inc during	20Hz	127.309
20160513b	Peak inc during	20Hz	134.136		The differences in the median values among the treatment groups are greater than would be expected by chance; there is a statistically significant difference (P = <0.001)
20160623a	Peak inc during	20Hz	60.9992
20160623b	Peak inc during	20Hz	64.0369		To isolate the group or groups that differ from the others use a multiple comparison procedure.
20160706a	Peak inc during	20Hz	99.3635
20160706b	Peak inc during	20Hz	85.0484
20160506a	End during	20Hz	168.204		All Pairwise Multiple Comparison Procedures (Tukey Test):
20160506b	End during	20Hz	238.31
20160510a	End during	20Hz	197.391		Comparison	Diff of Ranks	q	P<0.05
20160510b	End during	20Hz	234.702		After vs Peak inc during	31	6.932	Yes
20160511a	End during	20Hz	216.923		After vs End during	19	4.249	Yes
20160511b	End during	20Hz	217.529		After vs Before	2	0.447	No
20160513a	End during	20Hz	382.165		Before vs Peak inc during	29	6.485	Yes
20160513b	End during	20Hz	298.835		Before vs End during	17	3.801	Yes
20160623a	End during	20Hz	95.4554		End during vs Peak inc during	12	2.683	No
20160623b	End during	20Hz	92.0211
20160706a	End during	20Hz	120.844
20160706b	End during	20Hz	208.469		Note: The multiple comparisons on ranks do not include an adjustment for ties.
20160506a	After	20Hz	323.392
20160506b	After	20Hz	372.735
20160510a	After	20Hz	271.433
20160510b	After	20Hz	248.458
20160511a	After	20Hz	353.811
20160511b	After	20Hz	335.293
20160513a	After	20Hz	391.178
20160513b	After	20Hz	373.178
20160623a	After	20Hz	251.353
20160623b	After	20Hz	304.525
20160706a	After	20Hz	307.429
20160706b	After	20Hz	332.097
Subject	Stim period	Stim frequency	HR		HR 50Hz
20160506a	Before	50Hz			Friedman Repeated Measures Analysis of Variance on Ranks
20160506b	Before	50Hz
20160510a	Before	50Hz	269.226
20160510b	Before	50Hz
20160511a	Before	50Hz	342.19		Dependent Variable: HR
20160511b	Before	50Hz	328.257
20160513a	Before	50Hz	389.619		Normality Test (Shapiro-Wilk)	Failed	(P < 0.050)
20160513b	Before	50Hz	376.427
20160623a	Before	50Hz	206.404		Group	N	Missing	Median	0.25	0.75
20160623b	Before	50Hz	330.601		Before	9	0	330.371	279.686	359.309
20160706a	Before	50Hz	290.147		Peak inc during	9	0	243.262	142.803	302.174
20160706b	Before	50Hz	330.371		End during	9	0	327.205	268.136	363.754
20160506a	Peak inc during	50Hz			After	9	0	313.952	281.326	357.25
20160506b	Peak inc during	50Hz
20160510a	Peak inc during	50Hz	253.2
20160510b	Peak inc during	50Hz			Chi-square= 14.191 with 3 degrees of freedom. (P = 0.003)
20160511a	Peak inc during	50Hz	187.736
20160511b	Peak inc during	50Hz	278.516		The differences in the median values among the treatment groups are greater than would be expected by chance; there is a statistically significant difference (P = 0.003)
20160513a	Peak inc during	50Hz	325.832
20160513b	Peak inc during	50Hz	376.427		To isolate the group or groups that differ from the others use a multiple comparison procedure.
20160623a	Peak inc during	50Hz	89.4697
20160623b	Peak inc during	50Hz	98.0576
20160706a	Peak inc during	50Hz	243.262		All Pairwise Multiple Comparison Procedures (Tukey Test):
20160706b	Peak inc during	50Hz	187.549
20160506a	End during	50Hz			Comparison	Diff of Ranks	q	P<0.05
20160506b	End during	50Hz			End during vs Peak inc during	19.5	5.035	Yes
20160510a	End during	50Hz	276.192		End during vs Before	5.5	1.42	No
20160510b	End during	50Hz			End during vs After	5	1.291	Do Not Test
20160511a	End during	50Hz	327.205		After vs Peak inc during	14.5	3.744	Yes
20160511b	End during	50Hz	327.481		After vs Before	0.5	0.129	Do Not Test
20160513a	End during	50Hz	391.937		Before vs Peak inc during	14	3.615	No
20160513b	End during	50Hz	382.518
20160623a	End during	50Hz	248.647
20160623b	End during	50Hz	344.99		Note: The multiple comparisons on ranks do not include an adjustment for ties.
20160706a	End during	50Hz	260.08
20160706b	End during	50Hz	288.896		A result of "Do Not Test" occurs for a comparison when no significant difference is found between the two rank sums that enclose that comparison. For example, if you had four rank sums sorted in order, and found no significant difference between rank sums 4 vs. 2, then you would not test 4 vs. 3 and 3 vs. 2, but still test 4 vs. 1 and 3 vs. 1 (4 vs. 3 and 3 vs. 2 are enclosed by 4 vs. 2: 4 3 2 1)…
20160506a	After	50Hz
20160506b	After	50Hz
20160510a	After	50Hz	271.362
20160510b	After	50Hz
20160511a	After	50Hz	313.952
20160511b	After	50Hz	303.065
20160513a	After	50Hz	390.992
20160513b	After	50Hz	376.027
20160623a	After	50Hz	215.698
20160623b	After	50Hz	338.473
20160706a	After	50Hz	291.291
20160706b	After	50Hz	333.561
Subject	Stim frequency	Time to first HR step			Time to first HR step
20160506a - 6347s	20Hz	1.5074			One Way Repeated Measures Analysis of Variance
20160506b - 3690s	20Hz	2.0087
20160510a - 5200s	20Hz	1.433
20160510b - 4120s	20Hz	3.7671
20160511a - 2930s	20Hz	3.4302			Dependent Variable: Time from beginning stim to 1s
20160511b - 2880s	20Hz	3.7382
20160513a - 3740s	20Hz	3.8848			Normality Test (Shapiro-Wilk)	Passed	(P = 0.577)
20160513b - 3480s	20Hz	2.503
20160623a - 4070s	20Hz	2.6124			Equal Variance Test:	Passed	(P = 0.863)
20160623b - 2200s	20Hz	2.5598
20160706a - 2800s	20Hz	3.8595			Treatment Name	N	Missing	Mean	Std Dev	SEM
20160706b - 2590s	20Hz	1.5933			20Hz	6	0	2.966	0.87	0.355
20160506a - 6347s	10Hz	3.7382			10Hz	6	0	3.401	1.189	0.486
20160506b - 3690s	10Hz	3.6752			50Hz	6	0	2.303	1.389	0.567
20160510a - 5200s	10Hz	3.8198			5Hz	6	0	8.884	0.691	0.282
20160510b - 4120s	10Hz
20160511a - 2930s	10Hz	5.2066			Source of Variation	DF	SS	MS	F	P
20160511b - 2880s	10Hz	3.074			Between Subjects	5	8.684	1.737
20160513a - 3740s	10Hz	6.5867			Between Treatments	3	165.371	55.124	58.225	<0.001
20160513b - 3480s	10Hz	3.3571			Residual	15	14.201	0.947
20160623a - 4070s	10Hz	1.6121			Total	23	188.256
20160623b - 2200s	10Hz	2.9729
20160706a - 2800s	10Hz	3.9303			The differences in the mean values among the treatment groups are greater than would be expected by chance; there is a statistically significant difference (P = <0.001). To isolate the group or groups that differ from the others use a multiple comparison procedure.
20160706b - 2590s	10Hz	3.6095
20160506a - 6347s	50Hz				Power of performed test with alpha = 0.050: 1.000
20160506b - 3690s	50Hz
20160510a - 5200s	50Hz
20160510b - 4120s	50Hz				All Pairwise Multiple Comparison Procedures (Holm-Sidak method):
20160511a - 2930s	50Hz	1.335			Overall significance level = 0.05
20160511b - 2880s	50Hz	1.3133
20160513a - 3740s	50Hz	5.4515			Comparisons for factor: Stim frequency
20160513b - 3480s	50Hz	0			Comparison	Diff of Means	t	P	P<0.050
20160623a - 4070s	50Hz	1.3262			5Hz vs. 50Hz	6.581	11.716	<0.001	Yes
20160623b - 2200s	50Hz	3.2599			5Hz vs. 20Hz	5.919	10.536	<0.001	Yes
20160706a - 2800s	50Hz	4.6879			5Hz vs. 10Hz	5.483	9.761	<0.001	Yes
20160706b - 2590s	50Hz	1.8947			10Hz vs. 50Hz	1.098	1.955	0.194	No
20160506a - 6347s	5Hz	5.9187			20Hz vs. 50Hz	0.663	1.18	0.447	No
20160506b - 3690s	5Hz				10Hz vs. 20Hz	0.435	0.775	0.45	No
20160510a - 5200s	5Hz
20160510b - 4120s	5Hz
20160511a - 2930s	5Hz	8.8801
20160511b - 2880s	5Hz	9.3608
20160513a - 3740s	5Hz
20160513b - 3480s	5Hz
20160623a - 4070s	5Hz	7.745
20160623b - 2200s	5Hz	9.7297
20160706a - 2800s	5Hz	8.5401
20160706b - 2590s	5Hz	9.0498
Subject	Stim frequency	Time to max bradycardia			Time to max bradycardia
20160506a - 6347s	20Hz	18.7497			One Way Repeated Measures Analysis of Variance
20160506b - 3690s	20Hz	15.9912
20160510a - 5200s	20Hz	15.3645
20160510b - 4120s	20Hz	12.8
20160511a - 2930s	20Hz	14.0792			Dependent Variable: Time from beginning stim to ma
20160511b - 2880s	20Hz	18.5538
20160513a - 3740s	20Hz	11.9319			Normality Test (Shapiro-Wilk)	Passed	(P = 0.778)
20160513b - 3480s	20Hz	5.49
20160623a - 4070s	20Hz	4.193			Equal Variance Test:	Passed	(P = 0.059)
20160623b - 2200s	20Hz	5.4853
20160706a - 2800s	20Hz	19.0971			Treatment Name	N	Missing	Mean	Std Dev	SEM
20160706b - 2590s	20Hz	9.4283			20Hz	12	0	12.597	5.387	1.555
20160506a - 6347s	10Hz	21.2503			10Hz	12	1	14.096	7.053	2.126
20160506b - 3690s	10Hz	14.6573			50Hz	12	3	4.584	2.575	0.858
20160510a - 5200s	10Hz	11.8959			5Hz	12	3	17.781	6.369	2.123
20160510b - 4120s	10Hz
20160511a - 2930s	10Hz	5.8981			Source of Variation	DF	SS	MS	F	P
20160511b - 2880s	10Hz	14.932			Between Subjects	11	500.984	45.544
20160513a - 3740s	10Hz	13.3791			Between Treatments	3	706.332	235.444	8.83	<0.001
20160513b - 3480s	10Hz	14.4186			Residual	26	693.23	26.663
20160623a - 4070s	10Hz	4.9613			Total	40	2036.72	50.918
20160623b - 2200s	10Hz	5.0829
20160706a - 2800s	10Hz	24.4868			The differences in the mean values among the treatment groups are greater than would be expected by chance; there is a statistically significant difference (P = <0.001). To isolate the group or groups that differ from the others use a multiple comparison procedure.
20160706b - 2590s	10Hz	24.0916
20160506a - 6347s	50Hz				Power of performed test with alpha = 0.050: 0.981
20160506b - 3690s	50Hz
20160510a - 5200s	50Hz	4.2313			Expected Mean Squares:
20160510b - 4120s	50Hz				Approximate DF Residual = 26.000
20160511a - 2930s	50Hz	2.6044			Expected MS(Subj) = var(res) + 3.364 var(Subj)
20160511b - 2880s	50Hz	3.3802			Expected MS(Treatment) = var(res) + var(Treatment)
20160513a - 3740s	50Hz	5.4515			Expected MS(Residual) = var(res)
20160513b - 3480s	50Hz	0
20160623a - 4070s	50Hz	5.1786
20160623b - 2200s	50Hz	4.7268			All Pairwise Multiple Comparison Procedures (Holm-Sidak method):
20160706a - 2800s	50Hz	9.292			Overall significance level = 0.05
20160706b - 2590s	50Hz	6.3917
20160506a - 6347s	5Hz	15.7393			Comparisons for factor: Stim frequency
20160506b - 3690s	5Hz				Comparison	Diff of Means	t	P	P<0.050
20160510a - 5200s	5Hz	29.3971			5Hz vs. 50Hz	12.327	4.738	<0.001	Yes
20160510b - 4120s	5Hz				10Hz vs. 50Hz	8.865	3.616	0.006	Yes
20160511a - 2930s	5Hz	12.1778			20Hz vs. 50Hz	7.348	3.103	0.018	Yes
20160511b - 2880s	5Hz	11.3116			5Hz vs. 20Hz	4.979	2.103	0.13	No
20160513a - 3740s	5Hz	23.2073			5Hz vs. 10Hz	3.462	1.412	0.311	No
20160513b - 3480s	5Hz				10Hz vs. 20Hz	1.517	0.689	0.497	No
20160623a - 4070s	5Hz	12.5583
20160623b - 2200s	5Hz	18.2934
20160706a - 2800s	5Hz	13.4967
20160706b - 2590s	5Hz	23.8502
Subject	Stim frequency	Time to max bradycardia			Time to max bradycardia
20160506a - 6347s	20Hz	4.4164			Friedman Repeated Measures Analysis of Variance on Ranks
20160506b - 3690s	20Hz
20160510a - 5200s	20Hz	1.5131
20160510b - 4120s	20Hz	4.3246
20160511a - 2930s	20Hz	3.411			Dependent Variable: End stim time to return to bas
20160511b - 2880s	20Hz	2.3674
20160513a - 3740s	20Hz	4.8383			Normality Test (Shapiro-Wilk)	Failed	(P < 0.050)
20160513b - 3480s	20Hz	3.4196
20160623a - 4070s	20Hz	2.9529			Group	N	Missing	Median	0.25	0.75
20160623b - 2200s	20Hz	1.0683			20Hz	8	0	2.66	1.626	3.392
20160706a - 2800s	20Hz	3.3344			10Hz	8	0	2.28	1.791	3.454
20160706b - 2590s	20Hz	1.9627			50Hz	8	0	0.617	0	2.009
20160506a - 6347s	10Hz				5Hz	8	0	3.18	2.135	4.216
20160506b - 3690s	10Hz
20160510a - 5200s	10Hz	3.4793
20160510b - 4120s	10Hz				Chi-square= 5.700 with 3 degrees of freedom. (P = 0.127)
20160511a - 2930s	10Hz	1.808
20160511b - 2880s	10Hz	2.7307			The differences in the median values among the treatment groups are not great enough to exclude the possibility that the difference is due to random sampling variability; there is not a statistically significant difference (P = 0.127)
20160513a - 3740s	10Hz	3.3782
20160513b - 3480s	10Hz	2.6871
20160623a - 4070s	10Hz	3.7644
20160623b - 2200s	10Hz	1.3193
20160706a - 2800s	10Hz	1.7849
20160706b - 2590s	10Hz	1.8302
20160506a - 6347s	50Hz
20160506b - 3690s	50Hz
20160510a - 5200s	50Hz	0
20160510b - 4120s	50Hz
20160511a - 2930s	50Hz	0
20160511b - 2880s	50Hz	1.2881
20160513a - 3740s	50Hz	0
20160513b - 3480s	50Hz	0
20160623a - 4070s	50Hz	1.2347
20160623b - 2200s	50Hz	0
20160706a - 2800s	50Hz	4.6058
20160706b - 2590s	50Hz	2.2495
20160506a - 6347s	5Hz	4.411
20160506b - 3690s	5Hz
20160510a - 5200s	5Hz	1.9905
20160510b - 4120s	5Hz
20160511a - 2930s	5Hz	1.2416
20160511b - 2880s	5Hz	3.8393
20160513a - 3740s	5Hz	3.07
20160513b - 3480s	5Hz
20160623a - 4070s	5Hz	4.3416
20160623b - 2200s	5Hz	4.9988
20160706a - 2800s	5Hz	2.5687
20160706b - 2590s	5Hz	3.2898

## Sheet: Fig3F and S1E
Subject	Stim period	Stim frequency	SNA		SNA 5Hz
20160506a	Before	5Hz	4.891		Friedman Repeated Measures Analysis of Variance on Ranks
20160510a	Before	5Hz	8.6062
20160511a	Before	5Hz	4.0325		Dependent Variable: total intSNA
20160511b	Before	5Hz	3.3634
20160513a	Before	5Hz	5.7819		Normality Test (Shapiro-Wilk)	Failed	(P < 0.050)
20160623a	Before	5Hz	5.3544		Group	N	Missing	Median	0.25	0.75
20160623b	Before	5Hz	6.5821		Before	9	0	4.891	3.403	6.182
20160706a	Before	5Hz	3.4433		Peak dec during	9	0	4.139	3.154	5.776
20160706b	Before	5Hz	2.2987		Peak inc during	9	0	4.644	3.217	6.099
20160506a	Peak dec during	5Hz	4.1394		End during	9	0	4.644	3.236	6.081
					After	9	0	4.975	3.412	6.254
20160510a	Peak dec during	5Hz	7.1731
20160511a	Peak dec during	5Hz	3.5871		Chi-square= 26.584 with 4 degrees of freedom. (P = <0.001)
20160511b	Peak dec during	5Hz	3.0573
20160513a	Peak dec during	5Hz	5.4273		The differences in the median values among the treatment groups are greater than would be expected by chance; there is a statistically significant difference (P = <0.001)
20160623a	Peak dec during	5Hz	5.2405		To isolate the group or groups that differ from the others use a multiple comparison procedure.
20160623b	Peak dec during	5Hz	6.1243
20160706a	Peak dec during	5Hz	3.2512
20160706b	Peak dec during	5Hz	1.5761		All Pairwise Multiple Comparison Procedures (Tukey Test):
20160506a	Peak inc during	5Hz	4.6437
					Comparison	Diff of Ranks	q	P<0.05
20160510a	Peak inc during	5Hz	8.3222		After vs Peak dec during	30.5	6.43	Yes
					After vs End during	16.5	3.479	No
20160511a	Peak inc during	5Hz	3.8808		After vs Peak inc during	15	3.162	Do Not Test
20160511b	Peak inc during	5Hz	3.1831		After vs Before	3	0.632	Do Not Test
20160513a	Peak inc during	5Hz	5.5484		Before vs Peak dec during	27.5	5.798	Yes
					Before vs End during	13.5	2.846	Do Not Test
20160623a	Peak inc during	5Hz	5.383		Before vs Peak inc during	12	2.53	Do Not Test
20160623b	Peak inc during	5Hz	6.6498		Peak inc duri vs Peak dec duri	15.5	3.268	No
20160706a	Peak inc during	5Hz	3.2512		Peak inc during vs End during	1.5	0.316	Do Not Test
20160706b	Peak inc during	5Hz	2.1745		End during vs Peak dec during	14	2.951	Do Not Test
20160506a	End during	5Hz	4.6437
20160510a	End during	5Hz	8.0077		Note: The multiple comparisons on ranks do not include an adjustment for ties.
20160511a	End during	5Hz	3.9218		A result of "Do Not Test" occurs for a comparison when no significant difference is found between the two rank sums that enclose that comparison. For example, if you had four rank sums sorted in order, and found no significant difference between rank sums 4 vs. 2, then you would not test 4 vs. 3 and 3 vs. 2, but still test 4 vs. 1 and 3 vs. 1 (4 vs. 3 and 3 vs. 2 are enclosed by 4 vs. 2: 4 3 2 1)…
20160511b	End during	5Hz	3.1353
20160513a	End during	5Hz	5.6813
20160623a	End during	5Hz	5.2998
20160623b	End during	5Hz	6.4812
20160706a	End during	5Hz	3.3369
20160706b	End during	5Hz	2.1809
20160506a	After	5Hz	4.9754
20160510a	After	5Hz	8.7276
20160511a	After	5Hz	3.9166
20160511b	After	5Hz	3.3816
20160513a	After	5Hz	5.9251
20160623a	After	5Hz	5.3888
20160623b	After	5Hz	6.5836
20160706a	After	5Hz	3.4416
20160706b	After	5Hz	2.2765
Subject	Stim period	Stim frequency	SNA		SNA 10Hz
20160506a	Before	10Hz	6.4631		Friedman Repeated Measures Analysis of Variance on Ranks
20160506b	Before	10Hz	5.5749
20160510a	Before	10Hz	8.5199
20160511a	Before	10Hz	4.8924		Dependent Variable: Col 9
20160511b	Before	10Hz	3.4289
20160513a	Before	10Hz	5.5587		Normality Test (Shapiro-Wilk)	Passed	(P = 0.068)
20160513b	Before	10Hz	7.3592
20160623a	Before	10Hz	5.3405		Equal Variance Test:	Failed	(P < 0.050)
20160623b	Before	10Hz	5.9366
20160706a	Before	10Hz	3.8686		Group	N	Missing	Median	0.25	0.75
20160706b	Before	10Hz	2.1128		Before	11	0	5.559	3.869	6.463
20160506a	Peak dec during	10Hz	5.2589		Peak dec during	11	0	3.805	2.4	5.118
20160506b	Peak dec during	10Hz	3.4435		Peak inc during	11	0	5.442	3.805	6.298
20160510a	Peak dec during	10Hz	5.8858		End during	11	0	5.258	3.615	6.303
					After	11	0	5.657	3.61	6.762
20160511a	Peak dec during	10Hz	3.8047
20160511b	Peak dec during	10Hz	2.4002
20160513a	Peak dec during	10Hz	3.6623		Chi-square= 23.560 with 4 degrees of freedom. (P = <0.001)
20160513b	Peak dec during	10Hz	5.1178
20160623a	Peak dec during	10Hz	4.3301		The differences in the median values among the treatment groups are greater than would be expected by chance; there is a statistically significant difference (P = <0.001)
20160623b	Peak dec during	10Hz	4.8109
20160706a	Peak dec during	10Hz	2.2707		To isolate the group or groups that differ from the others use a multiple comparison procedure.
20160706b	Peak dec during	10Hz	1.231
20160506a	Peak inc during	10Hz	6.1872
20160506b	Peak inc during	10Hz	5.2253		All Pairwise Multiple Comparison Procedures (Tukey Test):
20160510a	Peak inc during	10Hz	8.1106
					Comparison	Diff of Ranks	q	P<0.05
20160511a	Peak inc during	10Hz	3.8047		Before vs Peak dec during	31	5.911	Yes
20160511b	Peak inc during	10Hz	2.4002		Before vs End during	10	1.907	No
20160513a	Peak inc during	10Hz	5.6442		Before vs Peak inc during	9	1.716	Do Not Test
20160513b	Peak inc during	10Hz	7.6583		Before vs After	0	0	Do Not Test
20160623a	Peak inc during	10Hz	5.4421		After vs Peak dec during	31	5.911	Yes
20160623b	Peak inc during	10Hz	6.298		After vs End during	10	1.907	Do Not Test
20160706a	Peak inc during	10Hz	3.8111		After vs Peak inc during	9	1.716	Do Not Test
20160706b	Peak inc during	10Hz	2.003		Peak inc duri vs Peak dec duri	22	4.195	Yes
20160506a	End during	10Hz	6.2372		Peak inc during vs End during	1	0.191	Do Not Test
20160506b	End during	10Hz	5.0105		End during vs Peak dec during	21	4.005	Yes
20160510a	End during	10Hz	8.3834
20160511a	End during	10Hz	4.63		Note: The multiple comparisons on ranks do not include an adjustment for ties.
20160511b	End during	10Hz	3.3276
20160513a	End during	10Hz	5.6364		A result of "Do Not Test" occurs for a comparison when no significant difference is found between the two rank sums that enclose that comparison. For example, if you had four rank sums sorted in order, and found no significant difference between rank sums 4 vs. 2, then you would not test 4 vs. 3 and 3 vs. 2, but still test 4 vs. 1 and 3 vs. 1 (4 vs. 3 and 3 vs. 2 are enclosed by 4 vs. 2: 4 3 2 1)…
20160513b	End during	10Hz	6.84
20160623a	End during	10Hz	5.2585
20160623b	End during	10Hz	6.3026
20160706a	End during	10Hz	3.6149
20160706b	End during	10Hz	2.021
20160506a	After	10Hz	6.7624
20160506b	After	10Hz	5.657
20160510a	After	10Hz	8.5117
20160511a	After	10Hz	4.5599
20160511b	After	10Hz	3.39
20160513a	After	10Hz	5.7059
20160513b	After	10Hz	7.5134
20160623a	After	10Hz	5.3651
20160623b	After	10Hz	6.174
20160706a	After	10Hz	3.6097
20160706b	After	10Hz	2.0734
Subject	Stim period	Stim frequency	SNA		SNA 20Hz
20160506a	Before	20Hz	6.0076		Friedman Repeated Measures Analysis of Variance on Ranks
20160506b	Before	20Hz	5.4172
20160510a	Before	20Hz	7.8275
20160510b	Before	20Hz	4.5999
20160511a	Before	20Hz	5.1127		Dependent Variable: Col 14
20160511b	Before	20Hz	3.8517
20160513a	Before	20Hz	5.7665		Normality Test (Shapiro-Wilk)	Failed	(P < 0.050)
20160513b	Before	20Hz	7.5131
20160623a	Before	20Hz	5.4478		Group	N	Missing	Median	0.25	0.75
20160623b	Before	20Hz	4.8767		Before	12	0	5.432	4.669	5.975
20160706a	Before	20Hz	5.8768		Peak dec during	12	0	2.619	2.233	3.878
20160706b	Before	20Hz	2.1239		Peak inc during	12	0	5.974	4.92	6.61
20160506a	Peak dec during	20Hz	3.9974		End during	12	0	5.304	4.534	6.192
20160506b	Peak dec during	20Hz	3.6826		After	12	0	5.404	4.745	6.098
20160510a	Peak dec during	20Hz	3.9428
20160510b	Peak dec during	20Hz	2.3427
20160511a	Peak dec during	20Hz	4.6762		Chi-square= 36.333 with 4 degrees of freedom. (P = <0.001)
20160511b	Peak dec during	20Hz	2.136
20160513a	Peak dec during	20Hz	2.5597		The differences in the median values among the treatment groups are greater than would be expected by chance; there is a statistically significant difference (P = <0.001)
20160513b	Peak dec during	20Hz	2.368
20160623a	Peak dec during	20Hz	2.1966		To isolate the group or groups that differ from the others use a multiple comparison procedure.
20160623b	Peak dec during	20Hz	2.6782
20160706a	Peak dec during	20Hz	3.3167
20160706b	Peak dec during	20Hz	1.1541		All Pairwise Multiple Comparison Procedures (Tukey Test):
20160506a	Peak inc during	20Hz	6.4173
20160506b	Peak inc during	20Hz	6.1144		Comparison	Diff of Ranks	q	P<0.05
20160510a	Peak inc during	20Hz	8.936		Peak inc duri vs Peak dec duri	46	8.398	Yes
20160510b	Peak inc during	20Hz	4.711		Peak inc during vs After	24	4.382	Yes
20160511a	Peak inc during	20Hz	5.6852		Peak inc during vs End during	23	4.199	Yes
20160511b	Peak inc during	20Hz	4		Peak inc during vs Before	17	3.104	No
20160513a	Peak inc during	20Hz	6.6739		Before vs Peak dec during	29	5.295	Yes
20160513b	Peak inc during	20Hz	8.2638		Before vs After	7	1.278	No
20160623a	Peak inc during	20Hz	5.8329		Before vs End during	6	1.095	Do Not Test
20160623b	Peak inc during	20Hz	6.1362		End during vs Peak dec during	23	4.199	Yes
20160706a	Peak inc during	20Hz	5.5478		End during vs After	1	0.183	Do Not Test
20160706b	Peak inc during	20Hz	2.3562		After vs Peak dec during	22	4.017	Yes
20160506a	End during	20Hz	6.369
20160506b	End during	20Hz	5.5818
20160510a	End during	20Hz	7.9213		Note: The multiple comparisons on ranks do not include an adjustment for ties.
20160510b	End during	20Hz	4.4057
20160511a	End during	20Hz	4.918		A result of "Do Not Test" occurs for a comparison when no significant difference is found between the two rank sums that enclose that comparison. For example, if you had four rank sums sorted in order, and found no significant difference between rank sums 4 vs. 2, then you would not test 4 vs. 3 and 3 vs. 2, but still test 4 vs. 1 and 3 vs. 1 (4 vs. 3 and 3 vs. 2 are enclosed by 4 vs. 2: 4 3 2 1)…
20160511b	End during	20Hz	3.8375
20160513a	End during	20Hz	5.6625
20160513b	End during	20Hz	7.3689
20160623a	End during	20Hz	5.0751
20160623b	End during	20Hz	5.457
20160706a	End during	20Hz	5.1508
20160706b	End during	20Hz	2.0288
20160506a	After	20Hz	6.268
20160506b	After	20Hz	5.4628
20160510a	After	20Hz	7.8124
20160510b	After	20Hz	4.7657
20160511a	After	20Hz	4.9818
20160511b	After	20Hz	3.6926
20160513a	After	20Hz	5.589
20160513b	After	20Hz	7.2599
20160623a	After	20Hz	5.3449
20160623b	After	20Hz	5.5894
20160706a	After	20Hz	4.738
20160706b	After	20Hz	2.0903
Subject	Stim period	Stim frequency	SNA		SNA 50Hz
					Friedman Repeated Measures Analysis of Variance on Ranks
20160510a	Before	50Hz	7.4884
20160511a	Before	50Hz	4.2517		Dependent Variable: Col 19
20160511b	Before	50Hz	3.4203
20160513a	Before	50Hz	5.6847		Normality Test (Shapiro-Wilk)	Failed	(P < 0.050)
20160513b	Before	50Hz	7.5082
20160623a	Before	50Hz	5.3562		Group	N	Missing	Median	0.25	0.75
20160623b	Before	50Hz	6.4051		Before	9	0	5.356	3.423	6.947
20160706a	Before	50Hz	3.4256		Peak dec during	9	0	3.005	2.063	3.725
20160706b	Before	50Hz	2.3281		Peak inc during	9	0	5.705	3.663	7.628
					End during	9	0	5.37	3.61	6.998
					After	9	0	5.358	3.399	6.955
20160510a	Peak dec during	50Hz	6.4143
20160511a	Peak dec during	50Hz	3.0051		Chi-square= 28.800 with 4 degrees of freedom. (P = <0.001)
20160511b	Peak dec during	50Hz	1.8508
20160513a	Peak dec during	50Hz	3.532		The differences in the median values among the treatment groups are greater than would be expected by chance; there is a statistically significant difference (P = <0.001)
20160513b	Peak dec during	50Hz	2.7485
20160623a	Peak dec during	50Hz	3.2632		To isolate the group or groups that differ from the others use a multiple comparison procedure.
20160623b	Peak dec during	50Hz	3.9183
20160706a	Peak dec during	50Hz	2.2746
20160706b	Peak dec during	50Hz	1.4705		All Pairwise Multiple Comparison Procedures (Tukey Test):
					Comparison	Diff of Ranks	q	P<0.05
20160510a	Peak inc during	50Hz	7.6224		Peak inc duri vs Peak dec duri	35	7.379	Yes
					Peak inc during vs Before	20	4.216	Yes
20160511a	Peak inc during	50Hz	4.5875		Peak inc during vs After	18	3.795	No
20160511b	Peak inc during	50Hz	3.6098		Peak inc during vs End during	12	2.53	Do Not Test
20160513a	Peak inc during	50Hz	6.5327		End during vs Peak dec during	23	4.849	Yes
20160513b	Peak inc during	50Hz	8.9481		End during vs Before	8	1.687	No
20160623a	Peak inc during	50Hz	5.7049		End during vs After	6	1.265	Do Not Test
20160623b	Peak inc during	50Hz	7.6341		After vs Peak dec during	17	3.584	No
20160706a	Peak inc during	50Hz	3.7153		After vs Before	2	0.422	Do Not Test
20160706b	Peak inc during	50Hz	2.568		Before vs Peak dec during	15	3.162	Do Not Test
20160510a	End during	50Hz	7.6157		Note: The multiple comparisons on ranks do not include an adjustment for ties.
20160511a	End during	50Hz	4.3287		A result of "Do Not Test" occurs for a comparison when no significant difference is found between the two rank sums that enclose that comparison. For example, if you had four rank sums sorted in order, and found no significant difference between rank sums 4 vs. 2, then you would not test 4 vs. 3 and 3 vs. 2, but still test 4 vs. 1 and 3 vs. 1 (4 vs. 3 and 3 vs. 2 are enclosed by 4 vs. 2: 4 3 2 1)…
20160511b	End during	50Hz	3.5198
20160513a	End during	50Hz	5.6841
20160513b	End during	50Hz	7.4759
20160623a	End during	50Hz	5.3696
20160623b	End during	50Hz	6.5204
20160706a	End during	50Hz	3.6997
20160706b	End during	50Hz	2.4031
20160510a	After	50Hz	7.6749
20160511a	After	50Hz	4.1968
20160511b	After	50Hz	3.3526
20160513a	After	50Hz	5.563
20160513b	After	50Hz	7.402
20160623a	After	50Hz	5.3576
20160623b	After	50Hz	6.5072
20160706a	After	50Hz	3.4448
20160706b	After	50Hz	2.429
Subject	Stim frequency	SNA decrease duration			SNA decrease duration
20160506a - 6347s	20Hz	13.8943			One Way Repeated Measures Analysis of Variance
20160506b - 3690s	20Hz	14.9663
20160510a - 5200s	20Hz	7.4664
20160510b - 4120s	20Hz	12.3036
20160511a - 2930s	20Hz	11.3783			Dependent Variable: Duration max decrease intSNA (
20160511b - 2880s	20Hz	7.3882
20160513a - 3740s	20Hz	9.8272			Normality Test (Shapiro-Wilk)	Passed	(P = 0.352)
20160513b - 3480s	20Hz	11.0774
20160623a - 4070s	20Hz	10.2771			Equal Variance Test:	Passed	(P = 0.109)
20160623b - 2200s	20Hz	9.2201
20160706a - 2800s	20Hz	10.3653			Treatment Name	N	Missing	Mean	Std Dev	SEM
20160706b - 2590s	20Hz	9.4989			20Hz	12	0	10.639	2.289	0.661
20160506a - 6347s	10Hz				10Hz	12	3	7.795	3.928	1.309
20160506b - 3690s	10Hz	2.6923			50Hz	12	3	2.792	0.866	0.289
20160510a - 5200s	10Hz	4.4718			5Hz	12	4	1.885	1.924	0.68
20160510b - 4120s	10Hz
20160511a - 2930s	10Hz	5.4797			Source of Variation	DF	SS	MS	F	P
20160511b - 2880s	10Hz				Between Subjects	11	32.008	2.91
20160513a - 3740s	10Hz	14.4315			Between Treatments	3	445.808	148.603	18.882	<0.001
20160513b - 3480s	10Hz	10.7826			Residual	23	181.009	7.87
20160623a - 4070s	10Hz	8.2691			Total	37	725.651	19.612
20160623b - 2200s	10Hz	5.2648
20160706a - 2800s	10Hz	12.2443			The differences in the mean values among the treatment groups are greater than would be expected by chance; there is a statistically significant difference (P = <0.001). To isolate the group or groups that differ from the others use a multiple comparison procedure.
20160706b - 2590s	10Hz	6.5192
20160506a - 6347s	50Hz				Power of performed test with alpha = 0.050: 1.000
20160506b - 3690s	50Hz
20160510a - 5200s	50Hz	2.1156			Expected Mean Squares:
20160510b - 4120s	50Hz				Approximate DF Residual = 23.000
20160511a - 2930s	50Hz	2.7641			Expected MS(Subj) = var(res) + 3.091 var(Subj)
20160511b - 2880s	50Hz	2.804			Expected MS(Treatment) = var(res) + var(Treatment)
20160513a - 3740s	50Hz	2.9548			Expected MS(Residual) = var(res)
20160513b - 3480s	50Hz	2.9905
20160623a - 4070s	50Hz	1.8993
20160623b - 2200s	50Hz	4.8353			All Pairwise Multiple Comparison Procedures (Holm-Sidak method):
20160706a - 2800s	50Hz	2.6742			Overall significance level = 0.05
20160706b - 2590s	50Hz	2.09
20160506a - 6347s	5Hz	0.9184			Comparisons for factor: Stim frequency
20160506b - 3690s	5Hz				Comparison	Diff of Means	t	P	P<0.050
20160510a - 5200s	5Hz	2.1505			20Hz vs. 5Hz	8.576	6.38	<0.001	Yes
20160510b - 4120s	5Hz				20Hz vs. 50Hz	7.605	5.891	<0.001	Yes
20160511a - 2930s	5Hz				10Hz vs. 5Hz	6.052	4.124	0.002	Yes
20160511b - 2880s	5Hz	6.0002			10Hz vs. 50Hz	5.081	3.581	0.005	Yes
20160513a - 3740s	5Hz	0			20Hz vs. 10Hz	2.524	1.96	0.121	No
20160513b - 3480s	5Hz				50Hz vs. 5Hz	0.971	0.661	0.515	No
20160623a - 4070s	5Hz	1.998
20160623b - 2200s	5Hz	1.3662
20160706a - 2800s	5Hz	0
20160706b - 2590s	5Hz	2.6476

## Sheet: Fig3G and S1F
Subject	Stim period	Stim frequency	mean PP		mean PP 5Hz
20160506a	Before	5Hz	66.1603		One Way Repeated Measures Analysis of Variance
20160510a	Before	5Hz	78.2296
20160511a	Before	5Hz	69.04		Dependent Variable: mean PP
20160511b	Before	5Hz	67.1266
20160513a	Before	5Hz	73.2861		Normality Test (Shapiro-Wilk)	Passed	(P = 0.066)
20160623a	Before	5Hz	86.3009		Equal Variance Test:	Passed	(P = 0.569)
20160623b	Before	5Hz	81.7698
20160706a	Before	5Hz	67.3355		Treatment Name	N	Missing	Mean	Std Dev	SEM
20160706b	Before	5Hz	72.5816		Before	9	0	73.537	7.14	2.38
20160506a	Peak inc during	5Hz	62.8786		Peak inc during	9	0	70.712	7.252	2.417
					End during	9	0	73.159	7.9	2.633
20160510a	Peak inc during	5Hz	76.2713		After	9	0	73.775	7.421	2.474
20160511a	Peak inc during	5Hz	65.7635		Source of Variation	DF	SS	MS	F	P
20160511b	Peak inc during	5Hz	64.2612		Between Subjects	8	1759.51	219.938
20160513a	Peak inc during	5Hz	70.4047		Between Treatments	3	53.857	17.952	48.717	<0.001
					Residual	24	8.844	0.369
20160623a	Peak inc during	5Hz	83.6411		Total	35	1822.21
20160623b	Peak inc during	5Hz	78.4607
20160706a	Peak inc during	5Hz	64.8525		The differences in the mean values among the treatment groups are greater than would be expected by chance; there is a statistically significant difference (P = <0.001). To isolate the group or groups that differ from the others use a multiple comparison procedure.
20160706b	Peak inc during	5Hz	69.8714
20160506a	End during	5Hz	63.5307		Power of performed test with alpha = 0.050: 1.000
20160510a	End during	5Hz	78.0695
					All Pairwise Multiple Comparison Procedures (Holm-Sidak method):
20160511a	End during	5Hz	68.7624		Overall significance level = 0.05
20160511b	End during	5Hz	67.031
20160513a	End during	5Hz	72.7908		Comparisons for factor: Stim period
					Comparison	Diff of Means	t	P	P<0.050
20160623a	End during	5Hz	87.2702		After vs. Peak inc during	3.064	10.707	<0.001	Yes
20160623b	End during	5Hz	82.1057		Before vs. Peak inc during	2.825	9.872	<0.001	Yes
20160706a	End during	5Hz	66.3952		End during vs. Peak inc during	2.447	8.552	<0.001	Yes
20160706b	End during	5Hz	72.4742		After vs. End during	0.617	2.155	0.119	No
20160506a	After	5Hz	66.4537		Before vs. End during	0.378	1.32	0.359	No
					After vs. Before	0.239	0.834	0.412	No
20160510a	After	5Hz	78.243
20160511a	After	5Hz	68.682
20160511b	After	5Hz	67.1088
20160513a	After	5Hz	74.8727
20160623a	After	5Hz	87.2259
20160623b	After	5Hz	81.9468
20160706a	After	5Hz	66.9981
20160706b	After	5Hz	72.4482
Subject	Stim period	Stim frequency	mean PP		mean PP 10Hz
20160506a	Before	10Hz	64.4328		Friedman Repeated Measures Analysis of Variance on Ranks
20160506b	Before	10Hz	70.1514
20160510a	Before	10Hz	78.2374
20160511a	Before	10Hz	67.3585		Dependent Variable: mean PP
20160511b	Before	10Hz	66.3507
20160513a	Before	10Hz	74.7328		Normality Test (Shapiro-Wilk)	Passed	(P = 0.331)
20160513b	Before	10Hz	75.2038
20160623a	Before	10Hz	87.1595		Equal Variance Test:	Failed	(P < 0.050)
20160623b	Before	10Hz	81.4309
20160706a	Before	10Hz	68.6251		Group	N	Missing	Median	0.25	0.75
20160706b	Before	10Hz	71.6857		Before	11	0	71.686	67.359	78.237
20160506a	Peak inc during	10Hz	60.787		Peak inc during	11	0	68.824	63.678	75.349
20160506b	Peak inc during	10Hz	64.9087		End during	11	0	72.344	68.574	78.49
20160510a	Peak inc during	10Hz	75.3491		After	11	0	72.122	68.349	77.828
20160511a	Peak inc during	10Hz	63.6777
20160511b	Peak inc during	10Hz	63.5448		Chi-square= 22.091 with 3 degrees of freedom. (P = <0.001)
20160513a	Peak inc during	10Hz	69.5832
20160513b	Peak inc during	10Hz	69.5123		The differences in the median values among the treatment groups are greater than would be expected by chance; there is a statistically significant difference (P = <0.001)
20160623a	Peak inc during	10Hz	83.3986
20160623b	Peak inc during	10Hz	76.9675		To isolate the group or groups that differ from the others use a multiple comparison procedure.
20160706a	Peak inc during	10Hz	65.2459
20160706b	Peak inc during	10Hz	68.8241
20160506a	End during	10Hz	64.0484		All Pairwise Multiple Comparison Procedures (Tukey Test):
20160506b	End during	10Hz	70.3421
20160510a	End during	10Hz	78.4895		Comparison	Diff of Ranks	q	P<0.05
					End during vs Peak inc during	26	6.072	Yes
20160511a	End during	10Hz	68.9518		End during vs Before	9	2.102	No
20160511b	End during	10Hz	66.2376		End during vs After	3	0.701	Do Not Test
20160513a	End during	10Hz	75.8035		After vs Peak inc during	23	5.372	Yes
20160513b	End during	10Hz	77.1703		After vs Before	6	1.401	Do Not Test
20160623a	End during	10Hz	87.9614		Before vs Peak inc during	17	3.97	Yes
20160623b	End during	10Hz	84.4457
20160706a	End during	10Hz	68.5739
20160706b	End during	10Hz	72.3437		Note: The multiple comparisons on ranks do not include an adjustment for ties.
20160506a	After	10Hz	64.2349
20160506b	After	10Hz	71.0962		A result of "Do Not Test" occurs for a comparison when no significant difference is found between the two rank sums that enclose that comparison. For example, if you had four rank sums sorted in order, and found no significant difference between rank sums 4 vs. 2, then you would not test 4 vs. 3 and 3 vs. 2, but still test 4 vs. 1 and 3 vs. 1 (4 vs. 3 and 3 vs. 2 are enclosed by 4 vs. 2: 4 3 2 1)…
20160510a	After	10Hz	77.8281
20160511a	After	10Hz	68.3492
20160511b	After	10Hz	66.6382
20160513a	After	10Hz	74.9778
20160513b	After	10Hz	74.0448
20160623a	After	10Hz	87.2302
20160623b	After	10Hz	81.5998
20160706a	After	10Hz	69.8654
20160706b	After	10Hz	72.1222
Subject	Stim period	Stim frequency	mean PP		mean PP 20Hz
20160506a	Before	20Hz	64.4856		Friedman Repeated Measures Analysis of Variance on Ranks
20160506b	Before	20Hz	71.5297
20160510a	Before	20Hz	72.2727
20160510b	Before	20Hz	68.0726
20160511a	Before	20Hz	66.5759		Dependent Variable: mean PP
20160511b	Before	20Hz	65.658
20160513a	Before	20Hz	74.8357		Normality Test (Shapiro-Wilk)	Failed	(P < 0.050)
20160513b	Before	20Hz	76.1198
20160623a	Before	20Hz	86.9447		Group	N	Missing	Median	0.25	0.75
20160623b	Before	20Hz	80.1835		Before	12	0	71.772	66.95	75.799
20160706a	Before	20Hz	70.3258		Peak inc during	12	0	67.209	63.148	69.958
20160706b	Before	20Hz	72.0142		End during	12	0	74.15	69.92	80.114
20160506a	Peak inc during	20Hz	60.7546		After	12	0	72.135	67.33	75.552
20160506b	Peak inc during	20Hz	64.1499
20160510a	Peak inc during	20Hz	69.7906
20160510b	Peak inc during	20Hz	64.0411		Chi-square= 28.900 with 3 degrees of freedom. (P = <0.001)
20160511a	Peak inc during	20Hz	62.5486
20160511b	Peak inc during	20Hz	62.8505		The differences in the median values among the treatment groups are greater than would be expected by chance; there is a statistically significant difference (P = <0.001)
20160513a	Peak inc during	20Hz	67.9299
20160513b	Peak inc during	20Hz	70.0134		To isolate the group or groups that differ from the others use a multiple comparison procedure.
20160623a	Peak inc during	20Hz	82.879
20160623b	Peak inc during	20Hz	76.306
20160706a	Peak inc during	20Hz	66.4871		All Pairwise Multiple Comparison Procedures (Tukey Test):
20160706b	Peak inc during	20Hz	68.6508
20160506a	End during	20Hz	64.1103		Comparison	Diff of Ranks	q	P<0.05
20160506b	End during	20Hz	79.0502		End during vs Peak inc during	33	7.379	Yes
20160510a	End during	20Hz	73.616		End during vs Before	17	3.801	Yes
20160510b	End during	20Hz	72.0638		End during vs After	10	2.236	No
20160511a	End during	20Hz	69.4836		After vs Peak inc during	23	5.143	Yes
20160511b	End during	20Hz	69.9463		After vs Before	7	1.565	No
20160513a	End during	20Hz	78.3927		Before vs Peak inc during	16	3.578	No
20160513b	End during	20Hz	80.468
20160623a	End during	20Hz	91.8878
20160623b	End during	20Hz	85.6469		Note: The multiple comparisons on ranks do not include an adjustment for ties.
20160706a	End during	20Hz	69.911
20160706b	End during	20Hz	74.6841
20160506a	After	20Hz	65.7209
20160506b	After	20Hz	71.9699
20160510a	After	20Hz	72.8283
20160510b	After	20Hz	68.5409
20160511a	After	20Hz	66.9257
20160511b	After	20Hz	66.055
20160513a	After	20Hz	74.94
20160513b	After	20Hz	75.7559
20160623a	After	20Hz	86.9641
20160623b	After	20Hz	81.4
20160706a	After	20Hz	69.3067
20160706b	After	20Hz	72.3008
Subject	Stim period	Stim frequency	mean PP		mean PP 50Hz
					Friedman Repeated Measures Analysis of Variance on Ranks
20160510a	Before	50Hz	73.9117
20160511a	Before	50Hz	67.9766		Dependent Variable: mean PP
20160511b	Before	50Hz	66.6239
20160513a	Before	50Hz	73.7741		Normality Test (Shapiro-Wilk)	Passed	(P = 0.781)
20160513b	Before	50Hz	74.3704
20160623a	Before	50Hz	86.8142		Equal Variance Test:	Failed	(P < 0.050)
20160623b	Before	50Hz	81.5565
20160706a	Before	50Hz	67.3311		Group	N	Missing	Median	0.25	0.75
20160706b	Before	50Hz	71.8866		Before	9	0	73.774	67.654	77.963
					Peak inc during	9	0	70.545	66.275	74.67
					End during	9	0	74.407	69.088	80.677
20160510a	Peak inc during	50Hz	72.1695		After	9	0	73.082	67.823	77.896
20160511a	Peak inc during	50Hz	65.7354
20160511b	Peak inc during	50Hz	65.4562		Chi-square= 22.733 with 3 degrees of freedom. (P = <0.001)
20160513a	Peak inc during	50Hz	70.5278
20160513b	Peak inc during	50Hz	70.5452		The differences in the median values among the treatment groups are greater than would be expected by chance; there is a statistically significant difference (P = <0.001)
20160623a	Peak inc during	50Hz	84.0219
20160623b	Peak inc during	50Hz	77.1701		To isolate the group or groups that differ from the others use a multiple comparison procedure.
20160706a	Peak inc during	50Hz	66.8148
20160706b	Peak inc during	50Hz	70.7521
					All Pairwise Multiple Comparison Procedures (Tukey Test):
20160510a	End during	50Hz	74.4075		Comparison	Diff of Ranks	q	P<0.05
					End during vs Peak inc during	26	6.713	Yes
20160511a	End during	50Hz	70.4732		End during vs Before	13	3.357	No
20160511b	End during	50Hz	67.4968		End during vs After	11	2.84	Do Not Test
20160513a	End during	50Hz	76.7537		After vs Peak inc during	15	3.873	Yes
20160513b	End during	50Hz	75.8901		After vs Before	2	0.516	Do Not Test
20160623a	End during	50Hz	90.4826		Before vs Peak inc during	13	3.357	No
20160623b	End during	50Hz	84.6004
20160706a	End during	50Hz	67.7019
20160706b	End during	50Hz	71.9099		Note: The multiple comparisons on ranks do not include an adjustment for ties.
					A result of "Do Not Test" occurs for a comparison when no significant difference is found between the two rank sums that enclose that comparison. For example, if you had four rank sums sorted in order, and found no significant difference between rank sums 4 vs. 2, then you would not test 4 vs. 3 and 3 vs. 2, but still test 4 vs. 1 and 3 vs. 1 (4 vs. 3 and 3 vs. 2 are enclosed by 4 vs. 2: 4 3 2 1)…
20160510a	After	50Hz	73.9558
20160511a	After	50Hz	68.3099
20160511b	After	50Hz	65.9877
20160513a	After	50Hz	73.3407
20160513b	After	50Hz	73.0817
20160623a	After	50Hz	86.1959
20160623b	After	50Hz	81.8365
20160706a	After	50Hz	67.3369
20160706b	After	50Hz	71.9867
Subject	Stim frequency	PP decrease duration			PP decrease duration
20160506a - 6347s	20Hz	12.3577			One Way Repeated Measures Analysis of Variance
20160506b - 3690s	20Hz	11.5855
20160510a - 5200s	20Hz	7.1649
20160510b - 4120s	20Hz	9.6994
20160511a - 2930s	20Hz	9.7488			Dependent Variable: time to max PP dec
20160511b - 2880s	20Hz	7.325
20160513a - 3740s	20Hz	8.4389			Normality Test (Shapiro-Wilk)	Passed	(P = 0.777)
20160513b - 3480s	20Hz	9.6363
20160623a - 4070s	20Hz	11.7347			Equal Variance Test:	Passed	(P = 0.907)
20160623b - 2200s	20Hz	3.1967
20160706a - 2800s	20Hz	10.834			Treatment Name	N	Missing	Mean	Std Dev	SEM
20160706b - 2590s	20Hz	11.23			20Hz	12	0	9.413	2.582	0.745
20160506a - 6347s	10Hz	13.6771			10Hz	12	1	9.379	3.983	1.201
20160506b - 3690s	10Hz	3.0318			50Hz	12	3	4.309	1.535	0.512
20160510a - 5200s	10Hz	8.7964			5Hz	12	4	15.25	2.509	0.887
20160510b - 4120s	10Hz
20160511a - 2930s	10Hz	8.032			Source of Variation	DF	SS	MS	F	P
20160511b - 2880s	10Hz	10.3798			Between Subjects	11	131.244	11.931
20160513a - 3740s	10Hz	11.061			Between Treatments	3	458.425	152.808	23.342	<0.001
20160513b - 3480s	10Hz	10.7252			Residual	25	163.661	6.546
20160623a - 4070s	10Hz	3.9085			Total	39	801.922	20.562
20160623b - 2200s	10Hz	5.3127
20160706a - 2800s	10Hz	13.5594			The differences in the mean values among the treatment groups are greater than would be expected by chance; there is a statistically significant difference (P = <0.001). To isolate the group or groups that differ from the others use a multiple comparison procedure.
20160706b - 2590s	10Hz	14.6837
20160506a - 6347s	50Hz				Power of performed test with alpha = 0.050: 1.000
20160506b - 3690s	50Hz
20160510a - 5200s	50Hz	3.8432			Expected Mean Squares:
20160510b - 4120s	50Hz				Approximate DF Residual = 25.000
20160511a - 2930s	50Hz	3.8136			Expected MS(Subj) = var(res) + 3.273 var(Subj)
20160511b - 2880s	50Hz	4.6837			Expected MS(Treatment) = var(res) + var(Treatment)
20160513a - 3740s	50Hz	5.9743			Expected MS(Residual) = var(res)
20160513b - 3480s	50Hz	4.0887
20160623a - 4070s	50Hz	2.9035
20160623b - 2200s	50Hz	4.7865			All Pairwise Multiple Comparison Procedures (Holm-Sidak method):
20160706a - 2800s	50Hz	1.7735			Overall significance level = 0.05
20160706b - 2590s	50Hz	6.9174
20160506a - 6347s	5Hz	17.0052			Comparisons for factor: Stim frequency
20160506b - 3690s	5Hz				Comparison	Diff of Means	t	P	P<0.050
20160510a - 5200s	5Hz	16.5594			5Hz vs. 50Hz	10.722	8.027	<0.001	Yes
20160510b - 4120s	5Hz				5Hz vs. 20Hz	5.753	4.7	<0.001	Yes
20160511a - 2930s	5Hz	14.9334			5Hz vs. 10Hz	5.76	4.557	<0.001	Yes
20160511b - 2880s	5Hz	14.0763			20Hz vs. 50Hz	4.969	4.235	<0.001	Yes
20160513a - 3740s	5Hz				10Hz vs. 50Hz	4.962	4.084	<0.001	Yes
20160513b - 3480s	5Hz				20Hz vs. 10Hz	0.00771	0.00706	0.994	No
20160623a - 4070s	5Hz	11.0467
20160623b - 2200s	5Hz	13.5303
20160706a - 2800s	5Hz	19.3868
20160706b - 2590s	5Hz	15.4637
Subject	Stim period	Stim frequency	pulse pressure		pulse pressure 5Hz
20160506a	Before	5Hz	14.6491		Friedman Repeated Measures Analysis of Variance on Ranks
20160510a	Before	5Hz	8.6861
20160511a	Before	5Hz	5.955		Dependent Variable: pulse pressure
20160511b	Before	5Hz	4.3884
20160513a	Before	5Hz	10.0939		Normality Test (Shapiro-Wilk)	Failed	(P < 0.050)
20160623a	Before	5Hz	14.8768		Group	N	Missing	Median	0.25	0.75
20160623b	Before	5Hz	12.2787		Before	9	0	8.686	5.172	13.464
20160706a	Before	5Hz	6.107		Peak inc during	9	0	6.514	3.797	12.259
20160706b	Before	5Hz	3.3794		End during	9	0	11.017	7.761	16.12
20160506a	Peak inc during	5Hz	13.2897		After	9	0	8.285	5.191	13.52
20160510a	Peak inc during	5Hz	6.5137
					Chi-square= 17.667 with 3 degrees of freedom. (P = <0.001)
20160511a	Peak inc during	5Hz	4.0791
20160511b	Peak inc during	5Hz	3.5148		The differences in the median values among the treatment groups are greater than would be expected by chance; there is a statistically significant difference (P = <0.001)
20160513a	Peak inc during	5Hz	9.349
					To isolate the group or groups that differ from the others use a multiple comparison procedure.
20160623a	Peak inc during	5Hz	11.5913
20160623b	Peak inc during	5Hz	12.9273
20160706a	Peak inc during	5Hz	5.7324		All Pairwise Multiple Comparison Procedures (Tukey Test):
20160706b	Peak inc during	5Hz	2.3797
20160506a	End during	5Hz	14.1929		Comparison	Diff of Ranks	q	P<0.05
					End during vs Peak inc during	23	5.939	Yes
20160510a	End during	5Hz	11.0169		End during vs Before	12	3.098	No
					End during vs After	11	2.84	Do Not Test
20160511a	End during	5Hz	8.7893		After vs Peak inc during	12	3.098	No
20160511b	End during	5Hz	8.6318		After vs Before	1	0.258	Do Not Test
20160513a	End during	5Hz	11.5234		Before vs Peak inc during	11	2.84	Do Not Test
20160623a	End during	5Hz	18.0473
20160623b	End during	5Hz	20.0772		Note: The multiple comparisons on ranks do not include an adjustment for ties.
20160706a	End during	5Hz	6.8903
20160706b	End during	5Hz	4.0109		A result of "Do Not Test" occurs for a comparison when no significant difference is found between the two rank sums that enclose that comparison. For example, if you had four rank sums sorted in order, and found no significant difference between rank sums 4 vs. 2, then you would not test 4 vs. 3 and 3 vs. 2, but still test 4 vs. 1 and 3 vs. 1 (4 vs. 3 and 3 vs. 2 are enclosed by 4 vs. 2: 4 3 2 1)…
20160506a	After	5Hz	14.9522
20160510a	After	5Hz	8.2849
20160511a	After	5Hz	5.9003
20160511b	After	5Hz	4.4821
20160513a	After	5Hz	9.8325
20160623a	After	5Hz	15.4677
20160623b	After	5Hz	12.0877
20160706a	After	5Hz	6.2922
20160706b	After	5Hz	3.8663
Subject	Stim period	Stim frequency	pulse pressure		pulse pressure 10Hz
20160506a	Before	10Hz	12.8702		Friedman Repeated Measures Analysis of Variance on Ranks
20160506b	Before	10Hz	8.8793
20160510a	Before	10Hz	9.1011
20160511a	Before	10Hz	5.2526		Dependent Variable: pulse pressure
20160511b	Before	10Hz	3.9907
20160513a	Before	10Hz	10.3165		Normality Test (Shapiro-Wilk)	Failed	(P < 0.050)
20160513b	Before	10Hz	7.6229
20160623a	Before	10Hz	15.4466		Group	N	Missing	Median	0.25	0.75
20160623b	Before	10Hz	12.8689		Before	11	0	8.879	5.253	12.869
20160706a	Before	10Hz	5.737		Peak inc during	11	0	5.374	3.256	9.736
20160706b	Before	10Hz	4.7031		End during	11	0	12.13	7.424	19.321
20160506a	Peak inc during	10Hz	9.0736		After	11	0	8.655	5.646	12.416
20160506b	Peak inc during	10Hz	3.0318
20160510a	Peak inc during	10Hz	5.3605
					Chi-square= 29.945 with 3 degrees of freedom. (P = <0.001)
20160511a	Peak inc during	10Hz	3.2565
20160511b	Peak inc during	10Hz	3.3817		The differences in the median values among the treatment groups are greater than would be expected by chance; there is a statistically significant difference (P = <0.001)
20160513a	Peak inc during	10Hz	9.7356
20160513b	Peak inc during	10Hz	5.9828		To isolate the group or groups that differ from the others use a multiple comparison procedure.
20160623a	Peak inc during	10Hz	14.1874
20160623b	Peak inc during	10Hz	11.7955
20160706a	Peak inc during	10Hz	5.3743		All Pairwise Multiple Comparison Procedures (Tukey Test):
20160706b	Peak inc during	10Hz	2.3909
20160506a	End during	10Hz	14.0284		Comparison	Diff of Ranks	q	P<0.05
20160506b	End during	10Hz	28.4383		End during vs Peak inc during	33	7.707	Yes
20160510a	End during	10Hz	12.1303		End during vs Before	18	4.204	Yes
					End during vs After	15	3.503	No
20160511a	End during	10Hz	10.15		After vs Peak inc during	18	4.204	Yes
20160511b	End during	10Hz	7.4244		After vs Before	3	0.701	No
20160513a	End during	10Hz	16.364		Before vs Peak inc during	15	3.503	No
20160513b	End during	10Hz	9.6449
20160623a	End during	10Hz	20.0778
20160623b	End during	10Hz	19.3209		Note: The multiple comparisons on ranks do not include an adjustment for ties.
20160706a	End during	10Hz	6.6474
20160706b	End during	10Hz	6.5211
20160506a	After	10Hz	12.4163
20160506b	After	10Hz	8.6555
20160510a	After	10Hz	9.1558
20160511a	After	10Hz	5.6455
20160511b	After	10Hz	4.0985
20160513a	After	10Hz	10.3478
20160513b	After	10Hz	7.3878
20160623a	After	10Hz	15.6774
20160623b	After	10Hz	12.5615
20160706a	After	10Hz	5.8927
20160706b	After	10Hz	4.7054
Subject	Stim period	Stim frequency	pulse pressure		pulse pressure 20Hz
20160506a	Before	20Hz	13.8521		Friedman Repeated Measures Analysis of Variance on Ranks
20160506b	Before	20Hz	11.2416
20160510a	Before	20Hz	8.1521
20160510b	Before	20Hz	5.1262
20160511a	Before	20Hz	4.6655		Dependent Variable: pulse pressure
20160511b	Before	20Hz	3.4094
20160513a	Before	20Hz	10.1655		Normality Test (Shapiro-Wilk)	Passed	(P = 0.063)
20160513b	Before	20Hz	7.9774
20160623a	Before	20Hz	15.4773		Equal Variance Test:	Failed	(P < 0.050)
20160623b	Before	20Hz	13.9053
20160706a	Before	20Hz	4.9703		Group	N	Missing	Median	0.25	0.75
20160706b	Before	20Hz	4.6497		Before	12	0	8.065	4.742	13.199
20160506a	Peak inc during	20Hz	9.8397		Peak inc during	12	0	4.684	2.445	9.46
20160506b	Peak inc during	20Hz	4.4377		End during	12	0	11.371	9.463	18.103
20160510a	Peak inc during	20Hz	5.2448		After	12	0	8.272	5.266	12.554
20160510b	Peak inc during	20Hz	2.0513
20160511a	Peak inc during	20Hz	2.8185
20160511b	Peak inc during	20Hz	1.2461		Chi-square= 34.000 with 3 degrees of freedom. (P = <0.001)
20160513a	Peak inc during	20Hz	8.3219
20160513b	Peak inc during	20Hz	4.853		The differences in the median values among the treatment groups are greater than would be expected by chance; there is a statistically significant difference (P = <0.001)
20160623a	Peak inc during	20Hz	13.9775
20160623b	Peak inc during	20Hz	11.9423		To isolate the group or groups that differ from the others use a multiple comparison procedure.
20160706a	Peak inc during	20Hz	4.516
20160706b	Peak inc during	20Hz	2.3202
20160506a	End during	20Hz	18.3659		All Pairwise Multiple Comparison Procedures (Tukey Test):
20160506b	End during	20Hz	17.3137
20160510a	End during	20Hz	9.8188		Comparison	Diff of Ranks	q	P<0.05
20160510b	End during	20Hz	12.3392		End during vs Peak inc during	36	8.05	Yes
20160511a	End during	20Hz	7.9289		End during vs Before	22	4.919	Yes
20160511b	End during	20Hz	10.4028		End during vs After	14	3.13	No
20160513a	End during	20Hz	15.9777		After vs Peak inc during	22	4.919	Yes
20160513b	End during	20Hz	10.2783		After vs Before	8	1.789	No
20160623a	End during	20Hz	20.7568		Before vs Peak inc during	14	3.13	No
20160623b	End during	20Hz	19.3067
20160706a	End during	20Hz	9.3443
20160706b	End during	20Hz	5.7163		Note: The multiple comparisons on ranks do not include an adjustment for ties.
20160506a	After	20Hz	14.3755
20160506b	After	20Hz	11.398
20160510a	After	20Hz	8.7714
20160510b	After	20Hz	5.3536
20160511a	After	20Hz	5.2366
20160511b	After	20Hz	3.729
20160513a	After	20Hz	10.2512
20160513b	After	20Hz	7.772
20160623a	After	20Hz	15.4877
20160623b	After	20Hz	12.9393
20160706a	After	20Hz	5.3743
20160706b	After	20Hz	4.7328
Subject	Stim period	Stim frequency	pulse pressure		pulse pressure 50Hz
					Friedman Repeated Measures Analysis of Variance on Ranks
20160510a	Before	50Hz	8.9008
20160511a	Before	50Hz	5.5035		Dependent Variable: pulse pressure
20160511b	Before	50Hz	4.0921
20160513a	Before	50Hz	10.2709		Normality Test (Shapiro-Wilk)	Failed	(P < 0.050)
20160513b	Before	50Hz	7.4396
20160623a	Before	50Hz	14.9959		Group	N	Missing	Median	0.25	0.75
20160623b	Before	50Hz	12.6135		Before	9	0	7.44	4.798	11.442
20160706a	Before	50Hz	6.0107		Peak inc during	9	0	6.495	4.103	9.824
20160706b	Before	50Hz	3.8328		End during	9	0	8.883	6.187	15.006
					After	9	0	7.504	4.777	11.268
20160510a	Peak inc during	50Hz	8.2118
					Chi-square= 24.333 with 3 degrees of freedom. (P = <0.001)
20160511a	Peak inc during	50Hz	4.7476
20160511b	Peak inc during	50Hz	3.4589		The differences in the median values among the treatment groups are greater than would be expected by chance; there is a statistically significant difference (P = <0.001)
20160513a	Peak inc during	50Hz	9.3895
20160513b	Peak inc during	50Hz	6.4953		To isolate the group or groups that differ from the others use a multiple comparison procedure.
20160623a	Peak inc during	50Hz	10.2594
20160623b	Peak inc during	50Hz	11.9016
20160706a	Peak inc during	50Hz	5.8627		All Pairwise Multiple Comparison Procedures (Tukey Test):
20160706b	Peak inc during	50Hz	3.2208
					Comparison	Diff of Ranks	q	P<0.05
					End during vs Peak inc during	27	6.971	Yes
20160510a	End during	50Hz	8.9637		End during vs After	14	3.615	No
					End during vs Before	13	3.357	Do Not Test
20160511a	End during	50Hz	8.8834		Before vs Peak inc during	14	3.615	No
20160511b	End during	50Hz	5.0913		Before vs After	1	0.258	Do Not Test
20160513a	End during	50Hz	11.3005		After vs Peak inc during	13	3.357	Do Not Test
20160513b	End during	50Hz	8.6175
20160623a	End during	50Hz	18.712
20160623b	End during	50Hz	19.8682		Note: The multiple comparisons on ranks do not include an adjustment for ties.
20160706a	End during	50Hz	7.2828
20160706b	End during	50Hz	4.7375		A result of "Do Not Test" occurs for a comparison when no significant difference is found between the two rank sums that enclose that comparison. For example, if you had four rank sums sorted in order, and found no significant difference between rank sums 4 vs. 2, then you would not test 4 vs. 3 and 3 vs. 2, but still test 4 vs. 1 and 3 vs. 1 (4 vs. 3 and 3 vs. 2 are enclosed by 4 vs. 2: 4 3 2 1)…
20160510a	After	50Hz	8.3628
20160511a	After	50Hz	5.6742
20160511b	After	50Hz	3.8807
20160513a	After	50Hz	10.2716
20160513b	After	50Hz	7.5044
20160623a	After	50Hz	14.8963
20160623b	After	50Hz	12.2643
20160706a	After	50Hz	6.0931
20160706b	After	50Hz	3.5694

## Sheet: Fig3H and S1B
Subject	Stim period	Stim frequency	Duration PNS burst silences		Duration PNS burst silences PNA stop 1
20160506a	20Hz	PNA stop 1 (s)	0.0183		Paired t-test:
20160510a	20Hz	PNA stop 1 (s)	0.0307
20160510b	20Hz	PNA stop 1 (s)	0.0213
20160511a	20Hz	PNA stop 1 (s)	0.0239
20160511b	20Hz	PNA stop 1 (s)	0.0236		Dependent Variable: PNA stop (s)
20160513a	20Hz	PNA stop 1 (s)	0.0266
20160513b	20Hz	PNA stop 1 (s)	0.0308		Normality Test (Shapiro-Wilk)	Passed	(P = 0.319)
20160623a	20Hz	PNA stop 1 (s)	0.0216
20160623b	20Hz	PNA stop 1 (s)	0.0148		Treatment Name	N	Missing	Mean	Std Dev	SEM
20160706a	20Hz	PNA stop 1 (s)	0.0192		20Hz	11	0	0.0245	0.00679	0.00205
20160706b	20Hz	PNA stop 1 (s)	0.0386		10Hz	11	5	0.0418	0.00752	0.00307
20160506a	10Hz	PNA stop 1 (s)	0.035		Difference	11	5	-0.0185	0.0105	0.00427
20160510a	10Hz	PNA stop 1 (s)	0.0382
20160510b	10Hz	PNA stop 1 (s)			t = -4.324 with 5 degrees of freedom.
20160511a	10Hz	PNA stop 1 (s)
20160511b	10Hz	PNA stop 1 (s)	0.056		95 percent two-tailed confidence interval for difference of means: -0.0294 to -0.00749
20160513a	10Hz	PNA stop 1 (s)
20160513b	10Hz	PNA stop 1 (s)	0.0384		Two-tailed P-value = 0.00754
20160623a	10Hz	PNA stop 1 (s)	0.0392
20160623b	10Hz	PNA stop 1 (s)	0.0438		The change that occurred with the treatment is greater than would be expected by chance; there is a statistically significant change (P = 0.008)
20160706a	10Hz	PNA stop 1 (s)
20160706b	10Hz	PNA stop 1 (s)			One-tailed P-value = 0.00377
					The sample mean of treatment 10Hz exceeds the sample mean of treatment 20Hz by an amount that is greater than would be expected by chance, rejecting the hypothesis that the population mean of treatment 20Hz is greater than or equal to the population mean of treatment 10Hz. (P = 0.008)
					Power of performed two-tailed test with alpha = 0.050: 0.927
					Power of performed one-tailed test with alpha = 0.050: 0.978
Subject	Stim period	Stim frequency	Duration PNS burst silences		Duration PNS burst silences PNA stop 2
20160506a	20Hz	PNA stop 2 (s)	0.029		Wilcoxon Signed Rank Test
20160510a	20Hz	PNA stop 2 (s)	0.0335
20160510b	20Hz	PNA stop 2 (s)	0.0232
20160511a	20Hz	PNA stop 2 (s)	0.0201
20160511b	20Hz	PNA stop 2 (s)	0.0136		Dependent Variable: Col 9
20160513a	20Hz	PNA stop 2 (s)	0.0217
20160513b	20Hz	PNA stop 2 (s)	0.0219		Normality Test (Shapiro-Wilk)	Failed	(P < 0.050)
20160623a	20Hz	PNA stop 2 (s)	0.0247
20160623b	20Hz	PNA stop 2 (s)	0.0148		Group	N	Missing	Median	0.25	0.75
20160706a	20Hz	PNA stop 2 (s)	0.0192		20Hz	11	0	0.0219	0.0192	0.029
20160706b	20Hz	PNA stop 2 (s)	0.0355		10Hz	11	3	0.0409	0.0335	0.0495
20160506a	10Hz	PNA stop 2 (s)
20160510a	10Hz	PNA stop 2 (s)	0.0427
20160510b	10Hz	PNA stop 2 (s)			W= 36.000 T+ = 36.000 T-= -0.000
20160511a	10Hz	PNA stop 2 (s)	0.0308		Z-Statistic (based on positive ranks) = 2.521
20160511b	10Hz	PNA stop 2 (s)	0.0628		P(est.)= 0.014 P(exact)= 0.008
20160513a	10Hz	PNA stop 2 (s)	0.0487
20160513b	10Hz	PNA stop 2 (s)			The change that occurred with the treatment is greater than would be expected by chance; there is a statistically significant difference (P = 0.008).
20160623a	10Hz	PNA stop 2 (s)	0.0353
20160623b	10Hz	PNA stop 2 (s)	0.0329
20160706a	10Hz	PNA stop 2 (s)	0.0391
20160706b	10Hz	PNA stop 2 (s)	0.0497
Subject	Stim period	Stim frequency	Duration PNS burst silences		Duration PNS burst silences PNA stop 3
20160506a	20Hz	PNA stop 3 (s)	0.0252		Paired t-test:
20160510a	20Hz	PNA stop 3 (s)	0.027
20160510b	20Hz	PNA stop 3 (s)	0.0148
20160511a	20Hz	PNA stop 3 (s)	0.0176
20160511b	20Hz	PNA stop 3 (s)	0.0179		Dependent Variable: Col 14
20160513a	20Hz	PNA stop 3 (s)	0.0182
20160513b	20Hz	PNA stop 3 (s)	0.0202		Normality Test (Shapiro-Wilk)	Passed	(P = 0.456)
20160623a	20Hz	PNA stop 3 (s)	0.0103
20160623b	20Hz	PNA stop 3 (s)	0.0226		Treatment Name	N	Missing	Mean	Std Dev	SEM
20160706a	20Hz	PNA stop 3 (s)	0.0203		20Hz	11	0	0.0212	0.00764	0.0023
20160706b	20Hz	PNA stop 3 (s)	0.0396		10Hz	11	3	0.0388	0.00866	0.00306
20160506a	10Hz	PNA stop 3 (s)	0.0465		Difference	11	3	-0.0171	0.00826	0.00292
20160510a	10Hz	PNA stop 3 (s)
20160510b	10Hz	PNA stop 3 (s)			t = -5.838 with 7 degrees of freedom.
20160511a	10Hz	PNA stop 3 (s)	0.028
20160511b	10Hz	PNA stop 3 (s)			95 percent two-tailed confidence interval for difference of means: -0.0240 to -0.0101
20160513a	10Hz	PNA stop 3 (s)	0.0462
20160513b	10Hz	PNA stop 3 (s)	0.033		Two-tailed P-value = 0.000638
20160623a	10Hz	PNA stop 3 (s)	0.0382
20160623b	10Hz	PNA stop 3 (s)	0.0284		The change that occurred with the treatment is greater than would be expected by chance; there is a statistically significant change (P = <0.001)
20160706a	10Hz	PNA stop 3 (s)	0.0391
20160706b	10Hz	PNA stop 3 (s)	0.0511		One-tailed P-value = 0.000319
					The sample mean of treatment 10Hz exceeds the sample mean of treatment 20Hz by an amount that is greater than would be expected by chance, rejecting the hypothesis that the population mean of treatment 20Hz is greater than or equal to the population mean of treatment 10Hz. (P = <0.001)
					Power of performed two-tailed test with alpha = 0.050: 0.999
					Power of performed one-tailed test with alpha = 0.050: 1.000
Subject	Stim period	Stim frequency	Duration PNS burst silences		Duration PNS burst silences PNA stop 4
20160506a	20Hz	PNA stop 4 (s)	0.0191		Wilcoxon Signed Rank Test
20160510a	20Hz	PNA stop 4 (s)	0.027
20160510b	20Hz	PNA stop 4 (s)	0.0167
20160511a	20Hz	PNA stop 4 (s)	0.0226
20160511b	20Hz	PNA stop 4 (s)	0.0193		Dependent Variable: Col 19
20160513a	20Hz	PNA stop 4 (s)	0.0231
20160513b	20Hz	PNA stop 4 (s)	0.0211		Normality Test (Shapiro-Wilk)	Failed	(P < 0.050)
20160623a	20Hz	PNA stop 4 (s)	0.0144
20160623b	20Hz	PNA stop 4 (s)	0.0174		Group	N	Missing	Median	0.25	0.75
20160706a	20Hz	PNA stop 4 (s)	0.0158		20Hz	11	0	0.0193	0.0167	0.0231
20160706b	20Hz	PNA stop 4 (s)	0.0335		10Hz	11	3	0.0392	0.0325	0.0459
20160506a	10Hz	PNA stop 4 (s)	0.0408
20160510a	10Hz	PNA stop 4 (s)	0.0376
20160510b	10Hz	PNA stop 4 (s)			W= 36.000 T+ = 36.000 T-= -0.000
20160511a	10Hz	PNA stop 4 (s)			Z-Statistic (based on positive ranks) = 2.521
20160511b	10Hz	PNA stop 4 (s)	0.0709		P(est.)= 0.014 P(exact)= 0.008
20160513a	10Hz	PNA stop 4 (s)
20160513b	10Hz	PNA stop 4 (s)	0.0283		The change that occurred with the treatment is greater than would be expected by chance; there is a statistically significant difference (P = 0.008).
20160623a	10Hz	PNA stop 4 (s)	0.0344
20160623b	10Hz	PNA stop 4 (s)	0.0319
20160706a	10Hz	PNA stop 4 (s)	0.041
20160706b	10Hz	PNA stop 4 (s)	0.0475
Subject	Stim period	Stim frequency	Duration PNS burst silences		Duration PNA burst silences PNA stop 5
20160506a	20Hz	PNA stop 5 (s)	0.0237		Paired t-test:
20160510a	20Hz	PNA stop 5 (s)	0.0279
20160510b	20Hz	PNA stop 5 (s)	0.0102
20160511a	20Hz	PNA stop 5 (s)	0.0113
20160511b	20Hz	PNA stop 5 (s)	0.015		Dependent Variable: Col 24
20160513a	20Hz	PNA stop 5 (s)	0.0168
20160513b	20Hz	PNA stop 5 (s)	0.0186		Normality Test (Shapiro-Wilk)	Passed	(P = 0.789)
20160623a	20Hz	PNA stop 5 (s)	0.0154
20160623b	20Hz	PNA stop 5 (s)	0.0174		Treatment Name	N	Missing	Mean	Std Dev	SEM
20160706a	20Hz	PNA stop 5 (s)	0.0158		20Hz	11	0	0.0192	0.00842	0.00254
20160706b	20Hz	PNA stop 5 (s)	0.0396		10Hz	11	4	0.0383	0.0103	0.00389
20160506a	10Hz	PNA stop 5 (s)	0.0459		Difference	11	4	-0.0196	0.0112	0.00424
20160510a	10Hz	PNA stop 5 (s)	0.0338
20160510b	10Hz	PNA stop 5 (s)			t = -4.607 with 6 degrees of freedom.
20160511a	10Hz	PNA stop 5 (s)	0.0294
20160511b	10Hz	PNA stop 5 (s)			95 percent two-tailed confidence interval for difference of means: -0.0299 to -0.00917
20160513a	10Hz	PNA stop 5 (s)	0.0564
20160513b	10Hz	PNA stop 5 (s)	0.0316		Two-tailed P-value = 0.00366
20160623a	10Hz	PNA stop 5 (s)
20160623b	10Hz	PNA stop 5 (s)	0.0289		The change that occurred with the treatment is greater than would be expected by chance; there is a statistically significant change (P = 0.004)
20160706a	10Hz	PNA stop 5 (s)	0.0423
20160706b	10Hz	PNA stop 5 (s)			One-tailed P-value = 0.00183
					The sample mean of treatment 10Hz exceeds the sample mean of treatment 20Hz by an amount that is greater than would be expected by chance, rejecting the hypothesis that the population mean of treatment 20Hz is greater than or equal to the population mean of treatment 10Hz. (P = 0.004)
					Power of performed two-tailed test with alpha = 0.050: 0.967
					Power of performed one-tailed test with alpha = 0.050: 0.991
Duration PNA burst silences 20Hz
Subject	PNA stop 1 (s)	PNA stop 2 (s)	PNA stop 3 (s)	PNA stop 4 (s)	PNA stop 5 (s)	PNA stop 6 (s)	PNA stop 7 (s)	PNA stop 8 (s)	PNA stop 9 (s)
20160506a	0.0183	0.029	0.0252	0.0191	0.0237	0.0229	0.0168	0.0191	0.0138
20160506b	0.0287	0.0304	0.0275	0.0252	0.0178	0.0206	0.0229	0.0218	0.0373
20160510a	0.0307	0.0335	0.027	0.027	0.0279	0.0279	0.0242	0.0223	0.0242
20160510b	0.0213	0.0232	0.0148	0.0167	0.0102	0.013	0.0148	0.0176	0.0167
20160511a	0.0239	0.0201	0.0176	0.0226	0.0113	0.0081721	0.0126	0.0145	0.0145
20160511b	0.0236	0.0136	0.0179	0.0193	0.015	0.0114	0.0136	0.0136	0.0122
20160513a	0.0266	0.0217	0.0182	0.0231	0.0168	0.0154	0.0133	0.0161	0.0161
20160513b	0.0308	0.0219	0.0202	0.0211	0.0186	0.0154	0.0162	0.0154	0.0162
20160623a	0.0216	0.0247	0.0103	0.0144	0.0154	0.0175	0.0237	0.0206	0.0134
20160623b	0.0148	0.0148	0.0226	0.0174	0.0174	0.0156	0.0113	0.0182	0.0104
20160706a	0.0192	0.0192	0.0203	0.0158	0.0158	0.0225	0.0192	0.0214	0.0214
20160706b	0.0386	0.0355	0.0396	0.0335	0.0396	0.0345	0.0355	0.0335	0.0355
					Duration PNA burst silences 20Hz
					One Way Repeated Measures Analysis of Variance
					Normality Test (Shapiro-Wilk)	Passed	(P = 0.151)
					Equal Variance Test:	Passed	(P = 0.897)
					Treatment Name	N	Missing	Mean	Std Dev	SEM
					PNA stop 1 (s)	12	0	0.0248	0.00659	0.0019
					PNA stop 2 (s)	12	0	0.024	0.00696	0.00201
					PNA stop 3 (s)	12	0	0.0218	0.00751	0.00217
					PNA stop 4 (s)	12	0	0.0213	0.00544	0.00157
					PNA stop 5 (s)	12	0	0.0191	0.00803	0.00232
					PNA stop 6 (s)	12	0	0.0188	0.00739	0.00213
					PNA stop 7 (s)	12	0	0.0187	0.00694	0.002
					PNA stop 8 (s)	12	0	0.0195	0.0053	0.00153
					PNA stop 9 (s)	12	0	0.0193	0.00885	0.00255
					Source of Variation	DF	SS	MS	F	P
					Between Subjects	11	0.00371	0.000338
					Between Treatments	8	0.000514	6.43e-05	4.514	<0.001
					Residual	88	0.00125	1.42e-05
					Total	107	0.00548
					The differences in the mean values among the treatment groups are greater than would be expected by chance; there is a statistically significant difference (P = <0.001). To isolate the group or groups that differ from the others use a multiple comparison procedure.
					Power of performed test with alpha = 0.050: 0.977
					All Pairwise Multiple Comparison Procedures (Holm-Sidak method):
					Overall significance level = 0.05
					Comparisons for factor:
					Comparison	Diff of Means	t	P	P<0.050
					PNA stop 1 ( vs. PNA stop 7 (	0.00616	3.999	0.005	Yes
					PNA stop 1 ( vs. PNA stop 6 (	0.00608	3.947	0.006	Yes
					PNA stop 1 ( vs. PNA stop 5 (	0.00571	3.705	0.012	Yes
					PNA stop 1 ( vs. PNA stop 9 (	0.00554	3.594	0.018	Yes
					PNA stop 1 ( vs. PNA stop 8 (	0.00532	3.457	0.027	Yes
					PNA stop 2 ( vs. PNA stop 7 (	0.00529	3.432	0.028	Yes
					PNA stop 2 ( vs. PNA stop 6 (	0.00521	3.38	0.032	Yes
					PNA stop 2 ( vs. PNA stop 5 (	0.00483	3.139	0.065	No
					PNA stop 2 ( vs. PNA stop 9 (	0.00466	3.028	0.087	No
					PNA stop 2 ( vs. PNA stop 8 (	0.00445	2.89	0.123	No
					PNA stop 1 ( vs. PNA stop 4 (	0.00357	2.318	0.45	No
					PNA stop 3 ( vs. PNA stop 7 (	0.0031	2.009	0.704	No
					PNA stop 1 ( vs. PNA stop 3 (	0.00306	1.989	0.706	No
					PNA stop 3 ( vs. PNA stop 6 (	0.00301	1.957	0.717	No
					PNA stop 2 ( vs. PNA stop 4 (	0.0027	1.752	0.852	No
					PNA stop 3 ( vs. PNA stop 5 (	0.00264	1.716	0.861	No
					PNA stop 4 ( vs. PNA stop 7 (	0.00259	1.68	0.868	No
					PNA stop 4 ( vs. PNA stop 6 (	0.00251	1.628	0.884	No
					PNA stop 3 ( vs. PNA stop 9 (	0.00247	1.605	0.882	No
					PNA stop 3 ( vs. PNA stop 8 (	0.00226	1.467	0.931	No
					PNA stop 2 ( vs. PNA stop 3 (	0.00219	1.423	0.937	No
					PNA stop 4 ( vs. PNA stop 5 (	0.00214	1.387	0.938	No
					PNA stop 4 ( vs. PNA stop 9 (	0.00197	1.276	0.96	No
					PNA stop 4 ( vs. PNA stop 8 (	0.00175	1.138	0.979	No
					PNA stop 1 ( vs. PNA stop 2 (	0.000873	0.567	1	No
					PNA stop 8 ( vs. PNA stop 7 (	0.000835	0.542	1	No
					PNA stop 8 ( vs. PNA stop 6 (	0.000755	0.49	1	No
					PNA stop 9 ( vs. PNA stop 7 (	0.000623	0.404	1	No
					PNA stop 9 ( vs. PNA stop 6 (	0.000543	0.352	1	No
					PNA stop 3 ( vs. PNA stop 4 (	0.000507	0.329	1	No
					PNA stop 5 ( vs. PNA stop 7 (	0.000452	0.294	1	No
					PNA stop 8 ( vs. PNA stop 5 (	0.000383	0.248	1	No
					PNA stop 5 ( vs. PNA stop 6 (	0.000372	0.242	0.999	No
					PNA stop 8 ( vs. PNA stop 9 (	0.000212	0.138	0.999	No
					PNA stop 9 ( vs. PNA stop 5 (	0.000171	0.111	0.992	No
					PNA stop 6 ( vs. PNA stop 7 (	8.01e-05	0.052	0.959	No

## Sheet: FigS1G
Duration apnea (s)	Stim frequency	VNA increase duration (s)		Linear regression analysis duration apnea vs VNA increase duration			Correlation analysis duration apnea vs VNA increase duration
4.85265		50		Best-fit values ± SE	Perfect line		Pearson r	Horizontal line
27.1898		50		Slope	0		r
27.3789		50		Y-intercept	50		95% confidence interval
15.7071		50		X-intercept			R squared
12.6484		50		1/slope
21.7116		50					P value
9.84754		50		95% Confidence Intervals			P (two-tailed)
15.3978		50		Slope			P value summary
16.5334		50		Y-intercept			Significant? (alpha = 0.05)
16.48		50		X-intercept
13.7606		50					Number of XY Pairs	12
12.8875		50		Goodness of Fit
				R square	1
				Sy.x	0
				Is slope significantly non-zero?
				F
				DFn, DFd
				P value
				Deviation from zero?
				Equation	Y = 0*X + 50
				Data
				Number of X values	12
				Maximum number of Y replicates	1
				Total number of values	12
				Number of missing values	0
HR decrease duration (s)	Stim frequency	VNA increase duration (s)		Linear regression analysis HR decrease duration vs VNA increase duration			Correlation analysis HR decrease duration vs VNA increase duration
51.9711	10Hz	50		Best-fit values ± SE	Vertical line		Pearson r	Vertical line
51.9856	10Hz	50		Slope			r
53.0661	10Hz	50		Y-intercept			95% confidence interval
52.3919	10Hz	50		X-intercept			R squared
53.1646	10Hz	50		1/slope
46.2385	20Hz	50					P value
50.8044	20Hz	50		95% Confidence Intervals			P (two-tailed)
41.0363	20Hz	50		Slope			P value summary
52.5291	20Hz	50		Y-intercept			Significant? (alpha = 0.05)
52.7395	20Hz	50		X-intercept
42.0331	20Hz	50					Number of XY Pairs	12
52.9925	20Hz	50		Goodness of Fit
				R square
				Sy.x
				Is slope significantly non-zero?
				F
				DFn, DFd
				P value
				Deviation from zero?
				Equation
				Data
				Number of X values	12
				Maximum number of Y replicates	1
				Total number of values	12
				Number of missing values	0
Duration apnea (s)	Stim frequency	SNA decrease duration (s)		Linear regression analysis duration apnea vs SNA decrease duration			Correlation analysis duration apnea vs SNA decrease duration
4.85265	10Hz	4.4718		Best-fit values ± SE			Pearson r
15.7071	10Hz	14.4315		Slope	0.4037 ± 0.122		r	0.6496
12.6484	10Hz	10.7826		Y-intercept	4.221 ± 1.825		95% confidence interval	0.2457 to 0.8613
10.8015	10Hz	5.26485		X-intercept	-10.46		R squared	0.422
6.75155	10Hz	6.51919		1/slope	2.477
14.567	20Hz	13.8943					P value
21.7116	20Hz	14.9663		95% Confidence Intervals			P (two-tailed)	0.0048
9.84754	20Hz	7.46644		Slope	0.1437 to 0.6637		P value summary	**
15.3978	20Hz	12.3036		Y-intercept	0.3318 to 8.111		Significant? (alpha = 0.05)	Yes
16.5334	20Hz	11.3783		X-intercept	-55.34 to -0.5099
16.48	20Hz	7.38816					Number of XY Pairs	17
13.7606	20Hz	9.82724		Goodness of Fit
12.8875	20Hz	11.0774		R square	0.422
22.3206	20Hz	10.2771		Sy.x	2.387
13.6029	20Hz	9.22014
21.9438	20Hz	10.3653		Is slope significantly non-zero?
11.3731	20Hz	9.4989		F	10.95
				DFn, DFd	1, 15
				P value	0.0048
				Deviation from zero?	Significant
				Equation	Y = 0.4037*X + 4.221
				Data
				Number of X values	17
				Maximum number of Y replicates	1
				Total number of values	17
				Number of missing values	0
PP decrease duration (s)	Stim frequency	SNA decrease duration (s)		Linear regression analysis PP decrease duration vs SNA decrease duration			Correlation analysis PP decrease duration vs SNA decrease duration
11.4808	10Hz	4.4718		Best-fit values ± SE			Pearson r
9.60532	10Hz	5.47966		Slope	0.4808 ± 0.1427		r	0.6219
17.4114	10Hz	14.4315		Y-intercept	8.027 ± 1.455		95% confidence interval	0.2475 to 0.8347
14.2109	10Hz	10.7826		X-intercept	-16.69		R squared	0.3868
16.1613	10Hz	8.2691		1/slope	2.08
8.69874	10Hz	5.26485					P value
13.5594	10Hz	12.2443		95% Confidence Intervals			P (two-tailed)	0.0034
14.6837	10Hz	6.51919		Slope	0.181 to 0.7806		P value summary	**
14.263	20Hz	13.8943		Y-intercept	4.971 to 11.08		Significant? (alpha = 0.05)	Yes
15.2543	20Hz	14.9663		X-intercept	-60.6 to -6.433
10.7473	20Hz	7.46644					Number of XY Pairs	20
12.9197	20Hz	12.3036		Goodness of Fit
12.1486	20Hz	11.3783		R square	0.3868
10.4496	20Hz	7.38816		Sy.x	1.889
10.9532	20Hz	9.82724
13.1796	20Hz	11.0774		Is slope significantly non-zero?
11.7347	20Hz	10.2771		F	11.35
10.4006	20Hz	9.22014		DFn, DFd	1, 18
15.2778	20Hz	10.3653		P value	0.0034
11.23	20Hz	9.4989		Deviation from zero?	Significant
				Equation	Y = 0.4808*X + 8.027
				Data
				Number of X values	20
				Maximum number of Y replicates	1
				Total number of values	20
				Number of missing values	0
