# Supplementary material for: PreBötzinger complex neurons drive respiratory modulation of blood pressure and heart rate
Source: eLife. 2020 Jun 15;9:e57288. doi: 10.7554/eLife.57288 (PMC7326498; doi:10.7554/eLife.57288)
Supplement: Figure 4—source data 1. [file elife-57288-fig4-data1.xlsx]

## Sheet: Fig 4B
HR before atropine	HR after atropine		HR before vs after atropine
349.91	381.618		Paired t-test:
399.956	403.694
381.174	388.182
265.882	289.587
334.221	352.758		Normality Test (Shapiro-Wilk)	Passed	(P = 0.353)
285.389	309.085
328.935	335.594		Treatment Name	N	Missing	Mean	Std Dev	SEM
			HR before atropine	7	0	335.067	48.044	18.159
			HR during atropine	7	0	351.503	42.551	16.083
			Difference	7	0	-16.436	10.715	4.05
			t = -4.058 with 6 degrees of freedom.
			95 percent two-tailed confidence interval for difference of means: -26.346 to -6.526
			Two-tailed P-value = 0.00666
			The change that occurred with the treatment is greater than would be expected by chance; there is a statistically significant change (P = 0.007)
			One-tailed P-value = 0.00333
			The sample mean of treatment HR during atropine exceeds the sample mean of treatment HR before atropine by an amount that is greater than would be expected by chance, rejecting the hypothesis that the population mean of treatment HR before atropine is greater than or equal to the population mean of treatment HR during atropine. (P = 0.007)
			Power of performed two-tailed test with alpha = 0.050: 0.919
			Power of performed one-tailed test with alpha = 0.050: 0.972
RSA before atropine	RSA after atropine		RSA before vs after atropine
7.62	0.2208		Wilcoxon Signed Rank Test
0.4338	0.0917
2.5019	0.2469
9.1705	0.1488
18.2506	0.5022		Normality Test (Shapiro-Wilk)	Passed	(P = 0.087)
2.0295	0.7785
2.258	0.4828		Group	N	Missing	Median	0.25	0.75
			RSA before atropine	7	0	2.502	2.029	9.171
			RSA during atropine	7	0	0.247	0.149	0.502
			W= -28.000 T+ = 0.000 T-= -28.000
			Z-Statistic (based on positive ranks) = -2.366
			P(est.)= 0.022 P(exact)= 0.016
			The change that occurred with the treatment is greater than would be expected by chance; there is a statistically significant difference (P = 0.016).

## Sheet: Fig 4D
Subjects	Stim period	Stim condition	HR
20160511b	Before	20Hz	335.446		Two Way Repeated Measures ANOVA (Two Factor Repetition)
20160513a	Before	20Hz	392.189
20160513b	Before	20Hz	372.722
20160623a	Before	20Hz	237.044
20160623b	Before	20Hz	264.83		Balanced Design
20160706a	Before	20Hz	297.045
20160706b	Before	20Hz	327.744		Dependent Variable: HR
20160511b	Peak inc during	20Hz	93.2831
20160513a	Peak inc during	20Hz	127.309		Normality Test (Shapiro-Wilk)	Passed	(P = 0.875)
20160513b	Peak inc during	20Hz	134.136
20160623a	Peak inc during	20Hz	60.9992		Equal Variance Test:	Passed	(P = 0.579)
20160623b	Peak inc during	20Hz	64.0369
20160706a	Peak inc during	20Hz	99.3635		Source of Variation	DF	SS	MS	F	P
20160706b	Peak inc during	20Hz	85.0484		Subjects	6	55114.5	9185.76
20160511b	After	20Hz	335.293		Stim period	2	125043	62521.4	371.497	<0.001
20160513a	After	20Hz	391.178		Stim period x Subjects	12	2019.55	168.296
20160513b	After	20Hz	373.178		Condition	1	104655	104655	102.494	<0.001
20160623a	After	20Hz	251.353		Condition x Subjects	6	6126.5	1021.08
20160623b	After	20Hz	304.525		Stim period x Condition	2	118195	59097.6	410.502	<0.001
20160706a	After	20Hz	307.429		Residual	12	1727.57	143.964
20160706b	After	20Hz	332.097		Total	41	412881	10070.3
20160511b	Before	Atropine 20Hz	381.618
20160513a	Before	Atropine 20Hz	390.821
20160513b	Before	Atropine 20Hz	384.63		Main effects cannot be properly interpreted if significant interaction is determined. This is because the size of a factor's effect depends upon the level of the other factor.
20160623a	Before	Atropine 20Hz	289.379
20160623b	Before	Atropine 20Hz	352.888		The effect of different levels of Stim period depends on what level of Condition is present. There is a statistically significant interaction between Stim period and Condition. (P = <0.001)
20160706a	Before	Atropine 20Hz	304.478
20160706b	Before	Atropine 20Hz	335.284		Power of performed test with alpha = 0.0500: for Stim period : 1.000
20160511b	Peak inc during	Atropine 20Hz	382		Power of performed test with alpha = 0.0500: for Condition : 1.000
20160513a	Peak inc during	Atropine 20Hz	381.05		Power of performed test with alpha = 0.0500: for Stim period x Condition : 1.000
20160513b	Peak inc during	Atropine 20Hz	379.907
20160623a	Peak inc during	Atropine 20Hz	285.079		Least square means for Stim period :
20160623b	Peak inc during	Atropine 20Hz	350.726		Group	Mean
20160706a	Peak inc during	Atropine 20Hz	304.171		Before	333.294
20160706b	Peak inc during	Atropine 20Hz	329.49		Peak inc during	219.757
20160511b	After	Atropine 20Hz	383.901		After	337.595
20160513a	After	Atropine 20Hz	383.66		Std Err of LS Mean = 3.467
20160513b	After	Atropine 20Hz	381.989
20160623a	After	Atropine 20Hz	288.659		Least square means for Condition :
20160623b	After	Atropine 20Hz	353.342		Group	Mean
20160706a	After	Atropine 20Hz	305.293		20Hz	246.964
20160706b	After	Atropine 20Hz	334.429		Atropine 20Hz	346.8
					Std Err of LS Mean = 6.973
					Least square means for Stim period x Condition :
					Group	Mean
					Before x 20Hz	318.146
					Before x Atropine 20Hz	348.443
					Peak inc during x 20Hz	94.882
					Peak inc duri x Atropine 20Hz	344.632
					After x 20Hz	327.865
					After x Atropine 20Hz	347.325
					Std Err of LS Mean = 4.535
					All Pairwise Multiple Comparison Procedures (Holm-Sidak method):
					Overall significance level = 0.05
					Comparisons for factor: Stim period
					Comparison	Diff of Means	t	P	P<0.050
					After vs. Peak inc during	117.838	24.032	<0.001	Yes
					Before vs. Peak inc during	113.537	23.155	<0.001	Yes
					After vs. Before	4.301	0.877	0.398	No
					Comparisons for factor: Condition
					Comparison	Diff of Means	t	P	P<0.050
					Atropine 20Hz vs. 20Hz	99.836	10.124	<0.001	Yes
					Comparisons for factor: Condition within Before
					Comparison	Diff of Means	t	P	P<0.05
					Atropine 20Hz vs. 20Hz	30.297	2.713	0.023	Yes
					Comparisons for factor: Condition within Peak inc during
					Comparison	Diff of Means	t	P	P<0.05
					Atropine 20Hz vs. 20Hz	249.75	22.368	<0.001	Yes
					Comparisons for factor: Condition within After
					Comparison	Diff of Means	t	P	P<0.05
					Atropine 20Hz vs. 20Hz	19.46	1.743	0.114	No
					Comparisons for factor: Stim period within 20Hz
					Comparison	Diff of Means	t	P	P<0.05
					After vs. Peak inc during	232.982	34.883	<0.001	Yes
					Before vs. Peak inc during	223.263	33.428	<0.001	Yes
					After vs. Before	9.719	1.455	0.159	No
					Comparisons for factor: Stim period within Atropine 20Hz
					Comparison	Diff of Means	t	P	P<0.05
					Before vs. Peak inc during	3.811	0.571	0.922	No
					After vs. Peak inc during	2.693	0.403	0.904	No
					Before vs. After	1.118	0.167	0.868	No
