# Supplementary material for: PreBötzinger complex neurons drive respiratory modulation of blood pressure and heart rate
Source: eLife. 2020 Jun 15;9:e57288. doi: 10.7554/eLife.57288 (PMC7326498; doi:10.7554/eLife.57288)
Supplement: Figure 5—source data 1. [file elife-57288-fig5-data1.xlsx]

## Sheet: Fig 5C and S1
Subjects	Peak	Delta change amplitude	Time to peak		Delta change amplitude							Time to peak
20160506a	SNA #1	3.1831	0.0537		One Way Repeated Measures Analysis of Variance							One Way Repeated Measures Analysis of Variance
20160510a	SNA #1	0
20160510b	SNA #1	0
20160511a	SNA #1	2.2687	0.0649
20160511b	SNA #1	0.483	0.0582		Dependent Variable: Delta change amplitude							Dependent Variable: timing to peak
20160513a	SNA #1	3.4997	0.081
20160513b	SNA #1	0			Normality Test (Shapiro-Wilk)	Passed	(P = 0.609)					Normality Test (Shapiro-Wilk)	Passed	(P = 0.255)
20160623a	SNA #1	0.9753	0.067
20160623b	SNA #1	2.7905	0.0612		Equal Variance Test:	Passed	(P = 0.871)					Equal Variance Test:	Passed	(P = 0.528)
20160706a	SNA #1	0.4426	0.0673
20160706b	SNA #1	0.281	0.065		Treatment Name	N	Missing	Mean	Std Dev	SEM		Treatment Name	N	Missing	Mean	Std Dev	SEM
20160506a	SNA #2	-5.161	0.115		SNA #1	11	0	1.266	1.384	0.417		SNA #1	11	3	0.0648	0.00805	0.00285
20160510a	SNA #2	-4.9797	0.1125		SNA #2	11	0	-2.539	1.843	0.556		SNA #2	11	0	0.134	0.0407	0.0123
20160510b	SNA #2	-1.9759	0.1082		VNA #1	11	5	4.182	2.919	1.192		VNA #1	11	5	0.00722	0.000163	6.64e-05
20160511a	SNA #2	-0.7987	0.1168		VNA #2	11	6	1.047	0.708	0.317		VNA #2	11	6	0.0329	0.00843	0.00377
20160511b	SNA #2	-0.8697	0.1236
20160513a	SNA #2	-2.3187	0.1144		Source of Variation	DF	SS	MS	F	P		Source of Variation	DF	SS	MS	F	P
20160513b	SNA #2	-3.1768	0.1009		Between Subjects	10	44.084	4.408				Between Subjects	10	0.0094	0.00094
20160623a	SNA #2	-5.383	0.229		Between Treatments	3	164.044	54.681	19.371	<0.001		Between Treatments	3	0.0562	0.0187	37.763	<0.001
20160623b	SNA #2	-1.3414	0.1981		Residual	19	53.635	2.823				Residual	16	0.00794	0.000496
20160706a	SNA #2	-1.1581	0.1243		Total	32	288.632	9.02				Total	29	0.0934	0.00322
20160706b	SNA #2	-0.771	0.1357
20160506a	VNA #1	3.7841	0.0075297		The differences in the mean values among the treatment groups are greater than would be expected by chance; there is a statistically significant difference (P = <0.001). To isolate the group or groups that differ from the others use a multiple comparison procedure.							The differences in the mean values among the treatment groups are greater than would be expected by chance; there is a statistically significant difference (P = <0.001). To isolate the group or groups that differ from the others use a multiple comparison procedure.
20160510a	VNA #1
20160510b	VNA #1	1.1962	0.0072271		Power of performed test with alpha = 0.050: 1.000							Power of performed test with alpha = 0.050: 1.000
20160511a	VNA #1	9.736	0.0070988
20160511b	VNA #1	2.6422	0.0071274		Expected Mean Squares:							Expected Mean Squares:
20160513a	VNA #1	3.6426	0.0072096		Approximate DF Residual = 19.000							Approximate DF Residual = 16.000
20160513b	VNA #1	4.0919	0.0071055		Expected MS(Subj) = var(res) + 2.900 var(Subj)							Expected MS(Subj) = var(res) + 2.600 var(Subj)
20160623a	VNA #1				Expected MS(Treatment) = var(res) + var(Treatment)							Expected MS(Treatment) = var(res) + var(Treatment)
20160623b	VNA #1				Expected MS(Residual) = var(res)							Expected MS(Residual) = var(res)
20160706a	VNA #1
20160706b	VNA #1
20160506a	VNA #2	1.8519	0.0248		All Pairwise Multiple Comparison Procedures (Holm-Sidak method):							All Pairwise Multiple Comparison Procedures (Holm-Sidak method):
20160510a	VNA #2				Overall significance level = 0.05							Overall significance level = 0.05
20160510b	VNA #2	0.1619	0.0414
20160511a	VNA #2	1.6665	0.0332		Comparisons for factor: Nerve							Comparisons for factor: Nerve
20160511b	VNA #2	0.6298	0.024		Comparison	Diff of Means	t	P	P<0.050			Comparison	Diff of Means	t	P	P<0.050
20160513a	VNA #2	0.9228	0.041		VNA #1 vs. SNA #2	6.49	7.107	<0.001	Yes			SNA #2 vs. VNA #1	0.116	9.435	<0.001	Yes
20160513b	VNA #2				SNA #1 vs. SNA #2	3.805	5.312	<0.001	Yes			SNA #2 vs. SNA #1	0.0768	7.081	<0.001	Yes
20160623a	VNA #2				VNA #2 vs. SNA #2	3.191	3.258	0.016	Yes			SNA #2 vs. VNA #2	0.0925	7.037	<0.001	Yes
20160623b	VNA #2				VNA #1 vs. SNA #1	2.685	2.94	0.025	Yes			SNA #1 vs. VNA #1	0.0391	2.932	0.029	Yes
20160706a	VNA #2				VNA #1 vs. VNA #2	3.299	2.916	0.018	Yes			VNA #2 vs. VNA #1	0.0234	1.534	0.268	No
20160706b	VNA #2				SNA #1 vs. VNA #2	0.614	0.627	0.538	No			SNA #1 vs. VNA #2	0.0157	1.11	0.283	No
Subjects	Peak	Absolute AUC			Absolute AUC
20160506a	SNA #1	60.1762			One Way Repeated Measures Analysis of Variance
20160510a	SNA #1	0
20160510b	SNA #1	0
20160511a	SNA #1	40.3535
20160511b	SNA #1	6.5201			Dependent Variable: Absolute AUC
20160513a	SNA #1	57.262
20160513b	SNA #1	0			Normality Test (Shapiro-Wilk)	Passed	(P = 0.691)
20160623a	SNA #1	17.757
20160623b	SNA #1	76.9017			Equal Variance Test:	Passed	(P = 0.708)
20160706a	SNA #1	6.0538
20160706b	SNA #1	4.9759			Treatment Name	N	Missing	Mean	Std Dev	SEM
20160506a	SNA #2	908.18			SNA #1	11	0	24.545	28.696	8.652
20160510a	SNA #2	818.462			SNA #2	11	0	338.107	298.82	90.098
20160510b	SNA #2	225.873			VNA #1	11	6	116.898	81.622	36.503
20160511a	SNA #2	61.5009
20160511b	SNA #2	131.938			Source of Variation	DF	SS	MS	F	P
20160513a	SNA #2	279.229			Between Subjects	10	356258	35625.8
20160513b	SNA #2	619.63			Between Treatments	2	552846	276423	6.771	0.009
20160623a	SNA #2	232.212			Residual	14	571560	40825.7
20160623b	SNA #2	185.819			Total	26	1.48549e+06	57134.3
20160706a	SNA #2	115.54
20160706b	SNA #2	140.791			The differences in the mean values among the treatment groups are greater than would be expected by chance; there is a statistically significant difference (P = 0.009). To isolate the group or groups that differ from the others use a multiple comparison procedure.
20160506a	VNA #1+2	90.438
20160510a	VNA #1+2				Power of performed test with alpha = 0.050: 0.788
20160510b	VNA #1+2	18.646
20160511a	VNA #1+2	242.998			Expected Mean Squares:
20160511b	VNA #1+2	102.189			Approximate DF Residual = 14.000
20160513a	VNA #1+2	130.22			Expected MS(Subj) = var(res) + 2.400 var(Subj)
20160513b	VNA #1+2				Expected MS(Treatment) = var(res) + var(Treatment)
20160623a	VNA #1+2				Expected MS(Residual) = var(res)
20160623b	VNA #1+2
20160706a	VNA #1+2
20160706b	VNA #1+2				All Pairwise Multiple Comparison Procedures (Holm-Sidak method):
					Overall significance level = 0.05
					Comparisons for factor: Groups pour AUC
					Comparison	Diff of Means	t	P	P<0.050
					SNA #2 vs. SNA #1	313.561	3.639	0.008	Yes
					SNA #2 vs. VNA #1	216.985	1.827	0.17	No
					VNA #1 vs. SNA #1	96.576	0.813	0.43	No
