# Supplementary material for: PreBötzinger complex neurons drive respiratory modulation of blood pressure and heart rate
Source: eLife. 2020 Jun 15;9:e57288. doi: 10.7554/eLife.57288 (PMC7326498; doi:10.7554/eLife.57288)
Supplement: Figure 6—source data 1. [file elife-57288-fig6-data1.xlsx]

## Sheet: Fig 6B part 1 and S1A and S1B
Subject	Stim period	Stim frequency	RespSNA duration	RespSNA amplitude	RespSNA AUC	Mean tonic SNA		RespSNA duration							RespSNA amplitude							RespSNA AUC							Mean tonic SNA
20160506a	Before	20Hz	1.3224	10.5707	2.3778	5.3827		Two Way Repeated Measures ANOVA (Two Factor Repetition)							Two Way Repeated Measures ANOVA (Two Factor Repetition)							Two Way Repeated Measures ANOVA (Two Factor Repetition)							Two Way Repeated Measures ANOVA (Two Factor Repetition)
20160506b	Before	20Hz	0.9277	10.6646	2.0653	5.1673
20160510a	Before	20Hz	1.1615	15.1506	4.8843	6.5201
20160510b	Before	20Hz	0.895	8.6973	1.2238	4.4347
20160511a	Before	20Hz	0.9742	7.8585	0.9342	4.7884		General Linear Model							General Linear Model							General Linear Model							General Linear Model
20160511b	Before	20Hz	0.8988	7.4534	0.9801	3.6893
20160513a	Before	20Hz	0.8737	11.654	1.5183	5.4111		Dependent Variable: RespSNA duration							Dependent Variable: RespSNA peak level							Dependent Variable: RespSNA AUC scaled to baseline							Dependent Variable: Mean tonic SNA outside RespSNA
20160513b	Before	20Hz	1.0245	18.6315	4.4939	6.7952
20160623a	Before	20Hz	1.3388	8.0096	2.1167	5.0991		The following subjects were deleted from the calculations because of the pattern of missing data:							The following subjects were deleted from the calculations because of the pattern of missing data:							The following subjects were deleted from the calculations because of the pattern of missing data:							The following subjects were deleted from the calculations because of the pattern of missing data:
20160623b	Before	20Hz	0.9994	10.6812	2.3508	4.5228		20160506b							20160506b							20160506b							20160506b
20160706a	Before	20Hz	1.4205	9.98	1.5797	5.6938		20160510b							20160510b							20160510b							20160510b
20160706b	Before	20Hz	1.2068	3.7197	0.5313	1.8692
20160506a	During	20Hz	1.1263	10.9001	2.0831	5.5549
20160506b	During	20Hz	1.1163	11.9156	2.1084	5.4093		Normality Test (Shapiro-Wilk)	Passed	(P = 0.694)					Normality Test (Shapiro-Wilk)	Passed	(P = 0,999)					Normality Test (Shapiro-Wilk)	Passed	(P = 0.515)					Normality Test (Shapiro-Wilk)	Passed	(P = 0.822)
20160510a	During	20Hz	1.2118	15.5768	4.2359	7.1468
20160510b	During	20Hz	0.8749	8.4761	1.6808	4.1932		Equal Variance Test:	Passed	(P = 0.863)					Equal Variance Test:	Passed	(P = 0,130)					Equal Variance Test:	Passed	(P = 0.430)					Equal Variance Test:	Passed	(P = 0.997)
20160511a	During	20Hz	1.1816	7.2593	1.0401	4.9141
20160511b	During	20Hz	0.792	6.9044	1.1584	3.5475		Source of Variation	DF	SS	MS	F	P		Source of Variation	DF	SS	MS	F	P		Source of Variation	DF	SS	MS	F	P		Source of Variation	DF	SS	MS	F	P
20160513a	During	20Hz	0.9679	12.1091	1.7915	5.5711		Subjects	9	1.722	0.191	1.871	0.151		Subjects	9	977,624	108,625	22,981	<0,001		Subjects	9	95.421	10.602	34.438	<0.001		Subjects	9	121.395	13.488	22.35	<0.001
20160513b	During	20Hz	1.0622	16.205	4.6975	6.8906		Stim period	2	0.682	0.341	3.453	0.054		Stim period	2	19,646	9,823	4,925	0,020		Stim period	2	2.236	1.118	6.502	0.007		Stim period	2	0.31	0.155	2.098	0.152
20160623a	During	20Hz	1.5902	10.4718	3.2564	4.7184		Stim period x Subjects	18	1.778	0.0988				Stim period x Subjects	18	35,898	1,994				Stim period x Subjects	18	3.096	0.172				Stim period x Subjects	18	1.332	0.074
20160623b	During	20Hz	1.1754	12.9804	2.2486	5.3092		Stim frequency	1	0.534	0.534	12.372	0.007		Stim frequency	1	13,766	13,766	3,895	0,080		Stim frequency	1	3.53	3.53	14.124	0.004		Stim frequency	1	0.0377	0.0377	0.0651	0.804
20160706a	During	20Hz	0.6788	7.6884	0.5932	4.9505		Stim frequency x Subjects	9	0.388	0.0431				Stim frequency x Subjects	9	31,812	3,535				Stim frequency x Subjects	9	2.249	0.25				Stim frequency x Subjects	9	5.208	0.579
20160706b	During	20Hz	1.0622	3.5833	0.4452	2.0008		Stim period x Stim frequency	2	0.429	0.215	5.41	0.014		Stim period x Stim frequency	2	26,553	13,276	16,547	<0,001		Stim period x Stim frequency	2	2.053	1.027	9.002	0.002		Stim period x Stim frequency	2	0.0882	0.0441	0.897	0.425
20160506a	After	20Hz	1.3124	10.6629	2.4579	5.5801		Residual	18	0.714	0.0397				Residual	18	14,442	0,802				Residual	18	2.053	0.114				Residual	18	0.885	0.0492
20160506b	After	20Hz	0.9956	11.6986	1.9285	5.2188		Total	59	6.248	0.106				Total	59	1119,742	18,979				Total	59	110.639	1.875				Total	59	129.257	2.191
20160510a	After	20Hz	1.2269	14.9941	4.9059	6.408
20160510b	After	20Hz	0.8498	8.8082	1.2095	4.5282
20160511a	After	20Hz	1.1314	7.6132	1.2529	4.4936		Main effects cannot be properly interpreted if significant interaction is determined. This is because the size of a factor's effect depends upon the level of the other factor.							Main effects cannot be properly interpreted if significant interaction is determined. This is because the size of a factor's effect depends upon the level of the other factor.							Main effects cannot be properly interpreted if significant interaction is determined. This is because the size of a factor's effect depends upon the level of the other factor.							The difference in the mean values among the different levels of Stim period is not great enough to exclude the possibility that the difference is just due to random sampling variability after allowing for the effects of differences in Stim frequency. There is not a statistically significant difference (P = 0.152).
20160511b	After	20Hz	0.9679	7.0148	0.8944	3.5543
20160513a	After	20Hz	0.8171	11.6878	1.745	5.0673		The effect of different levels of Stim period depends on what level of Stim frequency is present. There is a statistically significant interaction between Stim period and Stim frequency. (P = 0.014)							The effect of different levels of Stim period depends on what level of Stim frequency is present. There is a statistically significant interaction between Stim period and Stim frequency. (P = <0,001)							The effect of different levels of Stim period depends on what level of Stim frequency is present. There is a statistically significant interaction between Stim period and Stim frequency. (P = 0.002)							The difference in the mean values among the different levels of Stim frequency is not great enough to exclude the possibility that the difference is just due to random sampling variability after allowing for the effects of differences in Stim period. There is not a statistically significant difference (P = 0.804).
20160513b	After	20Hz	0.9805	15.7781	4.1948	6.8098
20160623a	After	20Hz	1.3953	8.2495	1.9516	4.9627		Power of performed test with alpha = 0.0500: for Stim period : 0.420							Power of performed test with alpha = 0,0500: for Stim period : 0,628							Power of performed test with alpha = 0.0500: for Stim period : 0.790							The effect of different levels of Stim period does not depend on what level of Stim frequency is present. There is not a statistically significant interaction between Stim period and Stim frequency. (P = 0.425)
20160623b	After	20Hz	1.4896	11.8282	2.667	5.2902		Power of performed test with alpha = 0.0500: for Stim frequency : 0.862							Power of performed test with alpha = 0,0500: for Stim frequency : 0,320							Power of performed test with alpha = 0.0500: for Stim frequency : 0.907
20160706a	After	20Hz	1.1691	7.654	1.0844	4.4319		Power of performed test with alpha = 0.0500: for Stim period x Stim frequency : 0.685							Power of performed test with alpha = 0,0500: for Stim period x Stim frequency : 0,999							Power of performed test with alpha = 0.0500: for Stim period x Stim frequency : 0.927							Power of performed test with alpha = 0.0500: for Stim period : 0.205
20160706b	After	20Hz	0.9554	3.3638	0.5202	1.8431																							Power of performed test with alpha = 0.0500: for Stim frequency : 0.0500
20160506a	Before	10Hz	1.2382	12.5926	2.3197	5.6512		Expected Mean Squares:							Expected Mean Squares:							Expected Mean Squares:							Power of performed test with alpha = 0.0500: for Stim period x Stim frequency : 0.0500
20160506b	Before	10Hz						Approximate DF Residual for Stim period = 18.000							Approximate DF Residual for Stim period = 18,000							Approximate DF Residual for Stim period = 18.000
20160510a	Before	10Hz	1.1188	16.228	3.7319	7.2594		Approximate DF Residual for Stim frequency = 9.000							Approximate DF Residual for Stim frequency = 9,000							Approximate DF Residual for Stim frequency = 9.000							Expected Mean Squares:
20160510b	Before	10Hz						Approximate DF Residual for Subjects = 12.505							Approximate DF Residual for Subjects = 13,582							Approximate DF Residual for Subjects = 10.185							Approximate DF Residual for Stim period = 18.000
20160511a	Before	10Hz	0.704	7.8975	0.9823	4.3584																							Approximate DF Residual for Stim frequency = 9.000
20160511b	Before	10Hz	0.7982	6.6889	0.8351	3.2521		Expected MS(Stim period) = var(res) + 2.000 var(Stim period x Subjects) + var(Stim period)							Expected MS(Stim period) = var(res) + 2,000 var(Stim period x Subjects) + var(Stim period)							Expected MS(Stim period) = var(res) + 2.000 var(Stim period x Subjects) + var(Stim period)							Approximate DF Residual for Subjects = 9.675
20160513a	Before	10Hz	0.7731	11.895	1.8567	5.0312		Expected MS(Stim frequency) = var(res) + 3.000 var(Stim frequency x Subjects) + var(Stim frequency)							Expected MS(Stim frequency) = var(res) + 3,000 var(Stim frequency x Subjects) + var(Stim frequency)							Expected MS(Stim frequency) = var(res) + 3.000 var(Stim frequency x Subjects) + var(Stim frequency)
20160513b	Before	10Hz	0.9491	18.9505	4.2475	6.6182		Expected MS(Subjects) = var(res) + 2.000 var(Stim period x Subjects) +3.000 var(Stim frequency x Subjects) +6.000 var(Subjects)							Expected MS(Subjects) = var(res) + 2,000 var(Stim period x Subjects) +3,000 var(Stim frequency x Subjects) +6,000 var(Subjects)							Expected MS(Subjects) = var(res) + 2.000 var(Stim period x Subjects) +3.000 var(Stim frequency x Subjects) +6.000 var(Subjects)							Expected MS(Stim period) = var(res) + 2.000 var(Stim period x Subjects) + var(Stim period)
20160623a	Before	10Hz	1.3702	7.9592	1.8128	5.0023		Expected MS(Stim period x Subjects) = var(res) + 2.000 var(Stim period x Subjects)							Expected MS(Stim period x Subjects) = var(res) + 2,000 var(Stim period x Subjects)							Expected MS(Stim period x Subjects) = var(res) + 2.000 var(Stim period x Subjects)							Expected MS(Stim frequency) = var(res) + 3.000 var(Stim frequency x Subjects) + var(Stim frequency)
20160623b	Before	10Hz	1.4708	10.886	2.6131	5.5724		Expected MS(Stim period x Stim frequency) = var(res) + var(Stim period x Stim frequency)							Expected MS(Stim period x Stim frequency) = var(res) + var(Stim period x Stim frequency)							Expected MS(Stim period x Stim frequency) = var(res) + var(Stim period x Stim frequency)							Expected MS(Subjects) = var(res) + 2.000 var(Stim period x Subjects) +3.000 var(Stim frequency x Subjects) +6.000 var(Subjects)
20160706a	Before	10Hz	1.1502	5.8857	0.7048	3.6707		Expected MS(Stim frequency x Subjects) = var(res) + 3.000 var(Stim frequency x Subjects)							Expected MS(Stim frequency x Subjects) = var(res) + 3,000 var(Stim frequency x Subjects)							Expected MS(Stim frequency x Subjects) = var(res) + 3.000 var(Stim frequency x Subjects)							Expected MS(Stim period x Subjects) = var(res) + 2.000 var(Stim period x Subjects)
20160706b	Before	10Hz	1.2319	3.4817	0.4186	1.9219		Expected MS(Residual) = var(res)							Expected MS(Residual) = var(res)							Expected MS(Residual) = var(res)							Expected MS(Stim period x Stim frequency) = var(res) + var(Stim period x Stim frequency)
20160506a	During	10Hz	0.3206	9.5333	0.3086	6.085																							Expected MS(Stim frequency x Subjects) = var(res) + 3.000 var(Stim frequency x Subjects)
20160506b	During	10Hz						Least square means for Stim period :							Least square means for Stim period :							Least square means for Stim period :							Expected MS(Residual) = var(res)
20160510a	During	10Hz	0.9051	13.9121	2.5993	7.0959		Group	Mean						Group	Mean						Group	Mean
20160510b	During	10Hz						Before	1.101						Before	10,309						Before	2.064						Least square means for Stim period :
20160511a	During	10Hz	0.7354	7.2129	0.7064	4.5922		During	0.872						During	8,950						During	1.651						Group	Mean
20160511b	During	10Hz	0	0	0	3.286		After	1.095						After	9,928						After	2.056						Before	4.905
20160513a	During	10Hz	0.7354	8.6905	0.7635	5.3149		Std Err of LS Mean = 0.0703							Std Err of LS Mean = 0,316							Std Err of LS Mean = 0.0927							During	5.035
20160513b	During	10Hz	0.9742	15.2485	4.4769	6.4724																							After	4.866
20160623a	During	10Hz	0.9617	7.2901	1.2658	5.4806		Least square means for Stim frequency :							Least square means for Stim frequency :							Least square means for Stim frequency :							Std Err of LS Mean = 0.0608
20160623b	During	10Hz	0.6725	10.2077	1.1922	6.0493		Group	Mean						Group	Mean						Group	Mean
20160706a	During	10Hz	0	0	0	3.7448		20Hz	1.117						20Hz	10,208						20Hz	2.166						Least square means for Stim frequency :
20160706b	During	10Hz	1.2885	3.2271	0.1538	1.9686		10Hz	0.929						10Hz	9,250						10Hz	1.681						Group	Mean
20160506a	After	10Hz	1.1502	11.414	2.1105	6.0154		Std Err of LS Mean = 0.0379							Std Err of LS Mean = 0,343							Std Err of LS Mean = 0.0913							20Hz	4.961
20160506b	After	10Hz																											10Hz	4.91
20160510a	After	10Hz	0.9428	14.9772	3.273	7.2859		Least square means for Stim period x Stim frequency :							Least square means for Stim period x Stim frequency :							Least square means for Stim period x Stim frequency :							Std Err of LS Mean = 0.139
20160510b	After	10Hz						Group	Mean						Group	Mean						Group	Mean
20160511a	After	10Hz	0.572	7.0664	0.72	4.2711		Before x 20Hz	1.122						Before x 20Hz	10,371						Before x 20Hz	2.177						Least square means for Stim period x Stim frequency :
20160511b	After	10Hz	0.7542	7.1203	0.829	3.2393		Before x 10Hz	1.08						Before x 10Hz	10,246						Before x 10Hz	1.952						Group	Mean
20160513a	After	10Hz	0.7857	12.693	1.9608	5.2664		During x 20Hz	1.085						During x 20Hz	10,368						During x 20Hz	2.155						Before x 20Hz	4.977
20160513b	After	10Hz	0.9617	16.613	4.1911	6.8703		During x 10Hz	0.659						During x 10Hz	7,532						During x 10Hz	1.147						Before x 10Hz	4.834
20160623a	After	10Hz	1.1439	8.4497	2.0255	4.9252		After x 20Hz	1.145						After x 20Hz	9,885						After x 20Hz	2.167						During x 20Hz	5.06
20160623b	After	10Hz	1.3199	12.6854	2.398	5.8329		After x 10Hz	1.046						After x 10Hz	9,971						After x 10Hz	1.945						During x 10Hz	5.009
20160706a	After	10Hz	1.7725	5.4277	1.5207	3.2783		Std Err of LS Mean = 0.0630							Std Err of LS Mean = 0,283							Std Err of LS Mean = 0.107							After x 20Hz	4.844
20160706b	After	10Hz	1.0559	3.2605	0.4203	1.9008																							After x 10Hz	4.889
																													Std Err of LS Mean = 0.0701
								All Pairwise Multiple Comparison Procedures (Holm-Sidak method):							All Pairwise Multiple Comparison Procedures (Holm-Sidak method):							All Pairwise Multiple Comparison Procedures (Holm-Sidak method):
								Overall significance level = 0.05							Overall significance level = 0,05							Overall significance level = 0.05
								Comparisons for factor: Stim period							Comparisons for factor: Stim period							Comparisons for factor: Stim period
								Comparison	Diff of Means	t	P	P<0.050			Comparison	Diff of Means	t	P	P<0,050			Comparison	Diff of Means	t	P	P<0.050
								Before vs. During	0.229	2.305	0.096	No			Before vs. During	1,359	3,042	0,021	Yes			Before vs. During	0.414	3.154	0.016	Yes
								After vs. During	0.223	2.245	0.074	No			After vs. During	0,978	2,189	0,082	No			After vs. During	0.405	3.091	0.013	Yes
								Before vs. After	0.00603	0.0607	0.952	No			Before vs. After	0,381	0,853	0,405	No			Before vs. After	0.00832	0.0634	0.95	No
								Comparisons for factor: Stim frequency							Comparisons for factor: Stim frequency							Comparisons for factor: Stim frequency
								Comparison	Diff of Means	t	P	P<0.050			Comparison	Diff of Means	t	P	P<0,050			Comparison	Diff of Means	t	P	P<0.050
								20Hz vs. 10Hz	0.189	3.517	0.007	Yes			20Hz vs. 10Hz	0,958	1,973	0,080	No			20Hz vs. 10Hz	0.485	3.758	0.004	Yes
								Comparisons for factor: Stim frequency within Before							Comparisons for factor: Stim frequency within Before							Comparisons for factor: Stim frequency within Before
								Comparison	Diff of Means	t	P	P<0.05			Comparison	Diff of Means	t	P	P<0,05			Comparison	Diff of Means	t	P	P<0.05
								20Hz vs. 10Hz	0.0416	0.461	0.649	No			20Hz vs. 10Hz	0,124	0,213	0,834	No			20Hz vs. 10Hz	0.224	1.257	0.221	No
								Comparisons for factor: Stim frequency within During							Comparisons for factor: Stim frequency within During							Comparisons for factor: Stim frequency within During
								Comparison	Diff of Means	t	P	P<0.05			Comparison	Diff of Means	t	P	P<0,05			Comparison	Diff of Means	t	P	P<0.05
								20Hz vs. 10Hz	0.426	4.71	<0.001	Yes			20Hz vs. 10Hz	2,836	4,844	<0,001	Yes			20Hz vs. 10Hz	1.008	5.648	<0.001	Yes
								Comparisons for factor: Stim frequency within After							Comparisons for factor: Stim frequency within After							Comparisons for factor: Stim frequency within After
								Comparison	Diff of Means	t	P	P<0.05			Comparison	Diff of Means	t	P	P<0,05			Comparison	Diff of Means	t	P	P<0.05
								20Hz vs. 10Hz	0.0987	1.092	0.284	No			10Hz vs. 20Hz	0,0861	0,147	0,885	No			20Hz vs. 10Hz	0.223	1.246	0.225	No
								Comparisons for factor: Stim period within 20Hz							Comparisons for factor: Stim period within 20Hz							Comparisons for factor: Stim period within 20Hz
								Comparison	Diff of Means	t	P	P<0.05			Comparison	Diff of Means	t	P	P<0,05			Comparison	Diff of Means	t	P	P<0.05
								After vs. During	0.0597	0.507	0.943	No			Before vs. After	0,486	0,920	0,744	No			Before vs. During	0.0217	0.128	0.999	No
								Before vs. During	0.0372	0.316	0.939	No			During vs. After	0,483	0,914	0,601	No			After vs. During	0.0124	0.0734	0.997	No
								After vs. Before	0.0225	0.191	0.85	No			Before vs. During	0,00306	0,00578	0,995	No			Before vs. After	0.00929	0.0549	0.957	No
								Comparisons for factor: Stim period within 10Hz							Comparisons for factor: Stim period within 10Hz							Comparisons for factor: Stim period within 10Hz
								Comparison	Diff of Means	t	P	P<0.05			Comparison	Diff of Means	t	P	P<0,05			Comparison	Diff of Means	t	P	P<0.05
								Before vs. During	0.421	3.579	0.004	Yes			Before vs. During	2,714	5,133	<0,001	Yes			Before vs. During	0.806	4.763	<0.001	Yes
								After vs. During	0.387	3.285	0.005	Yes			After vs. During	2,439	4,611	<0,001	Yes			After vs. During	0.798	4.72	<0.001	Yes
								Before vs. After	0.0346	0.294	0.771	No			Before vs. After	0,276	0,521	0,606	No			Before vs. After	0.00734	0.0434	0.966	No

## Sheet: Fig 6B part 2 and S1D
Subject	Stim period	Stim frequency	Traube-Hering waves	RSA		Traube-Hering waves							RSA
20160506a	Before	20Hz	0.3743	2.663		Two Way Repeated Measures ANOVA (Two Factor Repetition)							Two Way Repeated Measures ANOVA (Two Factor Repetition)
20160506b	Before	20Hz	2.5392	4.7479
20160510a	Before	20Hz	0.4865	9.2874
20160510b	Before	20Hz	1.1473	18.9339
20160511a	Before	20Hz	0.7437	13.0279		General Linear Model							General Linear Model
20160511b	Before	20Hz	0.4175	1.2852
20160513a	Before	20Hz	0.5661	0.894		Dependent Variable: TH waves							Dependent Variable: RSA
20160513b	Before	20Hz	2.176	8.9287
20160623a	Before	20Hz	0.6243	14.292		The following subjects were deleted from the calculations because of the pattern of missing data:							The following subjects were deleted from the calculations because of the pattern of missing data:
20160623b	Before	20Hz	2.289	49.5626		20160506b							20160506b
20160706a	Before	20Hz	0.2526	7.973		20160510b							20160510b
20160706b	Before	20Hz	0.2883	3.6789
20160506a	During	20Hz	0.6732	0.0516
20160506b	During	20Hz	1.6004	0.235		Normality Test (Shapiro-Wilk)	Passed	(P = 0.129)					Normality Test (Shapiro-Wilk)	Passed	(P = 0.590)
20160510a	During	20Hz	0.6732	0.591
20160510b	During	20Hz	1.8446	1.835		Equal Variance Test:	Passed	(P = 0.245)					Equal Variance Test:	Passed	(P = 0.826)
20160511a	During	20Hz		4.315
20160511b	During	20Hz	1.2081	0.3735		Source of Variation	DF	SS	MS	F	P		Source of Variation	DF	SS	MS	F	P
20160513a	During	20Hz	0.3136	0.0764		Subjects	9	29.861	3.318	137.719	0.283		Subjects	9	5486.36	609.596	4.46	0.003
20160513b	During	20Hz	2.7898	1.764		Stim period	2	0.139	0.0697	1.228	0.314		Stim period	2	1420.5	710.252	5.348	0.015
20160623a	During	20Hz	2.2764	1.429		Stim period x Subjects	18	1	0.0556				Stim period x Subjects	18	2390.64	132.813
20160623b	During	20Hz	1.9049	4.3724		Stim frequency	1	0.691	0.691	9.284	0.013		Stim frequency	1	0.169	0.169	0.0172	0.898
20160706a	During	20Hz	0	0.9003		Stim frequency x Subjects	9	0.665	0.0739				Stim frequency x Subjects	9	88.216	9.802
20160706b	During	20Hz	0.0424	0.68		Stim period x Stim frequency	2	1.43	0.715	6.751	0.007		Stim period x Stim frequency	2	12.992	6.496	1.093	0.356
20160506a	After	20Hz	0.3613	3.6239		Residual	17	1.8	0.106				Residual	18	106.983	5.943
20160506b	After	20Hz	2.2295	4.056		Total	58	35.928	0.619				Total	59	9505.86	161.116
20160510a	After	20Hz	0.4975	8.4111
20160510b	After	20Hz	0.9092	23.4112
20160511a	After	20Hz	0.8292	14.087		Main effects cannot be properly interpreted if significant interaction is determined. This is because the size of a factor's effect depends upon the level of the other factor.							The difference in the mean values among the different levels of Stim period is greater than would be expected by chance after allowing for effects of differences in Stim frequency. There is a statistically significant difference (P = 0.015). To isolate which group(s) differ from the others use a multiple comparison procedure.
20160511b	After	20Hz	0.3075	6.4973
20160513a	After	20Hz	0.6315	0.769		The effect of different levels of Stim period depends on what level of Stim frequency is present. There is a statistically significant interaction between Stim period and Stim frequency. (P = 0.007)							The difference in the mean values among the different levels of Stim frequency is not great enough to exclude the possibility that the difference is just due to random sampling variability after allowing for the effects of differences in Stim period. There is not a statistically significant difference (P = 0.898).
20160513b	After	20Hz	1.9874	6.5008
20160623a	After	20Hz	0.7679	28.387		Power of performed test with alpha = 0.0500: for Stim period : 0.0789							The effect of different levels of Stim period does not depend on what level of Stim frequency is present. There is not a statistically significant interaction between Stim period and Stim frequency. (P = 0.356)
20160623b	After	20Hz	2.3036	49.5483		Power of performed test with alpha = 0.0500: for Stim frequency : 0.739
20160706a	After	20Hz	0.2006	5.2101		Power of performed test with alpha = 0.0500: for Stim period x Stim frequency : 0.805							Power of performed test with alpha = 0.0500: for Stim period : 0.678
20160706b	After	20Hz	0.19	3.0827									Power of performed test with alpha = 0.0500: for Stim frequency : 0.0500
20160506a	Before	10Hz	0.2419	1.4603		Expected Mean Squares:							Power of performed test with alpha = 0.0500: for Stim period x Stim frequency : 0.0609
20160506b	Before	10Hz				Approximate DF Residual for Stim period = 19.599
20160510a	Before	10Hz	0.3884	5.0625		Approximate DF Residual for Stim frequency = 9.427							Expected Mean Squares:
20160510b	Before	10Hz				Approximate DF Residual for Subjects = 0.408							Approximate DF Residual for Stim period = 18.000
20160511a	Before	10Hz	0.8279	11.499									Approximate DF Residual for Stim frequency = 9.000
20160511b	Before	10Hz	0.361	7.1423		Expected MS(Stim period) = var(res) + 1.900 var(Stim period x Subjects) + var(Stim period)							Approximate DF Residual for Subjects = 18.818
20160513a	Before	10Hz	0.6973	0.845		Expected MS(Stim frequency) = var(res) + 2.842 var(Stim frequency x Subjects) + var(Stim frequency)
20160513b	Before	10Hz	2.2855	6.8847		Expected MS(Subjects) = var(res) + 1.926 var(Stim period x Subjects) +2.889 var(Stim frequency x Subjects) +5.778 var(Subjects)							Expected MS(Stim period) = var(res) + 2.000 var(Stim period x Subjects) + var(Stim period)
20160623a	Before	10Hz	0.8318	27.9009		Expected MS(Stim period x Subjects) = var(res) + 1.944 var(Stim period x Subjects)							Expected MS(Stim frequency) = var(res) + 3.000 var(Stim frequency x Subjects) + var(Stim frequency)
20160623b	Before	10Hz	2.2121	52.2854		Expected MS(Stim period x Stim frequency) = var(res) + var(Stim period x Stim frequency)							Expected MS(Subjects) = var(res) + 2.000 var(Stim period x Subjects) +3.000 var(Stim frequency x Subjects) +6.000 var(Subjects)
20160706a	Before	10Hz	0.3298	4.7291		Expected MS(Stim frequency x Subjects) = var(res) + 2.889 var(Stim frequency x Subjects)							Expected MS(Stim period x Subjects) = var(res) + 2.000 var(Stim period x Subjects)
20160706b	Before	10Hz	0.1877	3.2989		Expected MS(Residual) = var(res)							Expected MS(Stim period x Stim frequency) = var(res) + var(Stim period x Stim frequency)
20160506a	During	10Hz	0	0.0312									Expected MS(Stim frequency x Subjects) = var(res) + 3.000 var(Stim frequency x Subjects)
20160506b	During	10Hz				Least square means for Stim period :							Expected MS(Residual) = var(res)
20160510a	During	10Hz	0.1199	1.834		Group	Mean	SEM
20160510b	During	10Hz				Before	0.829	0.0527					Least square means for Stim period :
20160511a	During	10Hz	0	2.689		During	0.713	0.0569					Group	Mean	SEM
20160511b	During	10Hz	0	0.7686		After	0.81	0.0527					Before	11.635	2.577
20160513a	During	10Hz	0	0.345									During	1.477	2.577
20160513b	During	10Hz	1.7696	2.874									After	11.955	2.577
20160623a	During	10Hz	0	1.2983		Least square means for Stim frequency :
20160623b	During	10Hz	1.7395	3.236		Group	Mean	SEM
20160706a	During	10Hz	0	0.6802		20Hz	0.894	0.0523					Least square means for Stim frequency :
20160706b	During	10Hz	0.0988	1.2309		10Hz	0.674	0.0496					Group	Mean	SEM
20160506a	After	10Hz	0.1918	1.8629									20Hz	8.409	0.572
20160506b	After	10Hz											10Hz	8.303	0.572
20160510a	After	10Hz	0.3053	3.2265		Least square means for Stim period x Stim frequency :
20160510b	After	10Hz				Group	Mean	SEM
20160511a	After	10Hz	0.8176	8.2337		Before x 20Hz	0.822	0.103					Least square means for Stim period x Stim frequency :
20160511b	After	10Hz	0.3882	6.2498		Before x 10Hz	0.836	0.103					Group	Mean
20160513a	After	10Hz	0.6687	0.9374		During x 20Hz	1.054	0.119					Before x 20Hz	11.159
20160513b	After	10Hz	2.3309	6.7603		During x 10Hz	0.373	0.103					Before x 10Hz	12.111
20160623a	After	10Hz	0.8095	32.304		After x 20Hz	0.808	0.103					During x 20Hz	1.455
20160623b	After	10Hz	1.877	42.1078		After x 10Hz	0.812	0.103					During x 10Hz	1.499
20160706a	After	10Hz	0.321	8.5002									After x 20Hz	12.612
20160706b	After	10Hz	0.4127	2.8005									After x 10Hz	11.298
													Std Err of LS Mean = 0.771
						All Pairwise Multiple Comparison Procedures (Holm-Sidak method):
						Overall significance level = 0.05
													All Pairwise Multiple Comparison Procedures (Holm-Sidak method):
						Comparisons for factor: Stim period							Overall significance level = 0.05
						Comparison	Diff of Means	t	P	P<0.050
						Before vs. During	0.116	1.494	0.391	No			Comparisons for factor: Stim period
						After vs. During	0.0968	1.247	0.404	No			Comparison	Diff of Means	t	P	P<0.050
						Before vs. After	0.0191	0.257	0.8	No			After vs. During	10.478	2.875	0.03	Yes
													Before vs. During	10.158	2.787	0.024	Yes
													After vs. Before	0.32	0.0878	0.931	No
						Comparisons for factor: Stim frequency
						Comparison	Diff of Means	t	P	P<0.050
						20Hz vs. 10Hz	0.221	3.058	0.014	Yes			Comparisons for factor: Stim frequency
													Comparison	Diff of Means	t	P	P<0.050
													20Hz vs. 10Hz	0.106	0.131	0.898	No
						Comparisons for factor: Stim frequency within Before
						Comparison	Diff of Means	t	P	P<0.05
						10Hz vs. 20Hz	0.0145	0.105	0.917	No			Comparisons for factor: Stim frequency within Before
													Comparison	Diff of Means	t	P	P<0.05
													10Hz vs. 20Hz	0.952	0.791	0.436	No
						Comparisons for factor: Stim frequency within During
						Comparison	Diff of Means	t	P	P<0.05
						20Hz vs. 10Hz	0.681	4.576	<0.001	Yes			Comparisons for factor: Stim frequency within During
													Comparison	Diff of Means	t	P	P<0.05
													10Hz vs. 20Hz	0.0434	0.0361	0.971	No
						Comparisons for factor: Stim frequency within After
						Comparison	Diff of Means	t	P	P<0.05
						10Hz vs. 20Hz	0.00462	0.0336	0.973	No			Comparisons for factor: Stim frequency within After
													Comparison	Diff of Means	t	P	P<0.05
													20Hz vs. 10Hz	1.313	1.092	0.285	No
						Comparisons for factor: Stim period within 20Hz
						Comparison	Diff of Means	t	P	P<0.05
						During vs. After	0.246	1.8	0.225	No			Comparisons for factor: Stim period within 20Hz
						During vs. Before	0.232	1.696	0.189	No			Comparison	Diff of Means	t	P	P<0.05
						Before vs. After	0.0142	0.112	0.911	No			After vs. During	11.156	2.995	0.022	Yes
													Before vs. During	9.704	2.605	0.034	Yes
													After vs. Before	1.452	0.39	0.701	No
						Comparisons for factor: Stim period within 10Hz
						Comparison	Diff of Means	t	P	P<0.05
						Before vs. During	0.464	3.664	0.003	Yes			Comparisons for factor: Stim period within 10Hz
						After vs. During	0.439	3.474	0.003	Yes			Comparison	Diff of Means	t	P	P<0.05
						Before vs. After	0.0241	0.19	0.85	No			Before vs. During	10.612	2.849	0.03	Yes
													After vs. During	9.8	2.631	0.032	Yes
													Before vs. After	0.812	0.218	0.83	No

## Sheet: Fig 6D and S1C
Subject	Stim period	Stim frequency	Time RespSNA beginning during - before stim	Time RespSNA peak during - before stim	Time RespSNA end during - before stim		Time RespSNA beginning during - before stim							Time RespSNA peak during - before stim							Time RespSNA end during - before stim							10Hz
20160506a	Before	20Hz	-0.999	0	0.3237		Two Way Repeated Measures ANOVA (Two Factor Repetition)							Two Way Repeated Measures ANOVA (Two Factor Repetition)							Two Way Repeated Measures ANOVA (Two Factor Repetition)							One Way Repeated Measures Analysis of Variance
20160506b	Before	20Hz	-0.7071	-0.0132	0.2206
20160510a	Before	20Hz	-0.8636	0.0365	0.2979
20160510b	Before	20Hz	-0.7329	-0.0943	0.1622
20160511a	Before	20Hz	-0.8316	-0.008171	0.1427		General Linear Model							General Linear Model							General Linear Model							Dependent Variable: Col 22
20160511b	Before	20Hz	-0.6807	-0.027	0.2181
20160513a	Before	20Hz	-0.6241	0.0107	0.2495		Dependent Variable: Time beginning RespSNA							Dependent Variable: Time peak RespSNA							Dependent Variable: Time end RespSNA							Normality Test (Shapiro-Wilk)	Failed	(P < 0.050)
20160513b	Before	20Hz	-0.9133	-0.071	0.1113
20160623a	Before	20Hz	-1.0515	0.0735	0.2872		The following subjects were deleted from the calculations because of the pattern of missing data:							The following subjects were deleted from the calculations because of the pattern of missing data:							The following subjects were deleted from the calculations because of the pattern of missing data:
20160623b	Before	20Hz	-0.8378	-0.0018856	0.1615		20160506b							20160506b							20160506b							Test execution ended by user request, RM ANOVA on Ranks begun
20160706a	Before	20Hz	-0.6179	0.0861	0.8026		20160510b							20160510b							20160510b
20160706b	Before	20Hz	-0.8001	0.105	0.4067																							Friedman Repeated Measures Analysis of Variance on Ranks
20160506a	During	20Hz	-0.9887	-0.0031427	0.1376
20160506b	During	20Hz	-0.8655	-0.0509	0.2508		Normality Test (Shapiro-Wilk)	Passed	(P = 0.452)					Normality Test (Shapiro-Wilk)	Passed	(P = 0.985)					Normality Test (Shapiro-Wilk)	Failed	(P < 0.050)
20160510a	During	20Hz	-0.8686	0.0465	0.3432
20160510b	During	20Hz	-0.6926	-0.1094	0.1823		Equal Variance Test:	Passed	(P = 0.248)					Equal Variance Test:	Passed	(P = 0.856)					Equal Variance Test:	Passed	(P = 0.997)					Dependent Variable: Col 22
20160511a	During	20Hz	-0.6933	0.017	0.4884
20160511b	During	20Hz	-0.5927	-0.008171	0.1992		Source of Variation	DF	SS	MS	F	P		Source of Variation	DF	SS	MS	F	P		Source of Variation	DF	SS	MS	F	P		Group	N	Missing	Median	0.25	0.75
20160513a	During	20Hz	-0.731	-0.0145	0.237		Subjects	9	1.609	0.179	4.259	0.017		Subjects	9	0.157	0.0175	4.024	0.032		Subjects	9	0.657	0.073	3.796	0.071		Before	10	0	0.303	0.206	0.385
20160513b	During	20Hz	-0.9195	-0.0899	0.1427		Stim period	2	0.315	0.157	4.889	0.02		Stim period	2	0.00263	0.00132	0.382	0.688		Stim period	2	0.0703	0.0352	1.155	0.337		During	10	0	0.174	0.0834	0.229
20160623a	During	20Hz	-1.1458	0.0861	0.4444		Stim period x Subjects	18	0.579	0.0322				Stim period x Subjects	18	0.062	0.00345				Stim period x Subjects	18	0.548	0.0304				After	10	0	0.237	0.157	0.342
20160623b	During	20Hz	-1.0264	-0.0396	0.149		Stim frequency	1	0.404	0.404	13.66	0.005		Stim frequency	1	0.00196	0.00196	0.565	0.472		Stim frequency	1	0.00897	0.00897	1.724	0.222
20160706a	During	20Hz	-0.4419	0.0233	0.237		Stim frequency x Subjects	9	0.266	0.0296				Stim frequency x Subjects	9	0.0313	0.00348				Stim frequency x Subjects	9	0.0468	0.0052
20160706b	During	20Hz	-0.687	0.1301	0.3752		Stim period x Stim frequency	2	0.212	0.106	5.362	0.015		Stim period x Stim frequency	2	0.00546	0.00273	1.056	0.368		Stim period x Stim frequency	2	0.0474	0.0237	1.444	0.262		Chi-square= 2.000 with 2 degrees of freedom. (P = 0.368)
20160506a	After	20Hz	-1.1596	-0.0031427	0.1527		Residual	18	0.356	0.0198				Residual	18	0.0465	0.00258				Residual	18	0.295	0.0164
20160506b	After	20Hz	-0.7674	-0.0283	0.2282		Total	59	3.742	0.0634				Total	59	0.307	0.0052				Total	59	1.674	0.0284				The differences in the median values among the treatment groups are not great enough to exclude the possibility that the difference is due to random sampling variability; there is not a statistically significant difference (P = 0.368)
20160510a	After	20Hz	-0.8636	0.0012571	0.3633
20160510b	After	20Hz	-0.7278	-0.0993	0.1219
20160511a	After	20Hz	-0.8316	0.0043997	0.2998		Main effects cannot be properly interpreted if significant interaction is determined. This is because the size of a factor's effect depends upon the level of the other factor.							The difference in the mean values among the different levels of Stim period is not great enough to exclude the possibility that the difference is just due to random sampling variability after allowing for the effects of differences in Stim frequency. There is not a statistically significant difference (P = 0.688).							The difference in the mean values among the different levels of Stim period is not great enough to exclude the possibility that the difference is just due to random sampling variability after allowing for the effects of differences in Stim frequency. There is not a statistically significant difference (P = 0.337).
20160511b	After	20Hz	-0.7687	-0.0333	0.1992
20160513a	After	20Hz	-0.5424	0.0107	0.2747		The effect of different levels of Stim period depends on what level of Stim frequency is present. There is a statistically significant interaction between Stim period and Stim frequency. (P = 0.015)							The difference in the mean values among the different levels of Stim frequency is not great enough to exclude the possibility that the difference is just due to random sampling variability after allowing for the effects of differences in Stim period. There is not a statistically significant difference (P = 0.472).							The difference in the mean values among the different levels of Stim frequency is not great enough to exclude the possibility that the difference is just due to random sampling variability after allowing for the effects of differences in Stim period. There is not a statistically significant difference (P = 0.222).							20Hz
20160513b	After	20Hz	-0.907	-0.1025	0.0735																							One Way Repeated Measures Analysis of Variance
20160623a	After	20Hz	-1.215	-0.1402	0.1804		Power of performed test with alpha = 0.0500: for Stim period : 0.624							The effect of different levels of Stim period does not depend on what level of Stim frequency is present. There is not a statistically significant interaction between Stim period and Stim frequency. (P = 0.368)							The effect of different levels of Stim period does not depend on what level of Stim frequency is present. There is not a statistically significant interaction between Stim period and Stim frequency. (P = 0.262)
20160623b	After	20Hz	-1.1332	-0.0396	0.3564		Power of performed test with alpha = 0.0500: for Stim frequency : 0.897
20160706a	After	20Hz	-0.6556	0.0735	0.5135		Power of performed test with alpha = 0.0500: for Stim period x Stim frequency : 0.680							Power of performed test with alpha = 0.0500: for Stim period : 0.0500							Power of performed test with alpha = 0.0500: for Stim period : 0.0689
20160706b	After	20Hz	-0.5676	0.1238	0.3878									Power of performed test with alpha = 0.0500: for Stim frequency : 0.0500							Power of performed test with alpha = 0.0500: for Stim frequency : 0.113							Dependent Variable: Col 17
20160506a	Before	10Hz	-1.0013	-0.0018856	0.237		Expected Mean Squares:							Power of performed test with alpha = 0.0500: for Stim period x Stim frequency : 0.0562							Power of performed test with alpha = 0.0500: for Stim period x Stim frequency : 0.108
20160506b	Before	10Hz					Approximate DF Residual for Stim period = 18.000																					Normality Test (Shapiro-Wilk)	Failed	(P < 0.050)
20160510a	Before	10Hz	-0.7373	-0.0207	0.3815		Approximate DF Residual for Stim frequency = 9.000							Expected Mean Squares:							Expected Mean Squares:
20160510b	Before	10Hz					Approximate DF Residual for Subjects = 9.976							Approximate DF Residual for Stim period = 18.000							Approximate DF Residual for Stim period = 18.000
20160511a	Before	10Hz	-0.5361	0.0043997	0.1678									Approximate DF Residual for Stim frequency = 9.000							Approximate DF Residual for Stim frequency = 9.000							Test execution ended by user request, RM ANOVA on Ranks begun
20160511b	Before	10Hz	-0.5801	-0.0207	0.2181		Expected MS(Stim period) = var(res) + 2.000 var(Stim period x Subjects) + var(Stim period)							Approximate DF Residual for Subjects = 7.935							Approximate DF Residual for Subjects = 5.331
20160513a	Before	10Hz	-0.5299	-0.0018856	0.2432		Expected MS(Stim frequency) = var(res) + 3.000 var(Stim frequency x Subjects) + var(Stim frequency)																					Friedman Repeated Measures Analysis of Variance on Ranks
20160513b	Before	10Hz	-0.8316	-0.0962	0.1175		Expected MS(Subjects) = var(res) + 2.000 var(Stim period x Subjects) +3.000 var(Stim frequency x Subjects) +6.000 var(Subjects)							Expected MS(Stim period) = var(res) + 2.000 var(Stim period x Subjects) + var(Stim period)							Expected MS(Stim period) = var(res) + 2.000 var(Stim period x Subjects) + var(Stim period)
20160623a	Before	10Hz	-0.9887	0.0295	0.3815		Expected MS(Stim period x Subjects) = var(res) + 2.000 var(Stim period x Subjects)							Expected MS(Stim frequency) = var(res) + 3.000 var(Stim frequency x Subjects) + var(Stim frequency)							Expected MS(Stim frequency) = var(res) + 3.000 var(Stim frequency x Subjects) + var(Stim frequency)
20160623b	Before	10Hz	-1.0767	-0.0333	0.3941		Expected MS(Stim period x Stim frequency) = var(res) + var(Stim period x Stim frequency)							Expected MS(Subjects) = var(res) + 2.000 var(Stim period x Subjects) +3.000 var(Stim frequency x Subjects) +6.000 var(Subjects)							Expected MS(Subjects) = var(res) + 2.000 var(Stim period x Subjects) +3.000 var(Stim frequency x Subjects) +6.000 var(Subjects)
20160706a	Before	10Hz	-0.6807	0.0735	0.4695		Expected MS(Stim frequency x Subjects) = var(res) + 3.000 var(Stim frequency x Subjects)							Expected MS(Stim period x Subjects) = var(res) + 2.000 var(Stim period x Subjects)							Expected MS(Stim period x Subjects) = var(res) + 2.000 var(Stim period x Subjects)							Dependent Variable: Col 17
20160706b	Before	10Hz	-0.8693	0.0987	0.3627		Expected MS(Residual) = var(res)							Expected MS(Stim period x Stim frequency) = var(res) + var(Stim period x Stim frequency)							Expected MS(Stim period x Stim frequency) = var(res) + var(Stim period x Stim frequency)
20160506a	During	10Hz	-0.1339	0.1175	0.1867									Expected MS(Stim frequency x Subjects) = var(res) + 3.000 var(Stim frequency x Subjects)							Expected MS(Stim frequency x Subjects) = var(res) + 3.000 var(Stim frequency x Subjects)							Group	N	Missing	Median	0.25	0.75
20160506b	During	10Hz					Least square means for Stim period :							Expected MS(Residual) = var(res)							Expected MS(Residual) = var(res)							Before	12	0	0.235	0.162	0.317
20160510a	During	10Hz	-0.7436	-0.0773	0.1615		Group	Mean																				During	12	0	0.237	0.157	0.367
20160510b	During	10Hz					Before	-0.803						Least square means for Stim period :							Least square means for Stim period :							After	12	0	0.251	0.16	0.362
20160511a	During	10Hz	-0.5361	0.017	0.1992		During	-0.647						Group	Mean						Group	Mean
20160511b	During	10Hz	0	0	0		After	-0.8						Before	0.0118						Before	0.299
20160513a	During	10Hz	-0.4921	0.0233	0.2432		Std Err of LS Mean = 0.0401							During	-0.000911						During	0.225						Chi-square= 0.128 with 2 degrees of freedom. (P = 0.938)
20160513b	During	10Hz	-0.819	-0.0459	0.1552									After	-0.00336						After	0.296
20160623a	During	10Hz	-0.7373	0.0107	0.2244		Least square means for Stim frequency :							Std Err of LS Mean = 0.0131							Std Err of LS Mean = 0.0390							The differences in the median values among the treatment groups are not great enough to exclude the possibility that the difference is due to random sampling variability; there is not a statistically significant difference (P = 0.938)
20160623b	During	10Hz	-0.5613	-0.3224	0.1113		Group	Mean
20160706a	During	10Hz	0	0	0		20Hz	-0.832						Least square means for Stim frequency :							Least square means for Stim frequency :
20160706b	During	10Hz	-0.8316	0.1113	0.4569		10Hz	-0.668						Group	Mean						Group	Mean
20160506a	After	10Hz	-1.0264	-0.008171	0.1238		Std Err of LS Mean = 0.0314							20Hz	0.00821						20Hz	0.285
20160506b	After	10Hz												10Hz	-0.00323						10Hz	0.261
20160510a	After	10Hz	-0.7436	-0.0459	0.1992		Least square means for Stim period x Stim frequency :							Std Err of LS Mean = 0.0108							Std Err of LS Mean = 0.0132
20160510b	After	10Hz					Group	Mean
20160511a	After	10Hz	-0.4104	-0.0018856	0.1615		Before x 20Hz	-0.822						Least square means for Stim period x Stim frequency :							Least square means for Stim period x Stim frequency :
20160511b	After	10Hz	-0.5739	-0.0018856	0.1804		Before x 10Hz	-0.783						Group	Mean						Group	Mean
20160513a	After	10Hz	-0.511	0.0043997	0.2747		During x 20Hz	-0.809						Before x 20Hz	0.0204						Before x 20Hz	0.3
20160513b	After	10Hz	-0.819	-0.0145	0.1427		During x 10Hz	-0.485						Before x 10Hz	0.00314						Before x 10Hz	0.297
20160623a	After	10Hz	-0.8064	0.0107	0.3375		After x 20Hz	-0.864						During x 20Hz	0.0148						During x 20Hz	0.275
20160623b	After	10Hz	-0.9635	-0.0522	0.3564		After x 10Hz	-0.735						During x 10Hz	-0.0166						During x 10Hz	0.174
20160706a	After	10Hz	-0.7561	0.1113	1.0163		Std Err of LS Mean = 0.0445							After x 20Hz	-0.0105						After x 20Hz	0.28
20160706b	After	10Hz	-0.7373	0.0358	0.3187									After x 10Hz	0.00377						After x 10Hz	0.311
														Std Err of LS Mean = 0.0161							Std Err of LS Mean = 0.0405
							All Pairwise Multiple Comparison Procedures (Holm-Sidak method):
							Overall significance level = 0.05
							Comparisons for factor: Stim period
							Comparison	Diff of Means	t	P	P<0.050
							During vs. Before	0.155	2.734	0.04	Yes
							During vs. After	0.152	2.681	0.03	Yes
							After vs. Before	0.00297	0.0523	0.959	No
							Comparisons for factor: Stim frequency
							Comparison	Diff of Means	t	P	P<0.050
							10Hz vs. 20Hz	0.164	3.696	0.005	Yes
							Comparisons for factor: Stim frequency within Before
							Comparison	Diff of Means	t	P	P<0.05
							10Hz vs. 20Hz	0.0388	0.571	0.573	No
							Comparisons for factor: Stim frequency within During
							Comparison	Diff of Means	t	P	P<0.05
							10Hz vs. 20Hz	0.324	4.771	<0.001	Yes
							Comparisons for factor: Stim frequency within After
							Comparison	Diff of Means	t	P	P<0.05
							10Hz vs. 20Hz	0.13	1.909	0.067	No
							Comparisons for factor: Stim period within 20Hz
							Comparison	Diff of Means	t	P	P<0.05
							During vs. After	0.0549	0.762	0.835	No
							Before vs. After	0.0425	0.589	0.806	No
							During vs. Before	0.0125	0.173	0.864	No
							Comparisons for factor: Stim period within 10Hz
							Comparison	Diff of Means	t	P	P<0.05
							During vs. Before	0.298	4.129	<0.001	Yes
							During vs. After	0.249	3.458	0.003	Yes
							After vs. Before	0.0484	0.671	0.507	No

## Sheet: Fig 6C and S1E
Stim Frequency	Delta PNA amplitude (%)	Delta RespSNA AUC (%)		Linear regression analysis delta PNA amplitude (%) vs delta RespSNA AUC (%)			Correlation analysis delta PNA amplitude (%) vs delta RespSNA AUC (%)
10Hz	-68.75	-86.7		Best-fit values ± SE			Pearson r
10Hz	-24.3	-30.35		Slope	1.53 ± 0.3155		r	0.7437
10Hz	-32.36	-28.09		Y-intercept	20.71 ± 11.31		95% confidence interval	0.4596 to 0.8898
10Hz	-75.12	-100		X-intercept	-13.54		R squared	0.5532
10Hz	-58.37	-58.88		1/slope	0.6536
10Hz	-25.55	5.4					P value
10Hz	-24.45	-30.17		95% Confidence Intervals			P (two-tailed)	0.0001
10Hz	-54.12	-54.37		Slope	0.8697 to 2.19		P value summary	***
10Hz	-38.91	-100		Y-intercept	-2.951 to 44.38		Significant? (alpha = 0.05)	Yes
10Hz	-15.23	-63.26		X-intercept	-22.88 to 3.005
20Hz	-15.49	-12.39					Number of XY Pairs	21
20Hz	-33.91	2.09		Goodness of Fit
20Hz	-52.28	-13.27		R square	0.5532
20Hz	-2.51	37.34		Sy.x	29.9
20Hz	-13.08	11.33
20Hz	-7.34	18.19		Is slope significantly non-zero?
20Hz	-16.53	17.99		F	23.52
20Hz	-8.51	4.53		DFn, DFd	1, 19
20Hz	-6.08	53.85		P value	0.0001
20Hz	-24.53	-62.45		Deviation from zero?	Significant
20Hz	-17.24	-16.21
				Equation	Y = 1.53*X + 20.71
				Data
				Number of X values	21
				Maximum number of Y replicates	1
				Total number of values	21
				Number of missing values	0
Stim Frequency	Delta PNA amplitude (%)	Delta Traube-Hering waves (%)		Linear regression analysis delta PNA amplitude (%) vs delta Traube-Hering waves (%)			Correlation analysis delta PNA amplitude (%) vs delta Traube-Hering waves (%)
10Hz	-68.75	-100		Best-fit values ± SE			Pearson r
10Hz	-24.3	-69.15		Slope	2.549 ± 0.957		r	0.5317
10Hz	-32.36	-100		Y-intercept	58.36 ± 35.03		95% confidence interval	0.1166 to 0.7886
10Hz	-75.12	-100		X-intercept	-22.9		R squared	0.2827
10Hz	-58.37	-100		1/slope	0.3924
10Hz	-25.55	-22.57					P value
10Hz	-24.45	-100		95% Confidence Intervals			P (two-tailed)	0.0158
10Hz	-54.12	-21.36		Slope	0.5381 to 4.559		P value summary	*
10Hz	-38.91	-100		Y-intercept	-15.25 to 132		Significant? (alpha = 0.05)	Yes
10Hz	-15.23	-47.36		X-intercept	-41.77 to 19.63
20Hz	-15.49	79.83					Number of XY Pairs	20
20Hz	-33.91	-36.97		Goodness of Fit
20Hz	-52.28	38.39		R square	0.2827
20Hz	-2.51	60.77		Sy.x	89.31
20Hz	-7.34	189.38
20Hz	-16.53	-44.6		Is slope significantly non-zero?
20Hz	-8.51	28.21		F	7.093
20Hz	-6.08	264.65		DFn, DFd	1, 18
20Hz	-24.53	-100		P value	0.0158
20Hz	-17.24	-85.28		Deviation from zero?	Significant
				Equation	Y = 2.549*X + 58.36
				Data
				Number of X values	20
				Maximum number of Y replicates	1
				Total number of values	20
				Number of missing values	0
Stim Frequency	Delta PNA amplitude (%)	Delta RSA (%)		Linear regression analysis delta PNA amplitude (%) vs delta RSA (%)			Correlation analysis delta PNA amplitude (%) vs delta RSA (%)
10Hz	-68.75	-97.86		Best-fit values ± SE			Pearson r
10Hz	-24.3	-63.77		Slope	0.1188 ± 0.1434		r	0.1868
10Hz	-32.36	-76.62		Y-intercept	-78.86 ± 5.139		95% confidence interval	-0.2664 to 0.5723
10Hz	-75.12	-89.24		X-intercept	663.6		R squared	0.0349
10Hz	-58.37	-59.17		1/slope	8.414
10Hz	-25.55	-58.26					P value
10Hz	-24.45	-95.35		95% Confidence Intervals			P (two-tailed)	0.4175
10Hz	-54.12	-93.81		Slope	-0.1813 to 0.419		P value summary	ns
10Hz	-38.91	-85.62		Y-intercept	-89.62 to -68.11		Significant? (alpha = 0.05)	No
10Hz	-15.23	-62.69		X-intercept	166.5 to +infinity
20Hz	-15.49	-98.06					Number of XY Pairs	21
20Hz	-33.91	-95.05		Goodness of Fit
20Hz	-52.28	-93.64		R square	0.0349
20Hz	-2.51	-90.31		Sy.x	13.59
20Hz	-13.08	-66.88
20Hz	-7.34	-70.94		Is slope significantly non-zero?
20Hz	-16.53	-91.45		F	0.687
20Hz	-8.51	-80.24		DFn, DFd	1, 19
20Hz	-6.08	-90		P value	0.4175
20Hz	-24.53	-88.71		Deviation from zero?	Not Significant
20Hz	-17.24	-81.52
				Equation	Y = 0.1188*X - 78.86
				Data
				Number of X values	21
				Maximum number of Y replicates	1
				Total number of values	21
				Number of missing values	0
Stim Frequency	Delta RespSNA AUC (%)	Delta Traube-Hering waves (%)		Linear regression analysis delta RespSNA AUC (%) vs delta Traube-Hering waves (%)			Correlation analysis delta RespSNA AUC (%) vs delta Traube-Hering waves (%)
10Hz	-86.7	-100		Best-fit values ± SE			Pearson r
10Hz	-30.35	-69.15		Slope	1.681 ± 0.3673		r	0.7241
10Hz	-28.09	-100		Y-intercept	23.48 ± 17.94		95% confidence interval	0.4253 to 0.8805
10Hz	-100	-100		X-intercept	-13.97		R squared	0.5243
10Hz	-58.88	-100		1/slope	0.595
10Hz	5.4	-22.57					P value
10Hz	-30.17	-100		95% Confidence Intervals			P (two-tailed)	0.0002
10Hz	-54.37	-21.36		Slope	0.912 to 2.45		P value summary	***
10Hz	-100	-100		Y-intercept	-14.07 to 61.02		Significant? (alpha = 0.05)	Yes
10Hz	-63.26	-47.36		X-intercept	-33.62 to 11.43
20Hz	-12.39	79.83					Number of XY Pairs	21
20Hz	2.09	-36.97		Goodness of Fit
20Hz	-13.27	38.39		R square	0.5243
20Hz	37.34	60.77		Sy.x	70.79
20Hz	18.19	189.38
20Hz	17.99	-44.6		Is slope significantly non-zero?
20Hz	4.53	28.21		F	20.94
20Hz	53.85	264.65		DFn, DFd	1, 19
20Hz	-4.34	-16.78		P value	0.0002
20Hz	-62.45	-100		Deviation from zero?	Significant
20Hz	-16.21	-85.28
				Equation	Y = 1.681*X + 23.48
				Data
				Number of X values	21
				Maximum number of Y replicates	1
				Total number of values	21
				Number of missing values	0
