# Supplementary material for: PreBötzinger complex neurons drive respiratory modulation of blood pressure and heart rate
Source: eLife. 2020 Jun 15;9:e57288. doi: 10.7554/eLife.57288 (PMC7326498; doi:10.7554/eLife.57288)
Supplement: Figure 7—source data 1. [file elife-57288-fig7-data1.xlsx]

## Sheet: Fig 7C
Insp duration (%)	Exp duration (%)
	20160513a	20160513b	20160511a	20160511b	20160506b	20160510a	20160623a	20160623b		Insp duration vs exp duration												Correlation analysis Insp duration vs exp duration
47.14	57.12										20160513a	20160513b	20160511a	20160511b	20160506b	20160510a	20160623a	20160623b	All values	Global (shared)			PNA burst duration %vs.20160513a	PNA burst duration %vs.20160513b	PNA burst duration %vs.20160511a	PNA burst duration %vs.20160511b	PNA burst duration %vs.20160506b	PNA burst duration %vs.20160510a	PNA burst duration %vs.20160623a	PNA burst duration %vs.20160623b	PNA burst duration %vs.All values
42.3	37.75									Comparison of Fits												Pearson r
42.3	45.2									Null hypothesis										One curve for all data sets		r	0.9578	0.884	0.9164	0.9222	0.8413	0.929	0.9355	0.898	0.877
45.93	28.81									Alternative hypothesis										Different curve for each data set		95% confidence interval	0.9134 to 0.9796	0.7423 to 0.95	0.8361 to 0.9582	0.8556 to 0.9587	0.6504 to 0.9323	0.872 to 0.9612	0.8451 to 0.9739	0.7559 to 0.9593	0.8435 to 0.9037
51.97	42.22									P value										<0.0001		R squared	0.9173	0.7815	0.8397	0.8504	0.7078	0.8631	0.8751	0.8065	0.7691
47.14	37.75									Conclusion (alpha = 0.05)										Reject null hypothesis
41.1	33.78									Preferred model										Different curve for each data set		P value
38.68	30.3									F (DFn, DFd)										6.195 (16, 446)		P (two-tailed)	<0.0001	<0.0001	<0.0001	<0.0001	<0.0001	<0.0001	<0.0001	<0.0001	<0.0001
55.6	52.16																					P value summary	****	****	****	****	****	****	****	****	****
31.43	22.35									Different curve for each data set												Significant? (alpha = 0.05)	Yes	Yes	Yes	Yes	Yes	Yes	Yes	Yes	Yes
48.35	30.3									Best-fit values
59.23	49.18									YIntercept	-23.38	33.56	1.053	-26.39	-0.6011	2.928	2.07	-7.329	0.6257			Number of XY Pairs	31	23	33	39	22	43	21	20	232
37.47	25.33									Slope	1.357	0.7635	1.221	1.579	1.361	1.245	1.277	1.365	1.209
89.44	87.92									Std. Error
76.15	84.94									YIntercept	5.35	6.066	6.499	6.962	11.94	4.059	6.313	9.706	2.749
84.61	107.29									Slope	0.07566	0.0881	0.09581	0.1089	0.1956	0.07747	0.1106	0.1576	0.04367
83.4	89.41									95% CI (asymptotic)
80.98	80.97									YIntercept	-34.32 to -12.44	20.95 to 46.18	-12.2 to 14.31	-40.49 to -12.28	-25.51 to 24.31	-5.269 to 11.12	-11.14 to 15.28	-27.72 to 13.06	-4.792 to 6.043
89.44	102.82									Slope	1.202 to 1.512	0.5802 to 0.9467	1.026 to 1.417	1.359 to 1.8	0.9533 to 1.769	1.089 to 1.402	1.045 to 1.508	1.034 to 1.696	1.123 to 1.295
68.89	58.61									Goodness of Fit
82.19	98.85									Degrees of Freedom	29	21	31	37	20	41	19	18	230
97.9	97.85									R square	0.9173	0.7815	0.8397	0.8504	0.7078	0.8631	0.8751	0.8065	0.7691
77.36	92.39									Absolute Sum of Squares	2181	1131	2232	3906	4254	1939	2711	4202	35446
72.52	77.49									Sy.x	8.673	7.34	8.484	10.27	14.58	6.876	11.94	15.28	12.41
71.31	65.07
82.19	72.52									One curve for all data sets
82.19	90.9									Best-fit values
93.07	102.82									YIntercept	0.6257	0.6257	0.6257	0.6257	0.6257	0.6257	0.6257	0.6257	0.6257	0.6257
91.86	111.26									Slope	1.209	1.209	1.209	1.209	1.209	1.209	1.209	1.209	1.209	1.209
87.03	91.4									Std. Error
97.9	116.23									YIntercept	1.94	1.94	1.94	1.94	1.94	1.94	1.94	1.94	1.94	1.94
47.47		73.4								Slope	0.03081	0.03081	0.03081	0.03081	0.03081	0.03081	0.03081	0.03081	0.03081	0.03081
52.95		69.07								95% CI (asymptotic)
54.78		68.87								YIntercept	-3.187 to 4.438	-3.187 to 4.438	-3.187 to 4.438	-3.187 to 4.438	-3.187 to 4.438	-3.187 to 4.438	-3.187 to 4.438	-3.187 to 4.438	-3.187 to 4.438	-3.187 to 4.438
55.69		88.16								Slope	1.148 to 1.269	1.148 to 1.269	1.148 to 1.269	1.148 to 1.269	1.148 to 1.269	1.148 to 1.269	1.148 to 1.269	1.148 to 1.269	1.148 to 1.269	1.148 to 1.269
38.54		65.11								Goodness of Fit
55.94		75.03								Degrees of Freedom										462
37.3		63.24								R square	0.6765	0.4683	0.836	0.7798	0.608	0.8102	0.8488	0.795	0.7691	0.7691
39.78		62.43								Absolute Sum of Squares	8533	2753	2283	5751	5707	2687	3282	4451	35446	70891
39.78		65.11								Sy.x										12.39
69.62		81.19								Constraints
70.86		82.26								YIntercept	YIntercept is shared	YIntercept is shared	YIntercept is shared	YIntercept is shared	YIntercept is shared	YIntercept is shared	YIntercept is shared	YIntercept is shared	YIntercept is shared
67.13		85.21								Slope	Slope is shared	Slope is shared	Slope is shared	Slope is shared	Slope is shared	Slope is shared	Slope is shared	Slope is shared	Slope is shared
80.81		84.94
82.05		95.93								Number of points
87.02		95.66								# of X values	31	54	87	126	148	191	212	232	232
70.86		83.87								# Y values analyzed	31	23	33	39	22	43	21	20	232
88.27		101.56
75.83		91.11
85.78		95.66
78.32		90.84
85.78		97.27
83.29		102.36
84.54		123.53
47.53			72.6
50.84			73.36
37.58			40.29
53.05			74.5
45.32			45.61
44.21			49.79
55.26			63.1
48.63			61.58
51.95			81.34
49.74			43.71
48.63			60.82
48.63			59.3
58.58			73.36
49.74			57.4
85.11			115.93
87.32			98.83
75.16			76.78
79.58			98.07
76.26			93.13
72.95			88.18
82.9			100.73
82.9			95.41
71.84			84.38
79.58			106.05
68.53			88.94
81.79			99.21
72.95			101.87
82.9			99.59
66.32			88.56
85.11			93.51
84			110.23
80.68			104.91
74.05			95.41
45.47				42.62
51.86				60.88
39.89				51.35
41.49				24.35
39.89				34.68
43.88				48.17
55.05				67.23
40.69				26.2
39.09				24.62
39.89				30.18
48.67				40.5
31.91				33.35
56.64				54.53
45.47				44.47
58.24				56.65
82.97				85.23
72.6				84.7
74.99				85.5
73.4				88.94
63.03				87.09
85.36				101.11
55.85				59.56
76.59				93.17
63.82				73.85
79.78				103.23
77.39				96.35
66.22				93.44
71				92.11
76.59				83.11
72.6				67.76
74.19				99.26
74.19				89.73
75.79				95.03
66.22				100.32
67.01				93.97
63.82				89.2
81.37				98.73
77.39				109.58
72.6				86.82
52.56					45.6
51.25					96.14
40.74					65.33
49.93					43.14
48.62					45.19
40.74					47.25
53.88					80.94
39.42					57.11
57.82					75.19
51.25					66.97
59.13					110.11
23.65					37.8
63.07					82.17
55.19					63.68
80.16					104.77
77.53					109.7
88.04					101.89
74.9					111.75
73.59					104.77
84.1					119.97
61.76					83.4
69.64					99.43
37.73						46.81
31.59						36.94
38.61						45.53
41.24						42.09
43						50.25
57.92						74.73
36.86						42.52
49.14						59.27
65.82						87.19
60.55						72.58
68.45						85.47
74.59						85.9
69.33						85.9
59.67						81.17
70.2						88.9
69.33						86.76
67.57						87.62
57.04						68.29
78.1						89.76
63.18						84.18
36.86						49.82
49.14						70.87
35.1						52.4
47.39						56.26
36.86						46.38
33.35						38.22
49.14						73.87
55.28						90.19
49.14						72.58
36.86						46.38
45.63						52.4
53.53						71.3
78.98						107.37
39.49						53.26
43						63.99
36.86						55.4
40.37						57.12
56.16						76.02
58.79						94.06
35.98						51.11
37.73						54.12
35.98						49.39
44.75						51.54
85.82							118.83
76.43							88.87
93.86							100.23
69.73							102.3
83.13							114.7
85.82							117.8
77.77							105.92
72.41							94.55
32.18							19.63
36.2							60.45
32.18							53.22
38.89							56.83
29.5							43.92
30.84							37.72
29.5							39.27
42.91							39.78
25.48							47.02
34.86							37.72
52.29							86.8
28.16							38.23
33.52							33.07
82.47								102.47
71.47								102.8
76.97								114.26
70.1								83.48
72.85								106.73
76.97								92.32
79.72								88.39
72.85								127.35
71.47								66.13
74.22								78.9
78.34								78.24
71.47								104.11
34.36								42.56
24.74								45.18
31.61								36.01
28.86								26.85
28.86								22.59
30.24								33.72
28.86								19.97
46.73								55
Insp amplitude (%)	Exp duration (%)
	20160513a	20160513b	20160511a	20160511b	20160506b	20160510a	20160623a	20160623b		Insp amplitude vs exp duration												Correlation analysis Insp amplitude vs exp duration
57.92	57.12										20160513a	20160513b	20160511a	20160511b	20160506b	20160510a	20160623a	20160623b	All values	Global (shared)			PNA burst amplitude %vs.20160513a	PNA burst amplitude %vs.20160513b	PNA burst amplitude %vs.20160511a	PNA burst amplitude %vs.20160511b	PNA burst amplitude %vs.20160506b	PNA burst amplitude %vs.20160510a	PNA burst amplitude %vs.20160623a	PNA burst amplitude %vs.20160623b	PNA burst amplitude %vs.All values
59.73	37.75									Comparison of Fits												Pearson r
57.92	45.2									Null hypothesis										One curve for all data sets		r	0.9316	0.7916	0.8381	0.92	0.9151	0.9101	0.9084	0.8551	0.7809
57.92	28.81									Alternative hypothesis										Different curve for each data set		95% confidence interval	0.8616 to 0.9668	0.5631 to 0.9076	0.6947 to 0.9174	0.8504 to 0.9579	0.8034 to 0.9645	0.8392 to 0.9506	0.7842 to 0.9626	0.6637 to 0.9414	0.7249 to 0.8267
57.92	42.22									P value										<0.0001		R squared	0.8678	0.6266	0.7024	0.8464	0.8373	0.8284	0.8251	0.7312	0.6098
56.12	37.75									Conclusion (alpha = 0.05)										Reject null hypothesis
57.92	33.78									Preferred model										Different curve for each data set		P value
50.7	30.3									F (DFn, DFd)										10.07 (16, 444)		P (two-tailed)	<0.0001	<0.0001	<0.0001	<0.0001	<0.0001	<0.0001	<0.0001	<0.0001	<0.0001
63.37	52.16																					P value summary	****	****	****	****	****	****	****	****	****
25.34	22.35									Different curve for each data set												Significant? (alpha = 0.05)	Yes	Yes	Yes	Yes	Yes	Yes	Yes	Yes	Yes
57.92	30.3									Best-fit values
72.42	49.18									YIntercept	-30.54	32.46	0.0891	-32.03	-1.538	-34.61	-182.2	-90.85	-17.72			Number of XY Pairs	31	23	33	38	22	43	21	20	231
25.66	25.33									Slope	1.333	0.6165	0.9755	1.185	1.059	1.147	2.911	1.867	1.088
86.9	87.92									Std. Error
86.9	84.94									YIntercept	7.438	8.981	9.752	7.52	8.331	7.245	26.65	23.53	4.923
92.32	107.29									Slope	0.09662	0.1039	0.114	0.08411	0.1044	0.08155	0.3074	0.2668	0.0575
92.32	89.41									95% CI (asymptotic)
83.28	80.97									YIntercept	-45.75 to -15.33	13.78 to 51.13	-19.8 to 19.98	-47.29 to -16.78	-18.92 to 15.84	-49.25 to -19.98	-237.9 to -126.4	-140.3 to -41.42	-27.42 to -8.016
101.37	102.82									Slope	1.135 to 1.531	0.4005 to 0.8326	0.7429 to 1.208	1.014 to 1.355	0.8415 to 1.277	0.9824 to 1.312	2.267 to 3.554	1.306 to 2.427	0.9745 to 1.201
79.65	58.61									Goodness of Fit
85.09	98.85									Degrees of Freedom	29	21	31	36	20	41	19	18	229
94.12	97.85									R square	0.8678	0.6266	0.7024	0.8464	0.8373	0.8284	0.8251	0.7312	0.6098
88.7	92.39									Absolute Sum of Squares	3488	1933	4144	3934	2368	2430	3797	5836	59742
77.84	77.49									Sy.x	10.97	9.595	11.56	10.45	10.88	7.698	14.14	18.01	16.15
72.42	65.07
77.84	72.52									One curve for all data sets
83.28	90.9									Best-fit values
101.37	102.82									YIntercept	-17.72	-17.72	-17.72	-17.72	-17.72	-17.72	-17.72	-17.72	-17.72	-17.72
94.12	111.26									Slope	1.088	1.088	1.088	1.088	1.088	1.088	1.088	1.088	1.088	1.088
95.95	91.4									Std. Error
106.81	116.23									YIntercept	3.474	3.474	3.474	3.474	3.474	3.474	3.474	3.474	3.474	3.474
84.86		73.4								Slope	0.04057	0.04057	0.04057	0.04057	0.04057	0.04057	0.04057	0.04057	0.04057	0.04057
53.73		69.07								95% CI (asymptotic)
57.2		68.87								YIntercept	-24.54 to -10.89	-24.54 to -10.89	-24.54 to -10.89	-24.54 to -10.89	-24.54 to -10.89	-24.54 to -10.89	-24.54 to -10.89	-24.54 to -10.89	-24.54 to -10.89	-24.54 to -10.89
86.59		88.16								Slope	1.008 to 1.167	1.008 to 1.167	1.008 to 1.167	1.008 to 1.167	1.008 to 1.167	1.008 to 1.167	1.008 to 1.167	1.008 to 1.167	1.008 to 1.167	1.008 to 1.167
53.73		65.11								Goodness of Fit
70.95		75.03								Degrees of Freedom										460
53.73		63.24								R square	0.8042	-0.225	0.5253	0.7893	0.5408	0.4105	0.4469	0.5766	0.6098	0.6098
48.51		62.43								Absolute Sum of Squares	5164	6342	6610	5395	6685	8345	12007	9194	59742	119484
58.94		65.11								Sy.x										16.12
100.5		81.19								Constraints
102.24		82.26								YIntercept	YIntercept is shared	YIntercept is shared	YIntercept is shared	YIntercept is shared	YIntercept is shared	YIntercept is shared	YIntercept is shared	YIntercept is shared	YIntercept is shared
91.81		85.21								Slope	Slope is shared	Slope is shared	Slope is shared	Slope is shared	Slope is shared	Slope is shared	Slope is shared	Slope is shared	Slope is shared
95.28		84.94
98.76		95.93								Number of points
107.45		95.66								# of X values	31	54	87	125	147	190	211	231	231
93.55		83.87								# Y values analyzed	31	23	33	38	22	43	21	20	231
100.5		101.56
103.98		91.11
97.02		95.66
95.28		90.84
90.07		97.27
98.76		102.36
95.28		123.53
69.64			72.6
69.64			73.36
39.31			40.29
69.64			74.5
54.54			45.61
53.04			49.79
72.63			63.1
84.74			61.58
74.13			81.34
59.03			43.71
53.04			60.82
63.52			59.3
80.24			73.36
80.24			57.4
96.84			115.93
102.96			98.83
107.45			76.78
99.96			98.07
99.96			93.13
96.84			88.18
93.85			100.73
101.46			95.41
87.86			84.38
93.85			106.05
87.86			88.94
95.35			99.21
98.34			101.87
93.85			99.59
102.96			88.56
98.34			93.51
87.86			110.23
95.35			104.91
96.84			95.41
66.83				42.62
66.83				60.88
56.08				51.35
56.08				24.35
62.49				34.68
58.25				48.17
84.07				67.23
59.39				26.2
53.91				24.62
53.91				30.18
66.83				40.5
49.58				33.35
81.9				54.53
64.66				44.47
92.65				56.65
103.49				85.23
94.82				84.7
94.82				85.5
92.65				88.94
96.98				87.09
107.83				101.11
90.58				59.56
107.83				93.17
96.98				73.85
112.06				103.23
99.15				96.35
94.82				93.44
99.15				92.11
99.15				83.11
107.83				67.76
109.89				99.26
101.32				89.73
96.98				95.03
96.98				100.32
101.32				89.2
116.4				98.73
112.06				109.58
103.49				86.82
58.17					45.6
78.86					96.14
53.13					65.33
56.49					43.14
53.13					45.19
49.59					47.25
82.21					80.94
41.2					57.11
80.54					75.19
71.96					66.97
97.69					110.11
27.4					37.8
89.11					82.17
77.18					63.68
102.91					104.77
109.62					109.7
102.91					101.89
97.69					111.75
90.79					104.77
104.59					119.97
78.86					83.4
82.21					99.43
74.33						46.81
65.05						36.94
76.98						45.53
75.67						42.09
83.62						50.25
99.56						74.73
69.03						42.52
96.91						59.27
103.55						87.19
99.56						72.58
102.21						85.47
103.55						85.9
112.83						85.9
92.92						81.17
107.51						88.9
106.2						86.76
114.15						87.62
90.27						68.29
112.83						89.76
106.2						84.18
73.02						49.82
87.61						70.87
67.7						52.4
74.33						56.26
73.02						46.38
62.39						38.22
95.58						73.87
88.94						90.19
83.62						72.58
75.67						46.38
82.3						52.4
86.29						71.3
108.85						107.37
82.3						53.26
82.3						63.99
78.32						55.4
78.32						57.12
92.92						76.02
102.21						94.06
74.33						51.11
76.98						54.12
74.33						49.39
75.67						51.54
98.49							118.83
98.49							88.87
96.04							100.23
98.49							102.3
99.71							114.7
94.81							117.8
99.71							105.92
90.72							94.55
67.43							19.63
77.24							60.45
85.82							53.22
78.46							56.83
78.46							43.92
82.14							37.72
77.24							39.27
78.46							39.78
72.33							47.02
76.01							37.72
93.58							86.8
79.69							38.23
84.59							33.07
103.15								102.47
101.34								102.8
94.08								114.26
105.82								83.48
96.76								106.73
95.9								92.32
100.38								88.39
97.71								127.35
104.01								66.13
94.94								78.9
89.5								78.24
94.08								104.11
78.72								42.56
65.17								45.18
78.72								36.01
63.36								26.85
65.17								22.59
70.52								33.72
57.92								19.97
80.53								55

## Sheet: Fig 7D and S1A
PNA AUC control	PNA AUC early I	PNA AUC early I post-stim	PNA AUC late I	PNA AUC late I post-stim	PNA AUC early post I	PNA AUC early post I post-stim		PNA AUC early I							PNA AUC late I							PNA AUC early post I
4.2623	1.3281	4.0504	3.5321	3.9425	3.7961	3.9716		One Way Repeated Measures Analysis of Variance							One Way Repeated Measures Analysis of Variance							One Way Repeated Measures Analysis of Variance
5.2863	1.5235	5.3455	4.5859	5.6494	5.8328	5.8383
3.1301	0.6216	3.4227	2.4824	3.254	3.0269	3.2277
2.6184	0.6753	2.4442	2.264	2.4596	2.4425	2.5137
9.1347	1.8169	8.0133	8.1378	9.1628	9.2388	9.405		Normality Test (Shapiro-Wilk)	Passed	(P = 0.115)					Normality Test (Shapiro-Wilk)	Passed	(P = 0.750)					Normality Test (Shapiro-Wilk)	Passed	(P = 0.400)
4.9222	1.1096	5.1798	4.3257	5.0247	4.8726	4.7986
2.3906	0.6354	2.5901	2.0017	2.303	2.0277	1.9888		Equal Variance Test:	Passed	(P = 0.368)					Equal Variance Test:	Passed	(P = 0.127)					Equal Variance Test:	Passed	(P = 0.352)
								Treatment Name	N	Missing	Mean	Std Dev	SEM		Treatment Name	N	Missing	Mean	Std Dev	SEM		Treatment Name	N	Missing	Mean	Std Dev	SEM
								PNA AUC control	7	0	4.535	2.316	0.875		PNA AUC control	7	0	4.535	2.316	0.875		PNA AUC control	7	0	4.535	2.316	0.875
								PNA AUC early I	7	0	1.101	0.478	0.181		PNA AUC late I	7	0	3.904	2.123	0.802		PNA AUC post I	7	0	4.462	2.496	0.943
								PNA AUC early I post stim	7	0	4.435	1.946	0.736		PNA AUC late I post stim	7	0	4.542	2.387	0.902		PNA AUC post I post stim	7	0	4.535	2.519	0.952
								Source of Variation	DF	SS	MS	F	P		Source of Variation	DF	SS	MS	F	P		Source of Variation	DF	SS	MS	F	P
								Between Subjects	6	43.981	7.33				Between Subjects	6	92.976	15.496				Between Subjects	6	107.178	17.863
								Between Treatments	2	53.461	26.73	26.06	<0.001		Between Treatments	2	1.878	0.939	26.176	<0.001		Between Treatments	2	0.0244	0.0122	0.314	0.736
								Residual	12	12.309	1.026				Residual	12	0.431	0.0359				Residual	12	0.466	0.0389
								Total	20	109.751					Total	20	95.285					Total	20	107.668
								The differences in the mean values among the treatment groups are greater than would be expected by chance; there is a statistically significant difference (P = <0.001). To isolate the group or groups that differ from the others use a multiple comparison procedure.							The differences in the mean values among the treatment groups are greater than would be expected by chance; there is a statistically significant difference (P = <0.001). To isolate the group or groups that differ from the others use a multiple comparison procedure.							The differences in the mean values among the treatment groups are not great enough to exclude the possibility that the difference is due to random sampling variability; there is not a statistically significant difference (P = 0.736).
								Power of performed test with alpha = 0.050: 1.000							Power of performed test with alpha = 0.050: 1.000							Power of performed test with alpha = 0.050: 0.049
																						The power of the performed test (0.049) is below the desired power of 0.800.
								All Pairwise Multiple Comparison Procedures (Holm-Sidak method):							All Pairwise Multiple Comparison Procedures (Holm-Sidak method):							Less than desired power indicates you are less likely to detect a difference when one actually exists. Negative results should be interpreted cautiously.
								Overall significance level = 0.05							Overall significance level = 0.05
								Comparisons for factor:							Comparisons for factor:
								Comparison	Diff of Means	t	P	P<0.050			Comparison	Diff of Means	t	P	P<0.050
								PNA AUC cont vs. PNA AUC earl	3.433	6.342	<0.001	Yes			PNA AUC late vs. PNA AUC late	0.638	6.302	<0.001	Yes
								PNA AUC earl vs. PNA AUC earl	3.334	6.158	<0.001	Yes			PNA AUC cont vs. PNA AUC late	0.631	6.229	<0.001	Yes
								PNA AUC cont vs. PNA AUC earl	0.0998	0.184	0.857	No			PNA AUC late vs. PNA AUC cont	0.00737	0.0728	0.943	No
RespSNA AUC control	RespSNA AUC early I	RespSNA AUC early I post-stim	RespSNA AUC late I	RespSNA AUC late I post-stim	RespSNA AUC early post I	RespSNA AUC early post I post-stim		RespSNA early I							RespSNA late I							RespSNA early post I
1.3551	0.4526	1.4244	1.2518	1.3952	1.5448	1.2958		One Way Repeated Measures Analysis of Variance							One Way Repeated Measures Analysis of Variance							One Way Repeated Measures Analysis of Variance
0.5988	-0.0199	0.6733	0.5294	0.6997	0.6737	0.7841
3.852	0.2687	3.5893	2.618	3.8008	4.1525	4.2275
1.7291	0.5389	1.6094	1.2872	1.6523	1.4782	1.2464
1.1418	0.1003	1.5655	1.0494	1.3657	1.2924	1.0946		Normality Test (Shapiro-Wilk)	Failed	(P < 0.050)					Normality Test (Shapiro-Wilk)	Failed	(P < 0.050)					Normality Test (Shapiro-Wilk)	Passed	(P = 0.782)
0.4259	0.1317	0.4324	0.3887	0.4171	0.4368	0.4995
0.3465	-0.0891	0.4365	0.1457	0.2894	0.2306	0.2835																Equal Variance Test:	Passed	(P = 0.574)
								Test execution ended by user request, RM ANOVA on Ranks begun							Test execution ended by user request, RM ANOVA on Ranks begun
																						Treatment Name	N	Missing	Mean	Std Dev	SEM
								Friedman Repeated Measures Analysis of Variance on Ranks							Friedman Repeated Measures Analysis of Variance on Ranks							RespSNA AUC control	7	0	1.35	1.216	0.46
																						RespSNA AUC post I	7	0	1.401	1.319	0.499
																						RespSNA AUC post I post stim	7	0	1.347	1.325	0.501
								Group	N	Missing	Median	0.25	0.75		Group	N	Missing	Median	0.25	0.75		Source of Variation	DF	SS	MS	F	P
								RespSNA AUC control	7	0	1.142	0.426	1.729		RespSNA AUC control	7	0	1.142	0.426	1.729		Between Subjects	6	29.585	4.931
								RespSNA AUC early I	7	0	0.132	-0.0199	0.453		RespSNA AUC late I	7	0	1.049	0.389	1.287		Between Treatments	2	0.013	0.00648	0.293	0.751
								RespSNA AUC early I post stim	7	0	1.424	0.437	1.609		RespSNA AUC late I post stim	7	0	1.366	0.417	1.652		Residual	12	0.265	0.0221
																						Total	20	29.863
								Chi-square= 11.143 with 2 degrees of freedom. P(est.)= 0.004 P(exact)= 0.001							Chi-square= 10.571 with 2 degrees of freedom. P(est.)= 0.005 P(exact)= 0.003							The differences in the mean values among the treatment groups are not great enough to exclude the possibility that the difference is due to random sampling variability; there is not a statistically significant difference (P = 0.751).
								The differences in the median values among the treatment groups are greater than would be expected by chance; there is a statistically significant difference (P = 0.001)							The differences in the median values among the treatment groups are greater than would be expected by chance; there is a statistically significant difference (P = 0.003)							Power of performed test with alpha = 0.050: 0.049
								To isolate the group or groups that differ from the others use a multiple comparison procedure.							To isolate the group or groups that differ from the others use a multiple comparison procedure.							The power of the performed test (0.049) is below the desired power of 0.800.
																						Less than desired power indicates you are less likely to detect a difference when one actually exists. Negative results should be interpreted cautiously.
								All Pairwise Multiple Comparison Procedures (Tukey Test):							All Pairwise Multiple Comparison Procedures (Tukey Test):
								Comparison	Diff of Ranks	q	P<0.05				Comparison	Diff of Ranks	q	P<0.05
								RespSNA AUC e vs RespSNA AUC e	12	4.536	Yes				RespSNA AUC c vs RespSNA AUC l	11	4.158	Yes
								RespSNA AUC e vs RespSNA AUC c	3	1.134	No				RespSNA AUC c vs RespSNA AUC l	1	0.378	No
								RespSNA AUC c vs RespSNA AUC e	9	3.402	Yes				RespSNA AUC l vs RespSNA AUC l	10	3.78	Yes
								Note: The multiple comparisons on ranks do not include an adjustment for ties.							Note: The multiple comparisons on ranks do not include an adjustment for ties.
Traube-Hering waves control	Traube-Hering waves early I	Traube-Hering waves early I post-stim	Traube-Hering waves late I	Traube-Hering waves late I post-stim	Traube-Hering waves early post I	Traube-Hering waves early post I post-stim		Traube-Hering waves early I							Traube-Hering waves late I							Traube-Hering waves early post I
0.8121	0.1542	0.9409	0.7984	0.8202	0.9826	0.8415		One Way Repeated Measures Analysis of Variance							One Way Repeated Measures Analysis of Variance							One Way Repeated Measures Analysis of Variance
0.3473	0.1159	0.4387	0.2956	0.4671	0.4504	0.4308
0.5694	0.0504	0.562	0.5222	0.5153	0.6077	0.4596
0.6107	0.2556	0.7715	0.5954	0.6457	0.7125	0.5113
0.5223	0.1143	0.6321	0.4633	0.7747	0.5724	0.5546		Normality Test (Shapiro-Wilk)	Passed	(P = 0.900)					Normality Test (Shapiro-Wilk)	Passed	(P = 0.597)					Normality Test (Shapiro-Wilk)	Passed	(P = 0.421)
0.1387	0.1189	0.1606	0.1606	0.0822	0.2105	0.0841
								Equal Variance Test:	Passed	(P = 0.502)					Equal Variance Test:	Passed	(P = 0.342)					Equal Variance Test:	Passed	(P = 0.446)
								Treatment Name	N	Missing	Mean	Std Dev	SEM		Treatment Name	N	Missing	Mean	Std Dev	SEM		Treatment Name	N	Missing	Mean	Std Dev	SEM
								TH waves control	6	0	0.5	0.232	0.0947		TH waves control	6	0	0.5	0.232	0.0947		TH waves control	6	0	0.5	0.232	0.0947
								TH waves early I	6	0	0.135	0.068	0.0278		TH waves late I	6	0	0.473	0.225	0.0917		TH waves post I	6	0	0.589	0.258	0.105
								TH waves early I post stim	6	0	0.584	0.27	0.11		TH waves late I post stim	6	0	0.551	0.268	0.109		TH waves post I post stim	6	0	0.48	0.244	0.0995
								Source of Variation	DF	SS	MS	F	P		Source of Variation	DF	SS	MS	F	P		Source of Variation	DF	SS	MS	F	P
								Between Subjects	5	0.465	0.093				Between Subjects	5	0.823	0.165				Between Subjects	5	0.875	0.175
								Between Treatments	2	0.685	0.342	17.767	<0.001		Between Treatments	2	0.0189	0.00946	1.636	0.243		Between Treatments	2	0.0405	0.0203	8.62	0.007
								Residual	10	0.193	0.0193				Residual	10	0.0578	0.00578				Residual	10	0.0235	0.00235
								Total	17	1.343					Total	17	0.9					Total	17	0.939
								The differences in the mean values among the treatment groups are greater than would be expected by chance; there is a statistically significant difference (P = <0.001). To isolate the group or groups that differ from the others use a multiple comparison procedure.							The differences in the mean values among the treatment groups are not great enough to exclude the possibility that the difference is due to random sampling variability; there is not a statistically significant difference (P = 0.243).							The differences in the mean values among the treatment groups are greater than would be expected by chance; there is a statistically significant difference (P = 0.007). To isolate the group or groups that differ from the others use a multiple comparison procedure.
								Power of performed test with alpha = 0.050: 0.997							Power of performed test with alpha = 0.050: 0.125							Power of performed test with alpha = 0.050: 0.862
															The power of the performed test (0.125) is below the desired power of 0.800.
								All Pairwise Multiple Comparison Procedures (Holm-Sidak method):							Less than desired power indicates you are less likely to detect a difference when one actually exists. Negative results should be interpreted cautiously.							All Pairwise Multiple Comparison Procedures (Holm-Sidak method):
								Overall significance level = 0.05														Overall significance level = 0.05
								Comparisons for factor:														Comparisons for factor:
								Comparison	Diff of Means	t	P	P<0.050										Comparison	Diff of Means	t	P	P<0.050
								TH waves ear vs. TH waves ear	0.449	5.607	<0.001	Yes										TH waves pos vs. TH waves pos	0.109	3.897	0.009	Yes
								TH waves con vs. TH waves ear	0.365	4.556	0.002	Yes										TH waves pos vs. TH waves con	0.0893	3.19	0.019	Yes
								TH waves ear vs. TH waves con	0.0842	1.051	0.318	No										TH waves con vs. TH waves pos	0.0198	0.706	0.496	No
RSA control	RSA early I	RSA early I post-stim	RSA late I	RSA late I post-stim	RSA early post I	RSA early post I post-stim		RSA early I							RSA late I							RSA early post I
1.977	1.7732	0.9159	1.5347	1.8609	1.7185	2.0199		One Way Repeated Measures Analysis of Variance							One Way Repeated Measures Analysis of Variance							One Way Repeated Measures Analysis of Variance
1.985	1.261	0.449	1.4042	1.3766	1.68	2.3632
1.0214	1.0151	0.3943	0.8158	0.6946	1.0246	1.583
9.8583	10.2719	2.9366	9.8568	9.567	10.7359	11.2011
14.3686	19.0832	5.3528	12.9059	14.1733	13.6822	15.6166		Normality Test (Shapiro-Wilk)	Passed	(P = 0.225)					Normality Test (Shapiro-Wilk)	Passed	(P = 0.390)					Normality Test (Shapiro-Wilk)	Passed	(P = 0.541)
2.1196	1.7764	0.3913	1.5848	2.3809	2.3929	2.6774
1.411	1.5813	1.1677	1.4454	1.7372	1.3306	2.0711		Equal Variance Test:	Passed	(P = 0.532)					Equal Variance Test:	Passed	(P = 0.638)					Equal Variance Test:	Passed	(P = 0.892)
								Treatment Name	N	Missing	Mean	Std Dev	SEM		Treatment Name	N	Missing	Mean	Std Dev	SEM		Treatment Name	N	Missing	Mean	Std Dev	SEM
								RSA control	7	0	4.677	5.258	1.987		RSA control	7	0	4.677	5.258	1.987		RSA control	7	0	4.677	5.258	1.987
								RSA early I	7	0	5.252	6.929	2.619		RSA late I	7	0	4.221	4.976	1.881		RSA post I	7	0	4.652	5.249	1.984
								RSA early I post stim	7	0	1.658	1.859	0.703		RSA late I post stim	7	0	4.542	5.205	1.967		RSA post I post stim	7	0	5.362	5.653	2.137
								Source of Variation	DF	SS	MS	F	P		Source of Variation	DF	SS	MS	F	P		Source of Variation	DF	SS	MS	F	P
								Between Subjects	6	391.683	65.281				Between Subjects	6	475.692	79.282				Between Subjects	6	521.338	86.89
								Between Treatments	2	52.169	26.084	3.772	0.054		Between Treatments	2	0.768	0.384	3.443	0.066		Between Treatments	2	2.27	1.135	8.698	0.005
								Residual	12	82.975	6.915				Residual	12	1.339	0.112				Residual	12	1.566	0.13
								Total	20	526.827					Total	20	477.799					Total	20	525.173
								The differences in the mean values among the treatment groups are not great enough to exclude the possibility that the difference is due to random sampling variability; there is not a statistically significant difference (P = 0.054).							The differences in the mean values among the treatment groups are not great enough to exclude the possibility that the difference is due to random sampling variability; there is not a statistically significant difference (P = 0.066).							The differences in the mean values among the treatment groups are greater than would be expected by chance; there is a statistically significant difference (P = 0.005). To isolate the group or groups that differ from the others use a multiple comparison procedure.
								Power of performed test with alpha = 0.050: 0.437							Power of performed test with alpha = 0.050: 0.389							Power of performed test with alpha = 0.050: 0.886
								The power of the performed test (0.437) is below the desired power of 0.800.							The power of the performed test (0.389) is below the desired power of 0.800.
								Less than desired power indicates you are less likely to detect a difference when one actually exists. Negative results should be interpreted cautiously.							Less than desired power indicates you are less likely to detect a difference when one actually exists. Negative results should be interpreted cautiously.							All Pairwise Multiple Comparison Procedures (Holm-Sidak method):
																						Overall significance level = 0.05
																						Comparisons for factor:
																						Comparison	Diff of Means	t	P	P<0.050
																						RSA post I p vs. RSA post I	0.71	3.675	0.009	Yes
																						RSA post I p vs. RSA control	0.684	3.545	0.008	Yes
																						RSA control vs. RSA post I	0.0252	0.13	0.898	No
