# Supplementary material for: PreBötzinger complex neurons drive respiratory modulation of blood pressure and heart rate
Source: eLife. 2020 Jun 15;9:e57288. doi: 10.7554/eLife.57288 (PMC7326498; doi:10.7554/eLife.57288)
Supplement: Figure 8—source data 1. [file elife-57288-fig8-data1.xlsx]

## Sheet: Fig8C
Resp freq before	Resp freq during	Resp freq after		Resp freq
7.964	10.9373	8.1866		One Way Repeated Measures Analysis of Variance
19.72	22.9926	22.6549
34.4775	42.4856	37.8026
11.3835	13.7313	11.4498
12.0108	24.3869	14.3354		Normality Test (Shapiro-Wilk)	Passed	(P = 0.702)
10.435	20.0715	11.8667
21.0438	26.1025	21.0335		Equal Variance Test:	Passed	(P = 0.310)
14.6108	19.3055	14.8234
				Treatment Name	N	Missing	Mean	Std Dev	SEM
				PNA freq before	8	0	16.456	8.567	3.029
				PNA freq during	8	0	22.502	9.583	3.388
				PNA freq after	8	0	17.769	9.433	3.335
				Source of Variation	DF	SS	MS	F	P
				Between Subjects	7	1721.69	245.955
				Between Treatments	2	161.802	80.901	19.571	<0.001
				Residual	14	57.873	4.134
				Total	23	1941.36
				The differences in the mean values among the treatment groups are greater than would be expected by chance; there is a statistically significant difference (P = <0.001). To isolate the group or groups that differ from the others use a multiple comparison procedure.
				Power of performed test with alpha = 0.050: 1.000
				All Pairwise Multiple Comparison Procedures (Holm-Sidak method):
				Overall significance level = 0.05
				Comparisons for factor:
				Comparison	Diff of Means	t	P	P<0.050
				PNA freq dur vs. PNA freq bef	6.046	5.947	<0.001	Yes
				PNA freq dur vs. PNA freq aft	4.733	4.655	<0.001	Yes
				PNA freq aft vs. PNA freq bef	1.313	1.292	0.217	No
Insp duration before	Insp duration during	Insp duration after		Insp duration
1.6565	1.2373	1.6836		One Way Repeated Measures Analysis of Variance
1.6676	1.6151	1.5635
1.0837	1.0972	1.0111
0.9108	0.828	0.971
1.217	1.3185	1.6531		Normality Test (Shapiro-Wilk)	Passed	(P = 0.240)
2.2623	1.7796	2.9439
1.4189	1.5085	1.6851		Equal Variance Test:	Passed	(P = 0.598)
1.2243	1.0772	1.2677
				Treatment Name	N	Missing	Mean	Std Dev	SEM
				ins duration before	8	0	1.43	0.427	0.151
				insp duration during	8	0	1.308	0.314	0.111
				Insp duration after	8	0	1.597	0.618	0.219
				Source of Variation	DF	SS	MS	F	P
				Between Subjects	7	3.993	0.57
				Between Treatments	2	0.338	0.169	3.633	0.054
				Residual	14	0.652	0.0466
				Total	23	4.983
				The differences in the mean values among the treatment groups are not great enough to exclude the possibility that the difference is due to random sampling variability; there is not a statistically significant difference (P = 0.054).
				Power of performed test with alpha = 0.050: 0.430
				The power of the performed test (0.430) is below the desired power of 0.800.
				Less than desired power indicates you are less likely to detect a difference when one actually exists. Negative results should be interpreted cautiously.
Insp amplitude before	Insp amplitude during	Insp amplitude after		Insp amplitude
1.6029	1.6705	1.7223		One Way Repeated Measures Analysis of Variance
17.0914	16.1829	16.2259
2.7458	1.7765	2.5778
4.0549	3.3592	3.7457
8.2724	5.2596	6.9039		Normality Test (Shapiro-Wilk)	Passed	(P = 0.707)
7.2552	4.7584	6.3947
7.2406	6.0714	6.6821		Equal Variance Test:	Passed	(P = 0.134)
5.8853	5.6564	6.127
				Treatment Name	N	Missing	Mean	Std Dev	SEM
				PNA amplitude before	8	0	6.769	4.785	1.692
				PNA amplitude during	8	0	5.592	4.6	1.626
				PNA amplitude after	8	0	6.297	4.479	1.583
				Source of Variation	DF	SS	MS	F	P
				Between Subjects	7	444.566	63.509
				Between Treatments	2	5.612	2.806	9.213	0.003
				Residual	14	4.264	0.305
				Total	23	454.441
				The differences in the mean values among the treatment groups are greater than would be expected by chance; there is a statistically significant difference (P = 0.003). To isolate the group or groups that differ from the others use a multiple comparison procedure.
				Power of performed test with alpha = 0.050: 0.919
				All Pairwise Multiple Comparison Procedures (Holm-Sidak method):
				Overall significance level = 0.05
				Comparisons for factor:
				Comparison	Diff of Means	t	P	P<0.050
				PNA amplitud vs. PNA amplitud	1.177	4.265	0.002	Yes
				PNA amplitud vs. PNA amplitud	0.706	2.557	0.045	Yes
				PNA amplitud vs. PNA amplitud	0.471	1.707	0.11	No

## Sheet: Fig 8D
Non-resp VNA before	Non-resp VNA during	Non-resp VNA after		Non-resp VNA
1.5385	1.5064	1.5161		One Way Repeated Measures Analysis of Variance
1.3494	1.3515	1.3478
2.4482	2.4818	2.4508
1.4545	1.4306	1.4955
2.41	2.2	2.44		Normality Test (Shapiro-Wilk)	Passed	(P = 0.396)
2.174	2.023	2.129
				Equal Variance Test:	Passed	(P = 0.534)
				Treatment Name	N	Missing	Mean	Std Dev	SEM
				Late-E VNA amplitude before	6	0	1.896	0.504	0.206
				Late-E VNA amplitude during	6	0	1.832	0.467	0.191
				Late-E VNA amplitude after	6	0	1.897	0.503	0.205
				Source of Variation	DF	SS	MS	F	P
				Between Subjects	5	3.59	0.718
				Between Treatments	2	0.0164	0.00818	2.459	0.135
				Residual	10	0.0333	0.00333
				Total	17	3.64
				The differences in the mean values among the treatment groups are not great enough to exclude the possibility that the difference is due to random sampling variability; there is not a statistically significant difference (P = 0.135).
				Power of performed test with alpha = 0.050: 0.235
				The power of the performed test (0.235) is below the desired power of 0.800.
				Less than desired power indicates you are less likely to detect a difference when one actually exists. Negative results should be interpreted cautiously.
Post-I VNA before	Post-I VNA during	Post-I VNA after		Post-I VNA
5.3276	4.4389	5.7776		One Way Repeated Measures Analysis of Variance
2.9056	2.7378	2.8917
4.0915	3.513	3.9925
2.3309	2.1665	2.3219
3.6365	3.5105	3.8732		Normality Test (Shapiro-Wilk)	Passed	(P = 0.696)
4.2401	2.9354	5.4725
				Equal Variance Test:	Passed	(P = 0.311)
				Treatment Name	N	Missing	Mean	Std Dev	SEM
				VNA peak post-I amplitude befo	6	0	3.755	1.057	0.431
				VNA peak post-I amplitude duri	6	0	3.217	0.785	0.32
				VNA peak post-I amplitude afte	6	0	4.055	1.369	0.559
				Source of Variation	DF	SS	MS	F	P
				Between Subjects	5	15.757	3.151
				Between Treatments	2	2.163	1.082	4.748	0.036
				Residual	10	2.278	0.228
				Total	17	20.198
				The differences in the mean values among the treatment groups are greater than would be expected by chance; there is a statistically significant difference (P = 0.036). To isolate the group or groups that differ from the others use a multiple comparison procedure.
				Power of performed test with alpha = 0.050: 0.543
				All Pairwise Multiple Comparison Procedures (Holm-Sidak method):
				Overall significance level = 0.05
				Comparisons for factor:
				Comparison	Diff of Means	t	P	P<0.050
				VNA peak pos vs. VNA peak pos	0.838	3.041	0.037	Yes
				VNA peak pos vs. VNA peak pos	0.538	1.954	0.152	No
				VNA peak pos vs. VNA peak pos	0.3	1.087	0.302	No

## Sheet: Fig 8E, 8F, 8G
HR before	HE during	HR after		HR
258.29	260.08	265.44		One Way Repeated Measures Analysis of Variance
315.047	312.161	320.005
257.407	248.566	261.495
327.166	327.29	329.873
306.07	310.23	311.27		Normality Test (Shapiro-Wilk)	Passed	(P = 0.754)
326.614	331.107	331.005
294.12	287.013	286.121		Equal Variance Test:	Passed	(P = 0.867)
329.527	340.852	326.47
256.711	263.359	270.645		Treatment Name	N	Missing	Mean	Std Dev	SEM
				HR before	9	0	296.772	31.524	10.508
				HR during	9	0	297.851	34.173	11.391
				HR after	9	0	300.258	29.181	9.727
				Source of Variation	DF	SS	MS	F	P
				Between Subjects	8	23732.5	2966.56
				Between Treatments	2	57.331	28.666	1.231	0.318
				Residual	16	372.543	23.284
				Total	26	24162.4
				The differences in the mean values among the treatment groups are not great enough to exclude the possibility that the difference is due to random sampling variability; there is not a statistically significant difference (P = 0.318).
				Power of performed test with alpha = 0.050: 0.078
				The power of the performed test (0.078) is below the desired power of 0.800.
				Less than desired power indicates you are less likely to detect a difference when one actually exists. Negative results should be interpreted cautiously.
SNA before	SNA during	SNA after		SNA
3.0214	3.2595	3.0268		One Way Repeated Measures Analysis of Variance
4.2361	4.2179	4.2895
4.7235	4.3974	4.8149
4.6075	4.5171	4.7369
8.1292	9.0334	8.6242		Normality Test (Shapiro-Wilk)	Passed	(P = 0.114)
9.1843	9.2387	9.0163
5.4974	5.5603	5.5309		Equal Variance Test:	Passed	(P = 0.505)
6.3713	6.5382	6.4027
				Treatment Name	N	Missing	Mean	Std Dev	SEM
				total SNA before	8	0	5.721	2.07	0.732
				total SNA during	8	0	5.845	2.25	0.795
				total SNA after	8	0	5.805	2.099	0.742
				Source of Variation	DF	SS	MS	F	P
				Between Subjects	7	95.708	13.673
				Between Treatments	2	0.064	0.032	0.813	0.463
				Residual	14	0.551	0.0394
				Total	23	96.323
				The differences in the mean values among the treatment groups are not great enough to exclude the possibility that the difference is due to random sampling variability; there is not a statistically significant difference (P = 0.463).
				Power of performed test with alpha = 0.050: 0.049
				The power of the performed test (0.049) is below the desired power of 0.800.
				Less than desired power indicates you are less likely to detect a difference when one actually exists. Negative results should be interpreted cautiously.
mean PP before	mean PP during	mean PP after		mean PP
78.3931	78.4663	78.6185		One Way Repeated Measures Analysis of Variance
86.0429	85.2171	86.1285
93.8361	92.767	93.6821
79.2469	77.2909	79.4403
70.5642	67.99	67.99		Normality Test (Shapiro-Wilk)	Passed	(P = 0.591)
84.6689	83.9956	84.3033
76.9004	76.3001	77.9681		Equal Variance Test:	Passed	(P = 0.627)
85.2493	84.3707	86.541
94.8248	94.1645	95.2784		Treatment Name	N	Missing	Mean	Std Dev	SEM
				Mean PP before	9	0	83.303	7.911	2.637
				Mean PP during	9	0	82.285	8.266	2.755
				Mean PP after	9	0	83.328	8.444	2.815
				Source of Variation	DF	SS	MS	F	P
				Between Subjects	8	1610.92	201.365
				Between Treatments	2	6.377	3.188	7.574	0.005
				Residual	16	6.736	0.421
				Total	26	1624.03
				The differences in the mean values among the treatment groups are greater than would be expected by chance; there is a statistically significant difference (P = 0.005). To isolate the group or groups that differ from the others use a multiple comparison procedure.
				Power of performed test with alpha = 0.050: 0.855
				All Pairwise Multiple Comparison Procedures (Holm-Sidak method):
				Overall significance level = 0.05
				Comparisons for factor:
				Comparison	Diff of Means	t	P	P<0.050
				Mean PP afte vs. Mean PP duri	1.043	3.41	0.011	Yes
				Mean PP befo vs. Mean PP duri	1.018	3.329	0.008	Yes
				Mean PP afte vs. Mean PP befo	0.0249	0.0813	0.936	No

## Sheet: Fig 8H
Traube-Hering waves before	Traube-Hering waves during	Traube-Hering waves after		Traube-Hering waves
3.9875	2.5721	4.478		One Way Repeated Measures Analysis of Variance
0.792	0.478	0.6418
0.4349	0.1176	0.3879
1.2991	0.8078	1.4101
1.9236	0.2329	0.8111		Normality Test (Shapiro-Wilk)	Passed	(P = 0.489)
1.2309	0.1326	0.6468
0.8535	0.3677	0.631		Equal Variance Test:	Passed	(P = 0.918)
1.3162	0.6835	1.4065
1.5503	1.0634	2.0753		Treatment Name	N	Missing	Mean	Std Dev	SEM
				Before TH wave	9	0	1.488	1.035	0.345
				During TH wave	9	0	0.717	0.765	0.255
				After TH wave	9	0	1.388	1.276	0.425
				Source of Variation	DF	SS	MS	F	P
				Between Subjects	8	24.151	3.019
				Between Treatments	2	3.158	1.579	11.826	<0.001
				Residual	16	2.136	0.134
				Total	26	29.445
				The differences in the mean values among the treatment groups are greater than would be expected by chance; there is a statistically significant difference (P = <0.001). To isolate the group or groups that differ from the others use a multiple comparison procedure.
				Power of performed test with alpha = 0.050: 0.979
				All Pairwise Multiple Comparison Procedures (Holm-Sidak method):
				Overall significance level = 0.05
				Comparisons for factor:
				Comparison	Diff of Means	t	P	P<0.050
				Before TH wa vs. During TH wa	0.77	4.472	0.001	Yes
				After TH wav vs. During TH wa	0.67	3.892	0.003	Yes
				Before TH wa vs. After TH wav	0.0999	0.58	0.57	No
RSA before	RSA during	RSA after		RSA
4.2664	3.7859	3.8483		One Way Repeated Measures Analysis of Variance
6.5552	1.2433	4.9445
4.6967	3.9509	2.9999
4.7231	1.1512	1.2273
0.872	0.5212	0.5604		Normality Test (Shapiro-Wilk)	Failed	(P < 0.050)
1.1122	0.1355	1.0436
6.9732	1.9154	9.9952
8.4765	5.5059	12.7699		Test execution ended by user request, RM ANOVA on Ranks begun
34.0769	4.6456	41.8429
				Friedman Repeated Measures Analysis of Variance on Ranks	samedi, avril 04, 2020, 20:07:16
				Data source: 20Hz stim RSA in Stats preBotzC ChR2 in situ
				Group	N	Missing	Median	0.25	0.75
				Before RSA	9	0	4.723	2.689	7.725
				During RSA	9	0	1.915	0.836	4.298
				After RSA	9	0	3.848	1.135	11.383
				Chi-square= 11.556 with 2 degrees of freedom. P(est.)= 0.003 P(exact)= 0.001
				The differences in the median values among the treatment groups are greater than would be expected by chance; there is a statistically significant difference (P = 0.001)
				To isolate the group or groups that differ from the others use a multiple comparison procedure.
				All Pairwise Multiple Comparison Procedures (Tukey Test):
				Comparison	Diff of Ranks	q	P<0.05
				Before RSA vs During RSA	14	4.667	Yes
				Before RSA vs After RSA	4	1.333	No
				After RSA vs During RSA	10	3.333	Yes
				Note: The multiple comparisons on ranks do not include an adjustment for ties.

## Sheet: Fig 8I and 8J
RespSNA duration before	RespSNA duration during	RespSNA duration after		RespSNA duration
1.616	1.2847	1.8796		One Way Repeated Measures Analysis of Variance
1.3837	1.4046	1.2969
0.8162	0.5458	0.8804
1.3671	0.8404	1.6474
2.764	1.2294	2.1511		Normality Test (Shapiro-Wilk)	Passed	(P = 0.110)
0.8614	0.5774	1.3347
1.6032	1.1587	1.8523		Equal Variance Test:	Passed	(P = 0.848)
0.8108	0.6555	0.7198
1.7477	1.1662	1.6376		Treatment Name	N	Missing	Mean	Std Dev	SEM
				Duration before	9	0	1.441	0.616	0.205
				Duration during	9	0	0.985	0.331	0.11
				Duration after	9	0	1.489	0.473	0.158
				Source of Variation	DF	SS	MS	F	P
				Between Subjects	8	4.579	0.572
				Between Treatments	2	1.394	0.697	9.914	0.002
				Residual	16	1.125	0.0703
				Total	26	7.098
				The differences in the mean values among the treatment groups are greater than would be expected by chance; there is a statistically significant difference (P = 0.002). To isolate the group or groups that differ from the others use a multiple comparison procedure.
				Power of performed test with alpha = 0.050: 0.947
				All Pairwise Multiple Comparison Procedures (Holm-Sidak method):
				Overall significance level = 0.05
				Comparisons for factor:
				Comparison	Diff of Means	t	P	P<0.050
				Duration aft vs. Duration dur	0.504	4.033	0.003	Yes
				Duration bef vs. Duration dur	0.456	3.651	0.004	Yes
				Duration aft vs. Duration bef	0.0478	0.382	0.707	No
RespSNA amplitude before	RespSNA amplitude during	RespSNA amplitude after		RespSNA amplitude
6.3174	6.6789	7.0248		One Way Repeated Measures Analysis of Variance
8.2184	6.9457	8.3213
6.9981	5.3031	6.8412
11.4973	9.9459	10.3562
14.8858	11.0123	11.9604		Normality Test (Shapiro-Wilk)	Passed	(P = 0.209)
12.9163	10.4835	11.1616
10.4035	8.0335	9.0115		Equal Variance Test:	Passed	(P = 0.222)
12.0944	11.6972	12.2228
15.6004	16.594	19.5916		Treatment Name	N	Missing	Mean	Std Dev	SEM
				Before peak level	9	0	10.992	3.306	1.102
				During peak level	9	0	9.633	3.404	1.135
				After peak level	9	0	10.721	3.876	1.292
				Source of Variation	DF	SS	MS	F	P
				Between Subjects	8	282.234	35.279
				Between Treatments	2	9.323	4.661	4.126	0.036
				Residual	16	18.077	1.13
				Total	26	309.633
				The differences in the mean values among the treatment groups are greater than would be expected by chance; there is a statistically significant difference (P = 0.036). To isolate the group or groups that differ from the others use a multiple comparison procedure.
				Power of performed test with alpha = 0.050: 0.512
				All Pairwise Multiple Comparison Procedures (Holm-Sidak method):
				Overall significance level = 0.05
				Comparisons for factor:
				Comparison	Diff of Means	t	P	P<0.050
				Before peak vs. During peak	1.36	2.714	0.045	Yes
				After peak l vs. During peak	1.089	2.173	0.088	No
				Before peak vs. After peak l	0.271	0.541	0.596	No
RespSNA AUC before	RespSNA AUC during	RespSNA AUC after		RespSNA AUC
2.076	1.6889	2.2346		One Way Repeated Measures Analysis of Variance
2.2447	1.744	2.1104
0.8838	0.2595	0.7452
3.4688	1.7786	3.4528
6.3853	1.7407	3.8594		Normality Test (Shapiro-Wilk)	Failed	(P < 0.050)
1.1529	0.2655	0.9308
3.3766	2.1092	3.2931
1.3817	0.8776	1.3111		Test execution ended by user request, RM ANOVA on Ranks begun
6.5515	4.2985	8.5578
				Friedman Repeated Measures Analysis of Variance on Ranks
				Group	N	Missing	Median	0.25	0.75
				Before AUC	9	0	2.245	1.267	4.927
				During AUC	9	0	1.741	0.572	1.944
				After AUC	9	0	2.235	1.121	3.656
				Chi-square= 14.889 with 2 degrees of freedom. P(est.)= <0.001 P(exact)= <0.001
				The differences in the median values among the treatment groups are greater than would be expected by chance; there is a statistically significant difference (P = <0.001)
				To isolate the group or groups that differ from the others use a multiple comparison procedure.
				All Pairwise Multiple Comparison Procedures (Tukey Test):
				Comparison	Diff of Ranks	q	P<0.05
				Before AUC vs During AUC	16	5.333	Yes
				Before AUC vs After AUC	5	1.667	No
				After AUC vs During AUC	11	3.667	Yes
				Note: The multiple comparisons on ranks do not include an adjustment for ties.
mean tonic SNA before	mean tonic SNA during	mean tonic SNA after		mean tonic SNA
2.913	2.958	3.037		One Way Repeated Measures Analysis of Variance
3.3728	3.5051	3.4644
4.1809	4.2127	4.1154
3.823	4.1449	3.9797
7.0092	8.1477	7.754		Normality Test (Shapiro-Wilk)	Passed	(P = 0.135)
8.9198	9.1123	8.8379
4.2249	4.5863	4.1663		Equal Variance Test:	Passed	(P = 0.810)
6.1937	6.3682	6.0629
6.8126	7.8806	6.4641		Treatment Name	N	Missing	Mean	Std Dev	SEM
				Before mean tonic SNA	9	0	5.272	2.034	0.678
				During mean tonic SNA	9	0	5.657	2.265	0.755
				After mean tonic SNA	9	0	5.32	2.043	0.681
				Source of Variation	DF	SS	MS	F	P
				Between Subjects	8	106.298	13.287
				Between Treatments	2	0.793	0.396	5.16	0.019
				Residual	16	1.229	0.0768
				Total	26	108.32
				The differences in the mean values among the treatment groups are greater than would be expected by chance; there is a statistically significant difference (P = 0.019). To isolate the group or groups that differ from the others use a multiple comparison procedure.
				Power of performed test with alpha = 0.050: 0.646
				All Pairwise Multiple Comparison Procedures (Holm-Sidak method):
				Overall significance level = 0.05
				Comparisons for factor:
				Comparison	Diff of Means	t	P	P<0.050
				During mean vs. Before mean	0.385	2.947	0.028	Yes
				During mean vs. After mean t	0.337	2.58	0.04	Yes
				After mean t vs. Before mean	0.048	0.367	0.718	No
RespSNA beginning before	RespSNA beginning during	RespSNA beginning after		RespSNA beginning
-1.2414	-0.998	-1.3563		One Way Repeated Measures Analysis of Variance
-1.038	-0.9598	-0.8715
-0.6028	-0.3285	-0.5364
-0.5089	-0.4787	-0.5164
-1.2966	-0.9303	-1.4334		Normality Test (Shapiro-Wilk)	Passed	(P = 0.823)
-0.2042	-0.0811	-0.4219
-0.8909	-0.5415	-1.0567		Equal Variance Test:	Failed	(P < 0.050)
-0.5504	-0.386	-0.4378
-1.2379	-0.8536	-1.1865
				Test execution ended by user request, RM ANOVA on Ranks begun
				Friedman Repeated Measures Analysis of Variance on Ranks	mercredi, janvier 16, 2019, 11:10:56
				Data source: 20Hz stim RespSNA in Stats preBotzC ChR2 in situ
				Group	N	Missing	Median	0.25	0.75
				Before time beginning	9	0	-0.891	-1.24	-0.53
				During time beginning	9	0	-0.542	-0.945	-0.357
				After time beginning	9	0	-0.872	-1.271	-0.477
				Chi-square= 10.667 with 2 degrees of freedom. P(est.)= 0.005 P(exact)= 0.004
				The differences in the median values among the treatment groups are greater than would be expected by chance; there is a statistically significant difference (P = 0.004)
				To isolate the group or groups that differ from the others use a multiple comparison procedure.
				All Pairwise Multiple Comparison Procedures (Tukey Test):
				Comparison	Diff of Ranks	q	P<0.05
				During time b vs After time be	12	4	Yes
				During time b vs Before time b	12	4	Yes
				Before time b vs After time be	0	0	No
				Note: The multiple comparisons on ranks do not include an adjustment for ties.
RespSNA peak before	RespSNA peak during	RespSNA peak after		RespSNA peak
-0.0379	0.023	-0.0108		One Way Repeated Measures Analysis of Variance
0.0539	0.076	0.0543
0.0512	0.051	0.0537
0.0329	0.0372	0.0579
0.0921	-0.0924	-0.087		Normality Test (Shapiro-Wilk)	Failed	(P < 0.050)
0.1082	0.0798	0.0987
0.1117	0.0908	0.0994
0.0539	0.0614	0.0227		Test execution ended by user request, RM ANOVA on Ranks begun
-0.034	-0.0223	0.0264
				Friedman Repeated Measures Analysis of Variance on Ranks	mercredi, janvier 16, 2019, 11:11:47
				Data source: 20Hz stim RespSNA in Stats preBotzC ChR2 in situ
				Group	N	Missing	Median	0.25	0.75
				Before time peak	9	0	0.0539	-0.000567	0.1
				During time peak	9	0	0.051	0.00036	0.0779
				After time peak	9	0	0.0537	0.00593	0.0783
				Chi-square= 0.667 with 2 degrees of freedom. P(est.)= 0.717 P(exact)= 0.814
				The differences in the median values among the treatment groups are not great enough to exclude the possibility that the difference is due to random sampling variability; there is not a statistically significant difference (P = 0.814)
RespSNA end before	RespSNA end during	RespSNA end after		RespSNA end
0.3949	0.2461	0.5098		One Way Repeated Measures Analysis of Variance
0.3457	0.3182	0.4294
0.2185	0.2213	0.3439
0.8582	0.3617	1.131
1.4674	0.2991	0.7177		Normality Test (Shapiro-Wilk)	Failed	(P < 0.050)
0.6572	0.4963	0.9128
0.7123	0.6172	0.7956
0.2604	0.2695	0.282		Test execution ended by user request, RM ANOVA on Ranks begun
0.5098	0.3126	0.4512
				Friedman Repeated Measures Analysis of Variance on Ranks	mercredi, janvier 16, 2019, 11:12:18
				Data source: 20Hz stim RespSNA in Stats preBotzC ChR2 in situ
				Group	N	Missing	Median	0.25	0.75
				Before time end	9	0	0.51	0.303	0.785
				During time end	9	0	0.313	0.258	0.429
				After time end	9	0	0.51	0.387	0.854
				Chi-square= 10.889 with 2 degrees of freedom. P(est.)= 0.004 P(exact)= 0.003
				The differences in the median values among the treatment groups are greater than would be expected by chance; there is a statistically significant difference (P = 0.003)
				To isolate the group or groups that differ from the others use a multiple comparison procedure.
				All Pairwise Multiple Comparison Procedures (Tukey Test):
				Comparison	Diff of Ranks	q	P<0.05
				After time en vs During time e	14	4.667	Yes
				After time en vs Before time e	7	2.333	No
				Before time e vs During time e	7	2.333	No
				Note: The multiple comparisons on ranks do not include an adjustment for ties.

## Sheet: Fig 8K
Delta PNA amplitude (%)	Delta RespSNA AUC (%)		Linear regression analysis			Correlation analysis
4.22	-18.65		Best-fit values ± SE			Pearson r
-5.32	-22.31		Slope	1.406 ± 0.1502		r	0.9674
-35.3	-70.63		Y-intercept	-22.63 ± 3.513		95% confidence interval	0.8254 to 0.9943
-17.16	-48.73		X-intercept	16.1		R squared	0.9359
-36.42	-72.74		1/slope	0.7114
-34.41	-76.97					P value
-16.15	-37.53		95% Confidence Intervals			P (two-tailed)	<0.0001
-3.89	-36.48		Slope	1.038 to 1.773		P value summary	****
			Y-intercept	-31.22 to -14.03		Significant? (alpha = 0.05)	Yes
			X-intercept	8.207 to 29
						Number of XY Pairs	8
			Goodness of Fit
			R square	0.9359
			Sy.x	6.313
			Is slope significantly non-zero?
			F	87.54
			DFn, DFd	1, 6
			P value	<0.0001
			Deviation from zero?	Significant
			Equation	Y = 1.406*X - 22.63
			Data
			Number of X values	8
			Maximum number of Y replicates	1
			Total number of values	8
			Number of missing values	0
Delta PNA amplitude (%)	Delta Traube-Hering waves amplitude (%)		Linear regression analysis			Correlation analysis
4.22	-35.49		Best-fit values ± SE			Pearson r
-5.32	-39.64		Slope	1.254 ± 0.2507		r	0.8981
-35.3	-72.96		Y-intercept	-35.87 ± 5.86		95% confidence interval	0.5268 to 0.9816
-17.16	-37.82		X-intercept	28.61		R squared	0.8066
-36.42	-87.89		1/slope	0.7976
-34.41	-89.22					P value
-16.15	-56.92		95% Confidence Intervals			P (two-tailed)	0.0024
-3.89	-48.07		Slope	0.6404 to 1.867		P value summary	**
			Y-intercept	-50.21 to -21.53		Significant? (alpha = 0.05)	Yes
			X-intercept	12.14 to 74.44
						Number of XY Pairs	8
			Goodness of Fit
			R square	0.8066
			Sy.x	10.53
			Is slope significantly non-zero?
			F	25.02
			DFn, DFd	1, 6
			P value	0.0024
			Deviation from zero?	Significant
			Equation	Y = 1.254*X - 35.87
			Data
			Number of X values	8
			Maximum number of Y replicates	1
			Total number of values	8
			Number of missing values	0
Delta PNA amplitude (%)	Delta RSA amplitude (%)		Linear regression analysis			Correlation analysis
4.22	-86.37		Best-fit values ± SE			Pearson r
-5.32	-11.26		Slope	0.09553 ± 0.8128		r	0.04793
-35.3	-81.03		Y-intercept	-57.12 ± 19		95% confidence interval	-0.6797 to 0.728
-17.16	-15.88		X-intercept	597.9		R squared	0.002297
-36.42	-75.63		1/slope	10.47
-34.41	-40.23					P value
-16.15	-87.82		95% Confidence Intervals			P (two-tailed)	0.9103
-3.89	-72.53		Slope	-1.893 to 2.084		P value summary	ns
			Y-intercept	-103.6 to -10.62		Significant? (alpha = 0.05)	No
			X-intercept	6.176 to +infinity
						Number of XY Pairs	8
			Goodness of Fit
			R square	0.002297
			Sy.x	34.15
			Is slope significantly non-zero?
			F	0.01381
			DFn, DFd	1, 6
			P value	0.9103
			Deviation from zero?	Not Significant
			Equation	Y = 0.09553*X - 57.12
			Data
			Number of X values	8
			Maximum number of Y replicates	1
			Total number of values	8
			Number of missing values	0

## Sheet: Fig 8M
Time to max decrease SNA	Time to max increase SNA	Time to max decrease VNA		Time to maximum amplitude
0.1017	0.1625	0.0233		One Way Repeated Measures Analysis of Variance
0.1071	0.3343	0.0188
0.1301	0.3951	0.0178
0.1017		0.0119
0.1038	0.1368			Normality Test (Shapiro-Wilk)	Passed	(P = 0.856)
0.084	0.1716
0.1563	0.3841			Equal Variance Test:	Passed	(P = 0.057)
0.1127	0.2695	0.0116
				Treatment Name	N	Missing	Mean	Std Dev	SEM
				Time max decrease SNA	8	0	0.112	0.022	0.00777
				Time max increase SNA	8	1	0.265	0.109	0.0413
				Time max decrease VNA	8	3	0.0167	0.00496	0.00222
				Source of Variation	DF	SS	MS	F	P
				Between Subjects	7	0.0431	0.00616
				Between Treatments	2	0.174	0.087	27.177	<0.001
				Residual	10	0.032	0.0032
				Total	19	0.266	0.014
				The differences in the mean values among the treatment groups are greater than would be expected by chance; there is a statistically significant difference (P = <0.001). To isolate the group or groups that differ from the others use a multiple comparison procedure.
				Power of performed test with alpha = 0.050: 1.000
				Expected Mean Squares:
				Approximate DF Residual = 10.000
				Expected MS(Subj) = var(res) + 2.429 var(Subj)
				Expected MS(Treatment) = var(res) + var(Treatment)
				Expected MS(Residual) = var(res)
				All Pairwise Multiple Comparison Procedures (Holm-Sidak method):
				Overall significance level = 0.05
				Comparisons for factor:
				Comparison	Diff of Means	t	P	P<0.050
				Time max inc vs. Time max dec	0.257	7.255	<0.001	Yes
				Time max inc vs. Time max dec	0.152	5.11	<0.001	Yes
				Time max dec vs. Time max dec	0.105	3.068	0.012	Yes
Delta decrease SNA	Delta increase SNA	Delta decrease VNA		Delta SNA and VNA
-0.1448	0.4025	-0.2207		One Way Repeated Measures Analysis of Variance
-1.0217	0.4269	-0.14
-1.7174	1.5666	-0.3277
-1.1887	1.4313	-0.1633
-1.687	2.9522	-0.1239		Normality Test (Shapiro-Wilk)	Passed	(P = 0.794)
-0.8846	1.1766
-2.183	1.2093			Equal Variance Test:	Passed	(P = 0.197)
-0.7409	0.9299
				Treatment Name	N	Missing	Mean	Std Dev	SEM
				Delta dec SNA	8	0	-1.196	0.647	0.229
				Delta inc SNA	8	0	1.262	0.805	0.285
				Delta dec VNA	5	0	-0.195	0.0827	0.037
				Source of Variation	DF	SS	MS	F	P
				Between Subjects	7	1.314	0.188
				Between Treatments	2	24.459	12.23	21.787	<0.001
				Residual	11	6.175	0.561
				Total	20	31.852	1.593
				The differences in the mean values among the treatment groups are greater than would be expected by chance; there is a statistically significant difference (P = <0.001). To isolate the group or groups that differ from the others use a multiple comparison procedure.
				Power of performed test with alpha = 0.050: 1.000
				Expected Mean Squares:
				Approximate DF Residual = 11.000
				Expected MS(Subj) = var(res) + 2.571 var(Subj)
				Expected MS(Treatment) = var(res) + var(Treatment)
				Expected MS(Residual) = var(res)
				All Pairwise Multiple Comparison Procedures (Holm-Sidak method):
				Overall significance level = 0.05
				Comparisons for factor:
				Comparison	Diff of Means	t	P	P<0.050
				Delta inc SN vs. Delta dec SN	2.458	6.561	<0.001	Yes
				Delta inc SN vs. Delta dec VN	1.526	3.383	0.012	Yes
				Delta dec VN vs. Delta dec SN	0.932	2.066	0.063	No
Absolute AUC SNA trough	Absolute AUC SNA peak	Absolute AUC VNA trough		Absolute AUC
0.0049183	0.1186	0.0085253		One Way Repeated Measures Analysis of Variance
0.0403	0.1125	0.0010278
0.2418	0.2608	0.0039799
0.0484	0.3607	0.0024405
0.0642	0.0363	0.0017012		Normality Test (Shapiro-Wilk)	Passed	(P = 0.787)
0.0415	0.0641
0.22	0.1045			Equal Variance Test:	Passed	(P = 0.902)
0.0295	0.1098
				Treatment Name	N	Missing	Mean	Std Dev	SEM
				SNA trough absolute AUC	8	0	0.0863	0.091	0.0322
				SNA peak absolute AUC	8	0	0.146	0.109	0.0385
				VNA trough absolute AUC	5	0	0.00353	0.003	0.00134
				Source of Variation	DF	SS	MS	F	P
				Between Subjects	7	0.0636	0.00909
				Between Treatments	2	0.0666	0.0333	4.739	0.033
				Residual	11	0.0773	0.00702
				Total	20	0.203	0.0102
				The differences in the mean values among the treatment groups are greater than would be expected by chance; there is a statistically significant difference (P = 0.033). To isolate the group or groups that differ from the others use a multiple comparison procedure.
				Power of performed test with alpha = 0.050: 0.554
				Expected Mean Squares:
				Approximate DF Residual = 11.000
				Expected MS(Subj) = var(res) + 2.571 var(Subj)
				Expected MS(Treatment) = var(res) + var(Treatment)
				Expected MS(Residual) = var(res)
				All Pairwise Multiple Comparison Procedures (Holm-Sidak method):
				Overall significance level = 0.05
				Comparisons for factor:
				Comparison	Diff of Means	t	P	P<0.050
				SNA peak abs vs. VNA trough a	0.155	3.074	0.031	Yes
				SNA trough a vs. VNA trough a	0.0955	1.893	0.163	No
				SNA peak abs vs. SNA trough a	0.0596	1.423	0.183	No
